# Supplementary material for: Isolation and Characterization of the Genes Involved in the Berberine Synthesis Pathway in Asian Blue Cohosh, Caulophyllum robustum
Source: MDPI journal article supplement (doi:10.3390/plants12071483), 2023-03-28
Supplement: s1 [file s1]

## 6OMT Group1

|           |                                                         |                      |                                                            |
|-----------|---------------------------------------------------------|----------------------|------------------------------------------------------------|
|           | I                                                       | II                   |                                                            |
| Bkor60MT3 | SALINECKDKFQGI NSLVDVGGGTGTAA RNLVKAFPHLKC              | CTVYDLPHV            | IADSPVYPE IQ 232                                           |
| Cro60MT4  | SALVNECKGVFGVKVKT                                       | LDVVG                | GGGTGTAVMNI AKAFPSIQCSVYDLAHV IADSNAPFE INR 233            |
| Cro60MT3  | SAFLNCKDKF                                              | IGITSLVDVAGGTGTAVMNI | AKAFPHIKCTLYDLPHV IADSPAYPE IDR 229                        |
| Cro60MT5  | SALVNECKDKF                                             | IGITSLVDVGGGTGTAVMNI | AKAFPHIKCTVFDLPHV IADSVAYPE INR 230                        |
| Cro60MT6  | SALVNECKDKF                                             | IGITSLVDVGGGTGTAVMNI | AKAFPHIKCTVFDLPHV IADSVAYPE INR 89                         |
|           | ***::* * * *::****,*****. *::**** ::*::** ***** ::** :  |                      |                                                            |
|           | III                                                     | IV                   |                                                            |
| Bkor60MT3 | VPGDMF                                                  | KV                   | IPYADAILMKCILHWDGDECI ELKKCKEALPKEGGKV IVDIVLDVKSEH 292    |
| Cro60MT4  | VAGDMF                                                  | FEH                  | IPNADAILMKCILHWDSEECIQILKKCKKAVPKNGGKV IVDIVLDVESQH 293    |
| Cro60MT3  | VAGDMF                                                  | KY                   | IPSADAILMKYILHDYDEKCIQILKKCKKAVSEDEGGKV I IDIVLNVD SKH 289 |
| Cro60MT5  | VAGDMF                                                  | NY                   | IPSADAILMKSILHGFDDAECTQILKKCKKAVPKDEGGKV IVDIVLNGESEH 290  |
| Cro60MT6  | VAGDMF                                                  | NY                   | IPSADAILKYILHDFDDEECTQILKKCKKAVPKDEGGK I IDIVLNVESEH 149   |
|           | * ****::** ***** * ***,*,* *::*****:*::****::*****::*,* |                      |                                                            |
|           | V                                                       |                      |                                                            |
| Bkor60MT3 | PYTKLRLTLDVDMMLNT                                       | GGGKERT              | EEEWKKL IQDAGFSYNITQISALQSVIEAFPY 349                      |
| Cro60MT4  | PYTKMRLTLDLDMMLNT                                       | GGGKERT              | EEEWKKL IYAAGFSYNITQISAAQSVIEAFPY 350                      |
| Cro60MT3  | PLTKFRVSSDLDMMLTT                                       | GGGKERT              | KEEWKKLFKAAGYKGYNITEISALQSVIEAFPY 346                      |
| Cro60MT5  | PYTKMRVTMDMDMM                                          | IAT                  | EGGKERT EEEWKLLF DAVGRSYKISQISALQSVIEAFPY 347              |
| Cro60MT6  | PYTNMRVTMD                                              | IDMM                 | IGTGGGKERT EEEWKLLF GAAGFRSYNISQISALQSVIEAFPY 206          |
|           | * *::**::* *****: * *****:*****: *::*::** *****:*****:  |                      |                                                            |

## 6OMT Group II

|           | I                                                                                      | II  |
|-----------|----------------------------------------------------------------------------------------|-----|
| Bkor60MT1 | SHTSMVTDVAVVGKEFDHVLDMGTS <b>L I DVGGS</b> GTGVAARA I AKAFPE-VKC <b>AVFDLPHV I</b> A   | 218 |
| Bkor60MT6 | SHTSMVTDVAVVGKEFDHVLDMGTS <b>L I DVGGS</b> GTGVAARA I AKAFPE-VKC <b>AVFDLPHV I</b> A   | 218 |
| Bkor60MT2 | SHTMFV I PAVVGGLMKSKI LDDVKS <b>LVDVGGS</b> GTGAAAKG I ADGFPH-VKC <b>FVMDLAHV I</b> E  | 224 |
| Bkor60MT7 | SHTMFV I PAVVGGLMKSKI LDDVKS <b>LVDVGGS</b> GTGAAAKG I ADGFPH-VKC <b>FVMDLAHV I</b> E  | 224 |
| Cro60MT2  | SHTKCMVPALVTGLVKEKVLDDVTS <b>LVDVGGS</b> SEGI AAKAIKE I ASH-VKC <b>VMDLAHV I</b> E     | 230 |
| Cro60MT1  | SHTKCMVSAVLVGLTKERVLDDVT I <b>LVDVGGS</b> SEGVASKA I VDAASH-VKC I <b>VMDLSHV I</b> E   | 229 |
| Bkor60MT4 | SHTMCMVPALVSGLTKENVLADVAS <b>LMDVGGS</b> SEGI ASKAV I QVVSII VKC I I <b>MDLAHV I</b> D | 146 |
| Bkor60MT5 | SHTMCMVPALVSGLTKENVLADVAS <b>LMDVGGS</b> SEDI I SWL-----                               | 125 |
|           | *** : *:* *: *. : * : : * :***** . :                                                   |     |
|           | III                                                                                    | IV  |
| Bkor60MT1 | TAPECEPV <b>TRI EGDVF</b> VSLPKTDLVFMKSVLHDWGDEDCVK I LNKCKEA I ADS <b>KQKG I</b> VL   | 278 |
| Bkor60MT6 | TAPECEPV <b>TRI EGDVF</b> VSLPKTDLVFMKSVLHDWGDEDCVK I LNKCKEA I ADS <b>KQKG I</b> VL   | 278 |
| Bkor60MT2 | SVPKDGGL <b>NFVAGDMF</b> SF I PKADA I FLKSVLHNYDDVCLK I LAKCKEA I PL- <b>TKGKV I</b> L | 283 |
| Bkor60MT7 | SVPKDGGL <b>NFVAGDMF</b> SF I PKADA I FLKSVLHNYDDVCLK I LAKCKEA I PL- <b>TKGKV I</b> L | 283 |
| Cro60MT2  | TVPKDARL <b>EYVLAGDMF</b> AS I PQTDAVLLKSVLHNYDGRGLE I LGCKVA I PA- <b>TKGKV I</b> L   | 289 |
| Cro60MT1  | SVPKDPRL <b>DFLAGDMF</b> AFV PQTDAVLLKS I LHNYDDHCVK I LTMCKEA I HS- <b>TRGKV I</b> I  | 288 |
| Bkor60MT4 | TVPNDRPL <b>DFLAGDMF</b> DFVPKADAVLLKS I LHNYDDENCLK I LTKCKEA I PT- <b>KGKGV I</b>    | 205 |
| Bkor60MT5 | ----- <b>VTFD</b> VPKADAVLLKS I LHNYDDENCLK I LTKCKEA I PT- <b>KGKGV I</b>             | 171 |
|           | * :*: :* :*: :*: :*: :* : :*: ** ** . * :*: :                                          |     |
|           | V                                                                                      |     |
| Bkor60MT1 | VE I VMDAVSTDEEFSAKLGMEMDMLVT <b>VAGKER</b> SEQEWQSLFKAAGYSRYH I TPIVA I E             | 338 |
| Bkor60MT6 | VE I VMDAVSTDEEFSAKLGMEMDMLVT <b>VAGKER</b> SEQEWQSLFKAAGYSRYH I TPIVA I E             | 338 |
| Bkor60MT2 | VE I VVDVE-TLPEFSARCCMDMEMML- <b>MGGKERT</b> KQEWVLLDKAGFSHHE I I PVMA--               | 339 |
| Bkor60MT7 | VE I VVDVE-TLPEFSARCCMDMEMML- <b>MGGKERT</b> KQEWVLLDKAGFSHHE I I PVMA--               | 339 |
| Cro60MT2  | VE I VLETE-NLAEFAPGRLGVDQM I C- <b>MGGKERT</b> KQEWECLLHKAGFTLHNI I PIMANE             | 347 |
| Cro60MT1  | VE I I DTE-NLQEFSSARLGLDMEMLC- <b>MGGKERT</b> KQEWKCLDKVGFSHHDI I PIRAI E              | 346 |
| Bkor60MT4 | VE I VIDTQ-NLPEFSARLGLDMEM I C- <b>MGGQERT</b> KQEWATLLHKAGFDHHT I I PIRAI E           | 263 |
| Bkor60MT5 | VE I VIDTQ-NLPEFSARLGLDMEM I C- <b>MGGQERT</b> KQEWATLLHKAGFDHHT I I PIRAI E           | 229 |
|           | ***: : ** : : * : : * : : * : : * : : * : : * : : * : : *                              |     |

Supplementary Figure S1. Sequence comparison of the group 1 and group II of 6OMTs of *C. robustum* and *B. koreana*. The conserved motif sequences are highlighted with red. The motifs I and IV are S-adenosyl-L-methionine binding (conserved region I) and metal binding (conserved region IV) sites, respectively.
