# Supplementary material for: Isolation and Characterization of the Genes Involved in the Berberine Synthesis Pathway in Asian Blue Cohosh, Caulophyllum robustum
Source: MDPI journal article supplement (doi:10.3390/plants12071483), 2023-03-28
Supplement: s1 [file s1]

**Supplementary Table S1.** Number of reads and read length before and after processed

| Sample                | Raw data        |                | Cleaned data           |                           |
|-----------------------|-----------------|----------------|------------------------|---------------------------|
|                       | Number of reads | Length (bp)    | Number of reads        | Length (bp)               |
| Caulophyllum1 (fruit) | 58,937,132      | 8,899,506,932  | 53,745,338<br>(91.19)* | 7,408,922,298<br>(83.25)  |
| Caulophyllum2 (leaf)  | 70,856,856      | 10,699,385,256 | 64,276,390<br>(90.97)  | 8,866,906,225<br>(82.87)  |
| Caulophyllum3 (stem)  | 67,616,396      | 10,210,075,796 | 61,966,482<br>(91.64)  | 8,460,162,998<br>(82.86)  |
| Total                 | 197,410,384     | 29,808,967,984 | 179,988,210<br>(91.17) | 24,735,991,521<br>(82.98) |

Note: The numbers in brackets are percent after cleaned from the raw data.

**Supplementary Table S2.** Mapping Information of the clean reads.

|                             | Fruit      | Leaf       | Stem       |
|-----------------------------|------------|------------|------------|
| Number of total reads       | 53,745,338 | 64,276,390 | 61,966,482 |
| Number of Mapped PE Reads   | 37,095,516 | 46,280,136 | 43,994,548 |
| % of mapped PE Reads number | 72         | 69         | 71         |

**Supplementary Table S3.** De novo assembly results.

|                            | No. of contigs | Length of contigs | Minimum length | Maximum length | Average length |
|----------------------------|----------------|-------------------|----------------|----------------|----------------|
| Trinity                    | 252,149        | 197,484,773       | 180            | 16,539         | 783            |
| CD-HIT-EST                 | 225,623        | 167,006,458       | 189            | 16,539         | 740            |
| Mapping Filter (10> reads) | 175,172        | 153,608,750       | 189            | 16,539         | 877            |
| TransDecoder.LongOrfs      | 96,030         | 67,303,215        | 297            | 14,427         | 701            |
| TransDecoder.Predict       | 58,659         | 91,486,519        | 297            | 16,539         | 1,338          |
| Redundance remove          | 41,094         | 54,964,984        | 297            | 16,539         | 1,338          |
| Final                      | 41,094         | 54,964,984        | 297            | 16,539         | 1,338          |

**Supplementary Table S4.** Number of expressed genes in different tissues.

|    | Leaf   | Fruit  | Stem   |
|----|--------|--------|--------|
| 0  | 3,986  | 5,497  | 4,486  |
| >0 | 37,108 | 35,597 | 36,608 |
