# Supplementary material for: Isolation and Characterization of the Genes Involved in the Berberine Synthesis Pathway in Asian Blue Cohosh, Caulophyllum robustum
Source: Plants (Basel). 2023 Mar 28;12(7):1483. doi: 10.3390/plants12071483 (PMC10096549; doi:10.3390/plants12071483)
Supplement: Supplementary file 1 [file plants-12-01483-s001.zip › Supplementary Table S5.xlsx]

## Sheet: Sheet1
Supplementary Table 5. Protein sequences of the berberine synthesis genes in berberine producing plants.
Species	Gene	Gene Abbreviation	Gene ID	Protein sequences
Caulophyllum robustum	Tyrosine/dopa decaroxylase	TYDC	>CroG06134T	MGSLHAEDLENISACVQNPLDPEEFRRQGHLVIDFLADYYRDIEKYPVRSQVEPGYLGKLVPESAPYNPEPIETILQDVQSQIVPGITHWQSPNYFAYFPSSGSVAGFLGEMLSTGFNVVGFNWMSSPAATELESIVMDWLGKMLKLPKSFLFSGNGGGVLQGTTCEAILCTVTAARDRMLNKIGRENIGKLVVYGSDQTHCALQKAAQIAGIHPKNFRAVATTKSDAFGLSAKALRAAVLADKEAGLIPLFLCATIGTTSSTAVDPIGPLCEVAKEHFIWVHIDAAYAGSACICPEFRHYIDGVEHADSFSLNAHKWFFTTLDCCCLWVKDPSSLVKALSTNPEYLRNKATESKQVVDYKDWQIALSRRFRSMKLWLVLRSYGVSNLRNFLRSHVKMA…
Caulophyllum robustum	Tyrosine/dopa decaroxylase	TYDC	>CroG50615T	MENNKWGSKNCNGGGEEQKWCFKGNEKVSKASGITIRGILGILMEARDEKDERMTIPLGHGDPSAFPCFRASLMAEDAIVSSLRSAKFNSYSPSVGVLPARRAIAEYLSNDLPYQLSADDVFLTVGCIQAIEVVLSVLARPGANILLPRVGFPIYESRATFSNIEVRHFDLFPENGWEIDLENILALADENTVGMVVINPGNPCGSVFTYQHMKKIAETAKRLGILIIADEVYGHLTFGSKPFIPMGVFSSIAPVITLGSLSKKWLVPGWRLGWIATNDPNGILKETKIVESIVGYLNISTDPATFIQAAVPKILEGTTVDFFDKIISILRESAGICYDEISEIHCISCPHKPEGSMFVMVKLDTSLLEDIEDDIEFCIKLAKEESVIVLPGIAVGLKN…
Caulophyllum robustum	Tyrosine/dopa decaroxylase	TYDC	>CroG55638T	MENGGPKKWNFKANDKINTAGDITVRGCLNKLMSCLDPSDERPVIPLGHGDPSAFPCFRTTPIAEDAIVEAVRSAKFNHYSPTNGILPARRAISEYLSRDLPYKLSPDDVFLTLGCTQAIEVSLTTLARAGANILLPRPGYPYYEALCSFHNLEARHYDLLPEKGWEVDLNAVEALADENTVAMVIINPGNPCGNVFTYDHLKKVAETAKKLGLLMITDEVYGHLTFGSNPFVPMGVFGSIVPVLTLGSISKRWIVPGWRLGWLVTNDPNGVLKETKLVESLVGFLNLCNDPATFIQGAVPHILEKTKDDFFNKITSLLGQCADVCYDGIKEINCMTCPNKPESSMFVMVKLNMSLMEDIIDDTDFCVKLAKEESVIVLPGITIGVKDWLRITFAVEPS…
Caulophyllum robustum	Hydroxyphenyl decarboxylase	HPPDC	>CroG06134T	MGSLHAEDLENISACVQNPLDPEEFRRQGHLVIDFLADYYRDIEKYPVRSQVEPGYLGKLVPESAPYNPEPIETILQDVQSQIVPGITHWQSPNYFAYFPSSGSVAGFLGEMLSTGFNVVGFNWMSSPAATELESIVMDWLGKMLKLPKSFLFSGNGGGVLQGTTCEAILCTVTAARDRMLNKIGRENIGKLVVYGSDQTHCALQKAAQIAGIHPKNFRAVATTKSDAFGLSAKALRAAVLADKEAGLIPLFLCATIGTTSSTAVDPIGPLCEVAKEHFIWVHIDAAYAGSACICPEFRHYIDGVEHADSFSLNAHKWFFTTLDCCCLWVKDPSSLVKALSTNPEYLRNKATESKQVVDYKDWQIALSRRFRSMKLWLVLRSYGVSNLRNFLRSHVKMA…
Caulophyllum robustum	Dopa Decarboxylase	3OHase	>CroG56942T	MGSLDSIFPESQDEFKPLELEQFRKQAYQTIDFIVDYYKNIESYPVLSQVQPGYLQTRLPDTAPYKPESFDTILNSVQTDIMPGMTHWLSPNFFAYFPATVSTAGFLGEMLCTAFNSVGFNWLASPASTELETVVMDWIGKMLKLPSSFLFSGSGGGVIQGTTSEAILCTLIAARDRTLERIGDVNISKLVVYGSDQTHSTFAKACKIAGILPRNVRSLPTVMEDGFSLSPTLVRNAIECDVQAGLVPIYLCATVGTTSSTAVDPIGPLADVAKSYDIWVHVDAAYAGSACICPEFRHYLDGIERVDSFSMSPHKWFLTYLDCCCLWVKQPSLIHKALSTNPEYLKNKPSESNSVVDYKDWQIGFGRRFRAIRLWFVLRSYGVANLQSHIRSDVRMARM…
Caulophyllum robustum	S-norcoclaurine synthase 1-like	NCS	>CroG58185T	MNAVSVANVQDLATKIQNVIPSRYIRPELAAEVVSTNEESMNIPVIDLKKLTDEKLCGDEMENFHAACKDWGFFQLINHGLQEDVLDKFKFDVTEFFKQPIEEKKAFSQEPGEIEGYGQAFVFSDEQKLDWGDMLYLTTQPEASRRTEFWPTCPHSLRDSIAKYSEELQKIKYCVLGSMAKNLGLKVKNFTNMFEEGMQSIRFNYYPPCPEDDKVLGISPHSDATGITFLIQVNHVDGLQIRHKGRWVPVVLSTDAILVNIGDILEILSNGKYKSIEHRVVINKNKERLSVAAFHDMNKNETVGPLSELIKDDGAKHFKTMTYNEYVEFSLGRTINGKSQIEIMRLEK
Caulophyllum robustum	S-norcoclaurine synthase 1-like	NCS	>CroG58186T	MNMLILYPKEIRKHCHGCLSTLPKCDHTFLGLFQFSTLQLGSYMGLLDEQFGLDELAKLHFACEDWGFFQLINHGVSVEIIKKMKIDVEEFFRLPLEVKKAYSQLPNNIEGYGQAFVVSEEQKLDWADLLFLISLPISRRNLNFWPNTPTSFRETLEKYSLELRRVAICLIGLMAKNLGVEPEKMTNMFENNGSQTFRMNYYPPCPHAHKVLGLSPHSDSNGLTLLFQVNEVEGLQIRKNGNWVPVKPITGAFIVNVGDVIEIMSNGKYKSIEHRAVINQEKARLSIAAFHGPNLSAMIGPLPDLLKENEEHCYKTVSYEDFIMQVLSTKLNGKSVLDSIKIHK
Caulophyllum robustum	S-norcoclaurine synthase 1-like	NCS	>CroG58187T	MGSKMHNARELGGSLPVENVQALAAKELEETPDWYIRPELESDVVSLDKSKEIPVIDLCRLLDEQFGLDELAKLHFACEDWGFFQLINHGVSVEIIKKMKIDVEEFFRLPLEVKKAYSQLPNNIEGYGQAFVVSEEQKLDWADLLFLISLPISRRNLNFWPNTPTSFRETLEKYSLELRRVAICLIGLMAKNLGVEPEKMTNMFENNGSQTFRMNYYPPCPHAHKVLGLSPHSDSNGLTLLFQVNEVEGLQIRKNGNWVPVKPITGAFIVNVGDVIEIMSNGKYKSIEHRAVINQEKARLSIAAFHGPNLSAMIGPLPDLLKENEEHCYKTVSYEDFIMQVLSTKLNGKSVLDSIKIHK
Caulophyllum robustum	S-norcoclaurine synthase 1-like	NCS	>CroG58196T	MESEKYTPREFGGSLPVPNVQALAAKKITEIPNRYIRPELESVIVSVDESREVPVIDLCKLLGEHSGRDELAKLHSACEEWGFFQLINHGVPEEIIKKIEMDVQEFFNLPLEEKKVYSQAPNNIEGYGQAFVVSEDQKLDWSDMLYLVALPIIERNMKFWPQNPSSFRETLDKYSSELQKFTLCLTGLIAKNLGVEPEKLTNMFVNGSQGIRMNYYPPCPNTEKVIGISPHSDASGLTLLTQVNKVEGLQVRKNGSWVPIKPIAGAFIINIGDSLEIISNGKYKSIEHRAIIHPEKERM
Caulophyllum robustum	S-norcoclaurine synthase 1-like	NCS	>CroG23293T	LQEFFNLPLEEKLVYSQPPNSTEGYGQAFVVSDEQKLDWSDMFYLMSLPVHERNMKLWPNKPTSFRETLDKYSSELERVTICLTDLMAKNLGVEPKKLSNMFMNGSQDMRMNYYPPCPHADKVIGICPHSDSVGLTLLLQVNEVEGLQIRKNEKWVPVKPIPGAFIVNIGDLLEIISNGKYKSIEHMAIIHPKKERISIAAFHGPNPSATIGP
Caulophyllum robustum	S-norcoclaurine synthase 1-like	NCS	>CroG39351T	KLTILEVFTSQICKHCIFSGFVCFADPFLFLFPLVFSLSSNYVCSYLNKSTKGILDLFKILVHKCFRRRMESEMNGPREFGGSLPVSNVQALAAKEIKVILDRRMEREMNGPRELGGSLPVSNVQALAAKEIKVILDRRMEREMNGPRELGGSLPVSNVQALAAKEIKVILDRYIRPELESVVVSIDESREIPVIDLSKLLDERFLLSVTKRHGSF
Caulophyllum robustum	S-norcoclaurine synthase 1-like	NCS	>CroG58184T	MEPVLPLPIYFQNVQDLATKNLDVIPSRYIRPELTTDIVSVEEGSMVPIIDLSKLIDGQFSQDELAKFHVACKDWGFFQLINHGLQEDVLDKFKFDVTEFFKQPIEEKKAFSQEPGEIEGYGQAFVFSDEQKLDWGDMLYLITQPEASRRMKFWPTCPHSLRDSIAKYSEELQKKKNCLLGLMAKNLGLKVENFTNMFEEGMQSIRFNYYPPCPEDDKVLGISPHSDATGITFLIQVNHVDGLQIRHKGHWVPVVLSTDAILVNIGDVLEILSNGKYKSIEHRVVINKNKERLSVAAFHELNTNVAVGPLPELVKDDGAKHFKTLTFDDYSKLLLGKTLNGKSLIETMKLEK
Caulophyllum robustum	S-norcoclaurine synthase 1-like	NCS	>CroG10301T	MRGFVSNDMDVPLPADDIWAVYSSPDLPRLIVELQPGVFEKLDVVKGDGRVGTVLHIVLAPGSSGLRSWEENFIKIDDETRTKVIRMIKGGYLDIGFHLYEVTFKIIEKDDCSCIINSSVSYEVDDKFALNASLITGDSFWGMAKAIANYAIQNNDKKCRKFESKAPMLHDYAHTK
Caulophyllum robustum	S-norcoclaurine synthase 1-like	NCS	>CroG23291T	LQEFFNLPLEEKLVYSQPPNSTEGYGQAFVVSDEQKLDWSDMLFLMSLPVDERNMKLWPNNPTSFRETLDKYSSELERVTISLTGFMAKSLGLKPEKLSNMFMNGSQGMRMNYYPPCPHADKVIGICPHSDSVGLTLLLQVNEVEGLQIKKNGNWVPIKPIPGAFIVNIGDVLEIISNGKYKSIEHRAIIHPEKERMSIAAFHGPNPSATIGP
Caulophyllum robustum	(RS)-norcoclaurine 6-O-methyltransferase	NCS	>CroG43049T	MKMQKEQDVSGQAKIWNYIYGFSDSMLLRCAVDLDIANIIHNHEKPITLSELASKLPVQPVKLESLYRVMRHLVHMKLFTKTKVDGEIVYGLAPPAKFLVKGEKSMVNLVLGFSDKDLMSPWHYIKDAVAGETAFEKALGMEVWTYLGKHEEKSQLVNEIMASDTKLVMSAFLNKCKDKFIGITSLVDVAGGTGTAVWNIAKAFPHIKCTLYDLPHVIADSPAYPEIDRVAGDMFKYIPSADAILMKYILHDYDDEKCIQILKKCKKAVSEDGGKVIIIDIVLNVDSKHPLTKFRVSSDLDMMLTTGGGKERTKEEWKKLFKAAGYKGYNITEISAIQSVIEAFPY
Caulophyllum robustum	Tyrosine aminotransferase	TyrAT	>CroG50615T	MENNKWGSKNCNGGGEEQKWCFKGNEKVSKASGITIRGILGILMEARDEKDERMTIPLGHGDPSAFPCFRASLMAEDAIVSSLRSAKFNSYSPSVGVLPARRAIAEYLSNDLPYQLSADDVFLTVGCIQAIEVVLSVLARPGANILLPRVGFPIYESRATFSNIEVRHFDLFPENGWEIDLENILALADENTVGMVVINPGNPCGSVFTYQHMKKIAETAKRLGILIIADEVYGHLTFGSKPFIPMGVFSSIAPVITLGSLSKKWLVPGWRLGWIATNDPNGILKETKIVESIVGYLNISTDPATFIQAAVPKILEGTTVDFFDKIISILRESAGICYDEISEIHCISCPHKPEGSMFVMVKLDTSLLEDIEDDIEFCIKLAKEESVIVLPGIAVGLKN…
Caulophyllum robustum	Tyrosine aminotransferase	TyrAT	>CroG55638T	MENGGPKKWNFKANDKINTAGDITVRGCLNKLMSCLDPSDERPVIPLGHGDPSAFPCFRTTPIAEDAIVEAVRSAKFNHYSPTNGILPARRAISEYLSRDLPYKLSPDDVFLTLGCTQAIEVSLTTLARAGANILLPRPGYPYYEALCSFHNLEARHYDLLPEKGWEVDLNAVEALADENTVAMVIINPGNPCGNVFTYDHLKKVAETAKKLGLLMITDEVYGHLTFGSNPFVPMGVFGSIVPVLTLGSISKRWIVPGWRLGWLVTNDPNGVLKETKLVESLVGFLNLCNDPATFIQGAVPHILEKTKDDFFNKITSLLGQCADVCYDGIKEINCMTCPNKPESSMFVMVKLNMSLMEDIIDDTDFCVKLAKEESVIVLPGITIGVKDWLRITFAVEPS…
Caulophyllum robustum	(RS)-norcoclaurine 6-O-methyltransferase-like isoform 1	6OMT	>CroG53174T	MSSKPSNLKTFLDCATPIIPSEILPKDGFPNLNRLWNPLDTEMIEFFTLRDMWNCLVEWSYYGEGVPIVLNEKQSVDNYYVPYLSGIQLFTNQASLTSFGDPIVADIEMKDWSSDSWSDENMSDNSWPGSSAVSGFEPERPWTHNEKFGYLYFQFFERISPYKRIPLFDKVNDMAQRFHGLMSLRTIDLSPASWMAISWYPLYHIPQGKNWQDLNTCFLTYHALSSSFYGIEEGMRIKDASINVTRIHEKETKKGAVPLTPFGLATYKFTGDVWLADGDAGKQPNLLKLYSAADSWLEQLGVHHPDFNYFTENQNG
Caulophyllum robustum	(RS)-norcoclaurine 6-O-methyltransferase-like isoform 1	6OMT	>CroG53176T	MSSKPSNLKMFLDCTTPVIPSRMLPKDGFPNLNRLWHPLDTEMIEFFTLRDMWNCLVEWSYYGEGVPIVLNEKQSVYNYYVPYLSGIQLFTNQIALSSFRDPIVADMDMKDWSSDSWSDENMSDNSWPGSPVDSGFELESPWTHNEKFGYLYFQFFERISPYKRTPLFDKVNGLAQIFHGLMSLRTVDLSPASWMAVSWYPLYHIPQGKNWQDLETCFLTYHTLSSFHGIEEGTGINYASINETRMHEKEMVKGVVPLTPFGLATYKFNGQVWLADEDAGTGLKLLKLYNAADSWLKLLGVQHHDFNYFTRNRNE
Caulophyllum robustum	(RS)-norcoclaurine 6-O-methyltransferase-like isoform 1	6OMT	>CroG14756T	METFKNNPNQFHKDDEGEEIRAQAQVWKHMYGFADTIMLRCALRLELPDIIHKHGPMILSQIASKLPFDSINHDRFNHIMRYLVHMKLFTVDMEKTPEERKYALTRASELLVKSHEKSLAPFAMLQTHPQEFTLWGHFIENLDGAKRYTEVYNDMDNDQEINKLVNEAMTSHTKCMVSALVVGLTKERVLDDVTILVDVGGSEGVASKAIVDAASHVKCIVMDLSHVIESVPKDPRLDFLAGDMFAFVPQTDAVLLKSILHNYDDDHCVKILTMCKEAIHSTRGKVIIVEIIIDTENLQEFSSARLGLDMEMLCMGGKERTKQEWKCLLDKVGFSHHDTIPIRAIESIIVAYP
Caulophyllum robustum	(RS)-norcoclaurine 6-O-methyltransferase-like isoform 1	6OMT	>CroG14757T	MGSYEKDQCLLEQNGEQDEEIIARAQVWNHMYAFANTIMLRCALRLELPDLVHKHGPMTLSELASKLPFKAIDLDRLNHIMRYLVHMKLFSVDMEKTPEQRTYALTRVSEFLVKSHEKSLAPLAMMQTHPQVFPIMEHFIENLDVVTTYTERYHDMDQDPEINNLLNEAMTSHTKCMVPALVTGLVKEKVLDDVTSLVDVGGSEGIAAKAIKEIASHVKCVVMDLAHVIETVPKDARLEYLAGDMFASIPQTDAVLLKSVLHNYGDDRGLEILGKCKVAIPATKGKVILVEIVLETENLAEFAPGRLGVDMQMICMGGKERTKQEWECLLHKAGFTLHNIIPIMANESIIVAYPY
Caulophyllum robustum	(RS)-norcoclaurine 6-O-methyltransferase	6OMT	>CroG43049T	MKMQKEQDVSGQAKIWNYIYGFSDSMLLRCAVDLDIANIIHNHEKPITLSELASKLPVQPVKLESLYRVMRHLVHMKLFTKTKVDGEIVYGLAPPAKFLVKGEKSMVNLVLGFSDKDLMSPWHYIKDAVAGETAFEKALGMEVWTYLGKHEEKSQLVNEIMASDTKLVMSAFLNKCKDKFIGITSLVDVAGGTGTAVWNIAKAFPHIKCTLYDLPHVIADSPAYPEIDRVAGDMFKYIPSADAILMKYILHDYDDEKCIQILKKCKKAVSEDGGKVIIIDIVLNVDSKHPLTKFRVSSDLDMMLTTGGGKERTKEEWKKLFKAAGYKGYNITEISAIQSVIEAFPY
Caulophyllum robustum	(RS)-norcoclaurine 6-O-methyltransferase	6OMT	>CroG43050T	MEATEQQEVSAASVADQAKLWNYIYGFSESLVLKCAVELNIANLIQTNRNAMTLSELSSKLPSINPNSLYRLMRHLTHIKLLTKTKLNTQTIYSIAPAGNFLVTGWDKCMTGAILGITDKEFMEPWHYIKDALTGNDAFKAALGMNIWDYMGKYPEKNQLFNEAMACDTRLAMSALVNECKGVFKGVKTLVDVGGGTGTAVMNIAKAFPSIQCSVYDLAHVIADSNAFPEINRVAGDMFEHIPNADAILMKCILHDWSDEECIQILKKCKKAVPKNGGKVIIVDIVLDVESQHPYTKMRLTLDLDMMLNTGGGKERTEEEWKKLIYAAGFTSYNITQISAAQSVIEAFPY
Caulophyllum robustum	(RS)-norcoclaurine 6-O-methyltransferase	6OMT	>CroG43051T	MEEKKEQDVSDQAKMWNYIYGFSETLVLRCATELDIATIIHSHGKPITLSDLASKLPVQPVNSGSLYRVMRCLVHMKLFTKTKVDGEIVYGLAPPAKFLVKGLDKCMVGIILGITEKDLMSPWHYIKEALTGEKAFEKAFGMNIWTYLGMHEEKSQSFNEIMVSDTKLVMSALVNEGKDKFIGITSLVDVGGGTGTAVWNIAKAFPHIKCTVFDLPHVIADSVAYPEINRVAGDMFNYIPSADAILMKSILHGFDDAECTQILKKCKKAVPKDGGKVIVIDIVLNGESEHPYTKMRVTMDMDMMIATEGGKERTEEEWKKLFDAVGFRSYKISQISALQSVIEAFP
Caulophyllum robustum	(RS)-norcoclaurine 6-O-methyltransferase	6OMT	>CroG43052T	MNIWTYLGMHEEKSQSFNEIMVSDTKLVMSALVNEGKDKFIGITSLVDVGGGTGTAVWNIAKAFPHIKCTVFDLPHVIADSVAYPEINRVAGDMFNYIPSADAILLKYILHDFDDEECTQILKKCKKAVPKDGGKIIIIDIVLNVESEHPYTNMRVTMDIDMMIGTGGGKERTEEEWKKLFGAAGFRSYNISQISALQSVIEAFPY
Caulophyllum robustum	(S)-coclaurine N-methyltransferase	CNMT	>CroG16388T	MTTSVEALMEIPYNVSVRTMLGLLERNVLPDAIVRRSTRFLLASRLRSGYRSSSDLQLADLLTFVNSLRDMPIAIKTDKPKAQHYELPTSFFELVLGKNMKYSCCYFLDKSNTLEETEIAMLDLYCERAQIKDGHTVLDVGCGWGSLSLFFARKYSNCKITGICNSTTQKAYIEEQCRHLQLQNVEIIVADISTFEMENSFDRIFSIEMFEHMKNYGELLKKISKWMKQDSLLFVHHFCHKAFAYHFEDTSEDDWITRCFFTGGTMPSANLLLYFQDDVSIVNHWLVNGKHYAQTSEEWLKRMDQNMVTIKPIMESTYGKDSAVKWIAYWRTFFISVAELFGYNNGDEWMVTHFLFKKK
Caulophyllum robustum	CYP80B3-like	NMCH/CYP80B3	>CroG36880T	MRMRLETKMVVKSMSRTKWGWGLILIPFLLLLNDHLTRKRLPPGPWPWPVIGNLLQLGEKPHTEFAKLAQKYGDLFTLRLGSQTVVVASSPASAADILKTHDKTLSGRYVFQSFRVKEHVENSIVWCQCNENWKMLRKVCRTELFTPKMIESQAGVREEKALEMVKFLKGKDGQPVKVAEVVFGTLVNIFGNLIFSQDIFDLNDPTSGSVEMKEQLWKMLELGNTTNPADYFPFLGRFDLFGQRRAVAQCLQQIYDVWGVMLKERRRNEATSHDFVNVLINAGLDDQKINALLMELFGAGTETSASTIEWAIAELTKNPRVAKKIRQEMMNVLGKQTVVKESHILHLPYLQAFVKETLRLHPPTPLLLPRRALETCQVMGYTIPKECQIMVNAWAIGRD…
Caulophyllum robustum	Berberine bridge enzyme-like 15	BBE	>CroG53151T	MAKMVLPTLALLVFLFSSISPSTSDSFSDNFISCFKKNSNILYAPNNSSFSSILQFSIQNLRFMSSATSKPRFIVTPQNESHIQAAVICSKKSGLQIRVRSGGHDYEGLSYTSNKPFIVVDLIKFRQITINMKDKTAWVQAGATVGELYYRIAEKSSTYGFPAGICSTMGVGGHISGGGIGTMMRKYGISGDNIVDAFVVDVNGRLLDRKAMGEDLFWAIRGGGGASFGVIVSWKVQLVPVPKTVTVFGVQRTLAQGATALVSKWQGIAAKIQKNLFIRLVIQTAQVNGATSIQVLFQSLFLGNVTQLLPIMKSYFPELALEAKDCTEMSWISSVLYFNGFPIGQSVDILLNRSQQSSRYFKAKSDFVKEPISSTALEGIWKVLIKEQRPLMIWEPLGG…
Caulophyllum robustum	Berberine bridge enzyme-like 26	BBE	>CroG33769T	HTNKAGQYKETVSLTNISEAKMSFPALALLVFFFSSISLSTSDSFYKNFITCFIQNSIPSPQINNILHSPNDSSYSSIFLFTVKNFRFISPTISKPQFIITPQHESHIQGAVICSKNNGLRIRVRSGGHDYEGLSYTSNKPFIIIDLTKFRQINVSMDDKTAWVQAGASIGEVYYRIVEKTNTHGFPAGICPTVGVGGQISGGGIGTIMRKYGLAADNVIDAFVVDVRGRLLDRQSMGEDLFWAIRGGGGASFVVIVSWKIKLVPVPPTVTVFGVQRTLAQGATALVRKWQDIAANIHEDVFFRLVIQPVPVNEVMTVRVTFQSLFLGSASQLLPIMRDNFPELALEAKDYIEMSWINSILYFNNLPSGQSLDVLLNRSHQTYERHFKGKSDFVTKPIS…
Caulophyllum robustum	Berberine bridge enzyme	BBE	>CroG48747T	MQTYTTNTKNKPTMCTSTTQIFFFLFVCTLTSTLCDDVTLSSSLSFCLSSKGISNFTSFSSFSDSNYHKFLYVTMQNQIFTRPTYPRPSVIILPETKEQLANAIICCRSGGWTIRLRSGGHSYEGLSYLADTPFVVIDLMNLNRVSIDLESQTAWVESGATLGEIYYAIGESTETLGFSGGYCPTVGSGGHISGGGFGMMSRKYGLAADNVVDAIIIDADGEVLNRESMGEEVFWAIRGGGGGVWGAIFAWKIQLVEVPKYVTVFKLMKHMRSIEEAAKLLHKWQLVAPGLEDDFTLSVLTGADEDGTWFMFLGLYLGPTEMAVSTLECQFPELNLVHDDCMEVSWIEAFAYLAGLNSVVDMNNRFLKYDDRAFNTKVDLVKDPISLEGIHGALKMLSK…
Caulophyllum robustum	Berberine bridge enzyme-like 15	BBE	>CroG53151T	MAKMVLPTLALLVFLFSSISPSTSDSFSDNFISCFKKNSNILYAPNNSSFSSILQFSIQNLRFMSSATSKPRFIVTPQNESHIQAAVICSKKSGLQIRVRSGGHDYEGLSYTSNKPFIVVDLIKFRQITINMKDKTAWVQAGATVGELYYRIAEKSSTYGFPAGICSTMGVGGHISGGGIGTMMRKYGISGDNIVDAFVVDVNGRLLDRKAMGEDLFWAIRGGGGASFGVIVSWKVQLVPVPKTVTVFGVQRTLAQGATALVSKWQGIAAKIQKNLFIRLVIQTAQVNGATSIQVLFQSLFLGNVTQLLPIMKSYFPELALEAKDCTEMSWISSVLYFNGFPIGQSVDILLNRSQQSSRYFKAKSDFVKEPISSTALEGIWKVLIKEQRPLMIWEPLGG…
Caulophyllum robustum	(S)-scoulerine methyltransferase	SOMT	>CroG44053T	MDTQNSPNYLSTLGLARLICLPMALRAAIELNVFEIISQAGPNSHLSSSQILAKIPTNNPNASIALDRILRLLAANSFLSVSTNSSNQTLYGLTNESICFVAKDDQVSVVPMVLFTYDKAVVESLYMLKDCVLEQGCIPFDKTHGVNFFEYAAKEPKVSKVFNQAMAVGSSITFDEVFKVYKGFDGMKELLDVGGGIGTSLSTIVTKYPHIKGINFDLDYVIAVAPSFPGLFLTPFLFFSYNHHHRRCCY
Caulophyllum robustum	(S)-scoulerine methyltransferase	SOMT	>CroG44055T	MATEDSPSYLSALGLSRLICLPMALRAAIELNVFEIISQAGPKAHLSSSQILSKIPTKNPNASIALERILRMLGASSILSVSTNESNQSLYGLTSESSCLVTKGDQVSVVPMLLFTADKAVVESFYMLKDVVLEEGIIPFDKTHGVNFFEYAGKEPRVNKCFNQAMAAGSIIAFDEVFKVYKGFDGMKELVDVGGGIGTSLSNIVTKYPHIKGINFELDHVVGDAPNYPG
Caulophyllum robustum	(S)-scoulerine methyltransferase	SOMT	>CroG44058T	MDTQNSPNYLSTLGLARLICLPMALRAAIELNVFEIISQAGPNSHLSSSQILAKIPTNNPNASIALDRILRLLAANSFLSVSTNSSNQTLYGLTNESICFVAKDDQVSVVPMVLFTYDKAVVESLYMLKDCVLEQGCIPFDKTHGVNFFEYAAKEPKVSKVFNQAMAVGSSITFDEVFKVYKGFDGMKELLDVGGGIGTSLSTIVTKYPHIKGINFDLDYVIAVAPSFPGLFLTPFLFFSYNHHHRRCCY
Caulophyllum robustum	Canadine synthase	CYP719A1	>CroG07049T	MELTLWVVSVLIMFVMAIVFQTTTKPSSSSSTKWPPGPKTLPIIGNLHQLSGEVLHVALAKLAKVHGNVMTVWIGSWRPLIVISDFQTAWEVLVTKSSDYSARDLPEITKIASASWQNISSSNSGPFWHNLRKGLQNGPLGPHSVMSQIHFQEKDIDRMIRDMENEARKNGGIVKPLDNLKKVTVRLLTRLIFGQNFDDDSFIESIHLETEELMRISGYAGLADAFSYAKYLPSHKKAVKEIYEGKARVEELVRPFLSSNPPSNSYLNFLLSQDYPEEVIIFCIFEVYLLGVDSTSSTTAWALAFLIREQAVQEKLSQHIKSITDEDDRIKTVDLQKLDYLQAVMKETMRMKAIAPLAIPHTTAKETSLMGNKVAKGTRVMVNLYALHYNDKIWTEPYK…
Caulophyllum robustum	Tetrahydroprotoberberine oxidase	STOX	>CroG27540T	MFYLIPTLVILTTQSDSVDVKFLQCLDLHSKISILVYTPNTSSYSSILESTIYNLRILSSATPKPMYIITPMDESHVQTTLVCCKKHGLQLRVRSGGHDFEGSSSTSSVPFVILDLIHLKSINVDIQDNSAWVQAGATIGELYYRIAEKSRVHAFPAGLCPTVGVGGHISGAGYGILLRKHGLSADHILDAHIMNADGEILDRKSMGEDLFWAIRGGGGASFGVILSWKIELVPVPPTVTIFIVPKTLEQGATAILHKWQFIADNVDEDLFIGL
Caulophyllum robustum	Tetrahydroprotoberberine oxidase	STOX	>CroG27541T	LEQGASTILHKWQFITDNVHEDLFIGLSIRPENMNMDDPKQGKTILVSFMGIFLGGPEKLLQHMDDKFPELGLKPHDCIKTSWIKSAAVFGVFSTDVTLNVLLDRKNPFPPKSFHRVKSDYVTEPLPVNVLEEIWRRFLEMGVEMPEIIMSPYGGRMNEISESEIPFPHRKGNIYKINYIIEWLDQGDDASKKHTSWIRELYSYMTPYVSKSPRASYLNFKDIDLGHTKNGTASYSEAYKAWGSKYFKEIGACEDQG
Coptis chinensis	Tyrosine decarboxylase	TYDC	>Coptis|KAF9586943.1	MGSLHADNLENSCIENPLDPEEFRRQGHMMIDFLADYYRDVEKYPVRSQVEPGYLRKLLPESAPYNPEPIETILQDVQTQIVPGITHWQSPNYFAYFPSSGSIAGFLGEMLSTGFNVVGFNWMSSPAATELESIVMDWLGKMLKLPKSFLFSGNGGGVLQGTTCEAILCTLTAARDRMLNKIGRENICKLVVYGSDQTHCALQKAAQIAGIHPKNFRAVPTTKTNSFGLTPDALRSTILADIEAGLVPLFLCATVGTTSSTAVDPIGPLCEVAKDYWIWVHVDAAYAGSACICPEFRHFIDGVENADSFSLNAHKWFFTTLDCCCLWVKEPSALVKALSTNPEYLRNKATDSKQVVDYKDWQIALSRRFRSMKLWLVLRSYGVANLRNFLRSHVKMAKN…
Coptis chinensis	Tyrosine decarboxylase	TYDC	>Coptis|KAF9588975.1	MGSLPTDVLENNFACSANPLDADEFRRQGHLVIDFIADYYQNIEKLPVRSQVEPGYLKKRLPESAPYNPEPIELILKDVQNDIMPGITHWQSPNYFAYFPSSGSIAGFLGDMLSTGFNVVGFNWMSSPAATELESIVMDWLGKMLKLPESFLFSGNGGGVLQGTTCEAILCTLIAARDRMLNKIGRENIHKLVVYGSDQTHCAMQKAAQIAGIHPKNFHAIPTSKSNAFALPVESLRSAIIFDIQAGLVPLFLCATVGTTSSTAVDPVGPLCDIAKDYNIWVHVDAAYAGSACICPEFRHFIDGVENADSFSLNAHKWFFTTLDCCCLWVKDPSSLVKALSTNPEYLKNKATESKQVVDYKDWQIALSRRFRALKLWLVLRSYGVANLRNFLRNHVRMA…
Coptis chinensis	Tyrosine decarboxylase	TYDC	>Coptis|KAF9588974.1	MGSLPTDVLENNFTCPANTLNPDEFRRQGHMVIDFIADYYQSIEKRPVRSQVEPGYLKKRLPESAPYNPESIEQILKDVQNEIMPGITHWQSPNYFAYFPSSGSIAGFLGEMLSTGFNVVGFNWMSSPAATELESIVMDWLGKMLKLPESFLFSGNGGGVLQGTTCEAILCTLTAARDRMLNKIGRENINKLVVYGSDQTHCAMQKAAQIAGIHPKNIHAIATSKSNAFALPVESLRSAILSDIQAGLVPLFLCATVGTTSSTAVDPVGPLCDIAKDYNIWVHVDAAYAGSACICPEFRHFIDGVENADSFSLNAHKWFFTTLDCCCLWVKDPSSLVKALSTNPEYLKNKATESRQVVDYKDWQIALSRRFRALKLWLVVRSYGVANLRNFLRNHVRMA…
Coptis chinensis	Tyrosine decarboxylase	TYDC	>Coptis|KAF9608166.1	MNSIQNDIQEKFASPSNLLDPEEFKRQGHMIIDFLADYYKNIHKYPVRSQVKPGYLKNRLPESAPNDAEPIESILKDIQNDIIPGLTHWQSPRYFAYFPFSTSIAGFLGEMLSAGLCVNAFSWITSPAATELESIVMNWLGKMLSLPESFLFSGNGGGVLQGTASEAILCTIIAARDRMLNKIGRANICKLVVYGSDQTHSCVQKGAHIAGIHPKNFRAIATSKSNAFSLPVESLRSTILADIEAGLVPFFLCATVGTTTSTAVDPVGLLCHVAKDYNIWVHVDAAYAGSACICPEFRHFIDGVENVDSFSFNAHKWLFTNFDCCCLWVRDPSALIKALSISPEYLKNKETESKQVVDYKDWQIGLSRRFRALKLWLVLRSYGVANIRNFLRSHVRLAK…
Coptis chinensis	Tyrosine decarboxylase	TYDC	>Coptis|KAF9593414.1	MVFYGWAPLPLVCLASGGSFGGHLQRAKATLFTTTEKQKIRESAENTCIDSGLMTRADGKLRDGARMMLRSHVRFSRREWLPIGASTNHHRSIPLWGHPLLYHYYRGTTDLQISLTTEFSERRQIFLWIASFASFAVKVPMNIMLFVYQCMHACTPSSMLSTGFIVVGFNWMSSPAAIELESTIMDWLTKMLKLPKFFLFSGNIWLGCVAMGYL
Coptis chinensis	Tyrosine aminotransferase	TYDC	>Coptis|KAF9611565.1	MENGGAKKECAFEKENGCGGGGGGVMKKKWCFKANESISSASGITIRGTLAMLMGSRNLNDSRETIPLGHGDPSAFPCFKASLVAEDAIVESLRSAKFNSYSPSVGIQPARSAVAQYLSRDLTYKLSAQDVFLTVGCIQSIEVVVSVLARPGANILLPRPGFPIYESRANFSHLEIRHFDLLPESGWEVDIDQIKVLADENTVAIVMINPGNPCGNVLSYQHMKKIAETAKKLGILIISDEVYGHLTFGDKKFIPMGVFGSIAPVLTVGSISKKWIVPGWRLGWIAVNDPNGFLKEAKIVEGIIGYMNISTDPATFIQAAVPRILEDTTEEFFKNTISILRESAEICYDEINEINCIYCPHKPDGSMFVMVKIDTSLLEDIIDDIDFCTKLAKEENVIV…
Coptis chinensis	Tyrosine aminotransferase	TYDC	>Coptis|KAF9590154.1	MVSYKLHSILKKNKTKTLLSPLTKQPRKMGEANGGGGGGGEVIEWKFSGNEKINTAAGITIRGILDVLMKLLSPSNGIKPIPLGHGDPSVFACFRTSEVAEDAIVEALKSAKFNSYSPTVGLLSARRAVAEYLSHDLPYKLSPDDVFLTVGCTQAIEVALTVLARPGANILLPKPGFPYYEARASFTDLEYRHFDLLPEKGWEVDLNAIEALADENTVAMVIINPGNPCGNVASYQHLKKVAETARRLGIVVIADEVYGHLAFGSNPFVPMGVFGSIVPVLTLGSISKRWIVPGWRVGWLVTSDPNGVLKKTKITECITGCLNISADPATFIQGAVPHILEKTKEDFFNKIISLLRQSADICYDEIKDINCITCPHKPEGSMFVMVRLNTSLLEDISDD…
Coptis chinensis	Tyrosine aminotransferase	TYDC	>Coptis|KAF9606880.1	TSEVAEDAIVEALKSAKFNSYSPTVDLLPARRLVAIYNSLLAGLLLLPLVPAAAGVAAAAMDLLVLVATGCCCCGAGLAALGGHSLLPWSWLIDACLSASWYLCMKEALEATKVLIEDCRLRGIVHLSLGFFLGDYRPLIQDTHGNVLDQYKKDGENDDPYGSASRGNWRQGSLYY
Coptis chinensis	Tyrosine aminotransferase	3OHase	>Coptis|KAF9588975.1	MGSLPTDVLENNFACSANPLDADEFRRQGHLVIDFIADYYQNIEKLPVRSQVEPGYLKKRLPESAPYNPEPIELILKDVQNDIMPGITHWQSPNYFAYFPSSGSIAGFLGDMLSTGFNVVGFNWMSSPAATELESIVMDWLGKMLKLPESFLFSGNGGGVLQGTTCEAILCTLIAARDRMLNKIGRENIHKLVVYGSDQTHCAMQKAAQIAGIHPKNFHAIPTSKSNAFALPVESLRSAIIFDIQAGLVPLFLCATVGTTSSTAVDPVGPLCDIAKDYNIWVHVDAAYAGSACICPEFRHFIDGVENADSFSLNAHKWFFTTLDCCCLWVKDPSSLVKALSTNPEYLKNKATESKQVVDYKDWQIALSRRFRALKLWLVLRSYGVANLRNFLRNHVRMA…
Coptis chinensis	Tyrosine aminotransferase	3OHase	>Coptis|KAF9586943.1	MGSLHADNLENSCIENPLDPEEFRRQGHMMIDFLADYYRDVEKYPVRSQVEPGYLRKLLPESAPYNPEPIETILQDVQTQIVPGITHWQSPNYFAYFPSSGSIAGFLGEMLSTGFNVVGFNWMSSPAATELESIVMDWLGKMLKLPKSFLFSGNGGGVLQGTTCEAILCTLTAARDRMLNKIGRENICKLVVYGSDQTHCALQKAAQIAGIHPKNFRAVPTTKTNSFGLTPDALRSTILADIEAGLVPLFLCATVGTTSSTAVDPIGPLCEVAKDYWIWVHVDAAYAGSACICPEFRHFIDGVENADSFSLNAHKWFFTTLDCCCLWVKEPSALVKALSTNPEYLRNKATDSKQVVDYKDWQIALSRRFRSMKLWLVLRSYGVANLRNFLRSHVKMAKN…
Coptis chinensis	Norcoclaurine synthase	NCS	>Coptis|KAF9588974.1	MGSLPTDVLENNFTCPANTLNPDEFRRQGHMVIDFIADYYQSIEKRPVRSQVEPGYLKKRLPESAPYNPESIEQILKDVQNEIMPGITHWQSPNYFAYFPSSGSIAGFLGEMLSTGFNVVGFNWMSSPAATELESIVMDWLGKMLKLPESFLFSGNGGGVLQGTTCEAILCTLTAARDRMLNKIGRENINKLVVYGSDQTHCAMQKAAQIAGIHPKNIHAIATSKSNAFALPVESLRSAILSDIQAGLVPLFLCATVGTTSSTAVDPVGPLCDIAKDYNIWVHVDAAYAGSACICPEFRHFIDGVENADSFSLNAHKWFFTTLDCCCLWVKDPSSLVKALSTNPEYLKNKATESRQVVDYKDWQIALSRRFRALKLWLVVRSYGVANLRNFLRNHVRMA…
Coptis chinensis	Norcoclaurine synthase	NCS	>Coptis|KAF9625886.1	MTNERKFGGSLPVENVQALAAKELKDIPDHYVRPELDSDVISIDESLEIPVIDLSRLLDQQFACEELAKLHAACQDWGFFHLINHSVPEIVIENMKIDTQEFFRLPLDEKRAYAQLPDSIEGYGQAFVVSEEQKLDWGDMLFFLTLPVHFRDMRFWPTSPTSFRETTEKYSIELQRVTVCLLGSMAKNLGLEPEKLTNMFQMDGSQSLRMNYYPPCPHADKVLGLSPHSDATGLTLLLQINDVQGLQIKKGGNWVPVKPLSGAFIVNVGDTIEIFSNGIYESIEHRAVINSDKERLSIAAFHEPRFGTTIGPLPDLVKENRERYKTLRYEDYLGHIITSKLDGKSLLEHMKL
Coptis chinensis	Norcoclaurine synthase	NCS	>Coptis|KAF9607126.1	MSKNFTDVGGSLPVENVQALASKELKNLSDRYIRPELEHDDVVPTDNSLEIPVIDLSRLLDQQYACDELAKLHSACLDWGFFQLINHGVREEVIEKMKVDTEDFFRLPLKEKKAYSQLPDGMEGYGQAFVTSEEQKLDWADLHFIITKPVQERKMRFWPTNPTSFRETMEKYSTELQKVAMCLTGMMAKNLGLESDLLMKPFENCIQSVRLNYYPPCPHAKKVLGLTPHSDATGLTLLVQVNEVNGLHIKKDEKWVPIKPILGAFIVNIGDAIEIMSNGIYKSIEHRAVINTDKERLSIAAFHDPEYGTKIGPLPDLVKENGAKYKSIDYEDYLIRLSNNKLDGKSLIDQMKL
Coptis chinensis	Norcoclaurine synthase	NCS	>Coptis|KAF9620427.1	MSKNLSGVGGSLPVENVQVLASEELKTLPDRYVRPELEHDDVVPTDNSLEIPVIDLSRLLDQQYACDELAKFHSACLDWGFFQLINHGVREEVIEKMKVDTEDFFRLPLKEKNAYSQLPNGMEGYGQAFVTSEEQKLDWADMHFLITKPVQERNMRFWPTSPTSFRETMEKYSMELQKVAMCLTGMMAKNLGLESEILTKPFENCTQTVRMNYYPPCPHAEKVLGLSPHSDATGLTLLVQVNEVNGLHIKKDEKWVPIKPILGAFVVNIGDVIEIMSNGIYKSIEHRAVINPNKERLSIAAFHDAEYGTKIGPLPDLVKENGVKYKTIDYEDYLMRSSNIRLDGVLMDKTGSDKTKKLNFQAFF
Coptis chinensis	Norcoclaurine synthase	NCS	>Coptis|KAF9604122.1	MTKNLISLGGSLPVDNVQALAGTELKDVPDRYVRSELEYDNDVVSTDNDVEIPVIDLSRLLNQKSASDELAKFHSACLDWGFFQLINHGVSEEVIEKMKVDMEDFFRLPLEEKKVYGQLPDSTEGYGQSFVKSDEQKLEWADMHLLITNPVKERNMRFWPNNPTSFRESVNKFSKDVQEVAMCLIGLMARNLGLESQVLTKPFENCIQAVRMNYYPPCRYSDKVLGLTPHSDASSLTLLLQVNQVNGLQIKKNGKWFPVQPILGAFVVNIGDILEIMTNGVYKSIEHRVVINPDKERLSIAVFHDPEFSAIIEPVQDLVKKHGARYKTVRHADFLNQSINNKLDSKTFLDQFKL
Coptis chinensis	Norcoclaurine synthase	NCS	>Coptis|KAF9622570.1	MEKYSMELQKVAMCLTGMMAKNLGLESEILMKPVENCIQTMRMNYYPPCPHAEKVLGLSPHFDAVGLTLLVQVNEVNGLHIKKDEKWVRIKPILGAFVVNIGDVIEIMSNGIYKSIEHRAVINTDKEHLSIEAFHDPEYGTKTGLLPDLVKENGVKYKTIDYEDYLIRSSNIKVDGKSLLDKMKL
Coptis chinensis	Norcoclaurine synthase	NCS	>Coptis|KAF9622544.1	MTKNLISLGGSLPVDNVQALAGTELKDVPDRYVRSELEYDNDVVSTDNDVEIPVIDLSRLLNQKSASDELAKFHSACLDWGFFQLMNHGVSEEVIEKMKVDMEDFFRLPLEEKKVYGQLPDSIEGYGQAFVKSDEQKLEWADMHLLITIPFKERNMRFWPNNPTSFRESVNKFSKDVQEVAMCLIGLMARNLGLESQVLTKPFENCIQSVRMNYYPPCRYSDKVLGLTPHSDASSLTLVLQVNQVNGLQIKKNGKWFPVKPILGAFVVNIVQIRHFRVWESLKALLHGYFIFSVVSRVAVSNTPVSACPTRTHNPDTTPTLLQIFALYHIVDVQIMTNGVYKSIEHRVVINPDKERLSIAVFHDPEISAIIEPVQDLVKKHGARYKTVRHADFLNQSIN…
Coptis chinensis	Norcoclaurine 6-O-methyltransferase	6OMT	>Coptis|KAF9604125.1	MDTPKPYQNDEIKAQAEVWKHMYGFAKTIMLRSTISLGIPDIIDNNGPVTLSQLATHLPLKSISIDRFHHFMRYLVHMKLFTISTDHITKEDKYELTPASKLLVQGHQKSLAPYVMLQTHPEGFSIWSHVIDVLDGKKPYWESTYGISMYQKTEGDPEINEILNDAMTSHSKFMLPALVSGLMKENVLDGVASIVDVGGNSGVVAKAIVDAFPDVKCSVMDLNHVIESVIKDPKLDYVAGDMFTSVPNADAILLKSTLHNYEDDDCIKILRKAKEAIPSSGGKVILVEIVVDIENLPQFTAARLSMEVDMMLMGGKERTKKEWEDLLRKASFTYHQVIPIMAIESIIVAYS
Coptis chinensis	Norcoclaurine 6-O-methyltransferase	6OMT	>Coptis|KAF9606078.1	MEVKKDNLSSQAKLWNFIYGFAESLVLKCAVQLDLANIIHNNGTSMTLSELSSRLPSQPVNEDALYRVMRYLVHMKLFTKASIDGELRYGLAPPAKFLVKGWDKCMVGSILAITDKDFMAPWHYLKDGLAGESGTAFEKALGMNIWGYMAEHPEKNQLFNEAMANDSRLIMSALVKECGNIFNGITTLVDVGGGTGTAVRNIANAFPHIKCTVYDLPHVIADSPGYSEVHCVAGDMFKFIPKADAIMMKCILHDWDDKECIEILKRCKEAVPIEGGKVIIVDIVLNVQSEHPYTKMRLTLDLDMMLNTGGKERTEEEWKNLIHDAGYKGHKITQITAVQSVIEAYPY
Coptis chinensis	Coclaurine N methyltransferase	CNMT	>Coptis|KAF9616998.1	MTMDGLIKVPYNATVKMMLASLERGLLPDLIVRKLTKLLLSTRLRDGYKPTSQEQLDHLLQFAHSLQDMPIAIKTETPKSQHYELPTSFFNMVLGKNMKYSCCYFLDNSSTLEDAEKAMLDLYCERAQIKDGHTVLDIGCGWGSLSLFIAQKYINCKVTGICNSTTQKAYIDSQCRDLQLQNVEIIVADISTFEMDASFDRLFSIEMFEHMKNYKELLKKVSKWMKQDSLLFVHHFCHKSFAYHFEDTNDDDWITRYFFTGGTMPSANLLLYFQEDVSVVNHWLVNGKHYAQTSEEWLKRMDLNLTSIKPIMEKTYGKDSAVKWTAYWRTFFISVAELFGYNNGEEWMVVLFLFKKK
Coptis chinensis	N methylcoclaurine 3 hydroxylase, CYP82B subfamily	CYP82B	>Coptis|KAF9606077.1	MEVVSIAIVSFSFLLFLFFILRDPRQKNLPPGPRPSPIVGNLLQLGDKPHAEFAKLAQKYGQLFSLKLGSQTVVVASSPAAAAEVLKTHDKILSGRYVFQSFRVKEHIENSIVWSECNDNWKLLRKVCRTELFTPKMIESQSEIREGKAREMVKFLRSKEGEVVKIVEVVFGTLVNIFGNLIFSKDVFDLEDPTGGSVELKEHLWKLLEMGNSTNPADYFPIMGKYDLFGQRRAVAEVLQQIYDVWGINLKERRGMKGSESNNDFVDVLLNAGLEDQKINALLMELFGAGTETSASTIEWAITELTKKPLVVSKIRLELVNVVGDNTVKESDLPHLPYLQAFVKETLRLHPPTPLLLPRRALETCTVMNYTIPKECQIMNFEWSLPQGMSTSELSMDEK…
Coptis chinensis	3’‐hydroxy‐N‐methyl‐(S)‐coclaurine 4 o methyltransferase	4OMT	>Coptis|KAF9623934.1	MAFHGKDDALDIKAQAHVWKIIYGFADSLVLRCAVELGIVDIIDNNNQPMALADLASKLPVSNVNCDNLYRILRYLVKMEILRVEKSDDGEKKYALEPIATLLSRNAKRSMVPMILGMTQKDFMTPWHSMKDGLSDNGTAFEKAMGMTIWEYLEGHPDQSQLFNEGMAGETRLLTSSLISGSRDMFQGIDSLVDVGGGNGTTVKAISDAFPHIKCTLFDLPHVIANSYDHPNIERIGGDMFKSVPSAQAILLKLILHDWNDEDSIKILKQCRNAVPKDGGKVIIVDVALDEESDHELSSTRLILDIDMLVNTGGKERTKEVWEKIVKSAGFSGCKIRHIAAIQSVIEVFP
Coptis chinensis	Berberine bridge enzyme	BBE	>Coptis|KAF9596880.1	VQAAVICSKTQGLLIRVRSGGHDYEGLSYLSEKPFIIIDFVHFQEIALDIEDKTAWVQAGATVGQVYYRIAEQSSTLGFPAGVCPTTAVGGHISGGGLGFLMRKYGLAADNILDALFIDVNGKLLDRKSMGEDLFWALRGGGGASFGVIVSWKIKLVSVPSVVTVCNVYKTLEQGATSLFYKWQNVAHEFPEDLFMRTVVQPVDGAFNRTIQVLFQSLFLGSVQEQLPLMEISFPELGLEAKDCTEMRWISSVLKVANLDGQPAVVLLNRSQQSKKYFKGKSDFVKEPISITELESIWKVMLGEEISPMMICDPFGGMMDEILESAIPFPHRVGNLYTIQYLIEWKEEGINAVAKHLEPTRRLYNYTTPYVSKSPRSSYFNYKDLDLGMNRDIETSYLE…
Coptis chinensis	Berberine bridge enzyme	BBE	>Coptis|KAF9587575.1	PKPELIVTPLHESHVQAAVICSRKYGMHIRVRSGGHDYEGLSYATGVPFVIVDLINLQSISVDAKDGTAWVSSGATIGQLYYRIAEQSRTYGFPAGICPTVGVGGHFSGGGYGALLRKYGLAADNVVDARLVNVDGKILTKESMGEDLFWAIRGGGGGSFGVILSWKIRLVPVPPTVTVFTHNKNLEQGATALVHRWQYVADKLPRDLFIRIVINVANSSRVGERTVQASFQSLFLGGVKQLIPLMEQHFPELGLKRDDYIEMSWIQSVLYFAGFPIEGPSDVLLDRNPLTRDYFKAKSDYVTEPISEKGLKGIWKLLLEENRPEVIFSPYGGRMNEISESAIPFPHRKGNIYKIQHLVYWAEEGTKAAKERIGWIRRLYRYLIPYVSKSPRAAYLNYR…
Coptis chinensis	Berberine bridge enzyme	BBE	>Coptis|KAF9587567.1	MGNSSFALVALFYTLLSLVSLATSSSLYDNFLQCTSLQSNSSIPIYTPNTASYSSVLQFSIRNLRFTSPNTPKPELIVTPLHESHVQAAVICSRKYGMHIRVRSGGHDYEGLSYATGVPFVIVDLINLQSISVDAKDGTAWVSSGATIGQLYYRIAEQSRTYGFPAGICPTVGVGGQFSGGGYGALLRKYGLAADNVVDARLVNVDGKILTKESMGEDLFWAIRGGGGGSFGVILSWKIRLVPVPPTVTVFTHNKNLEQGATALVHRWQYVADKLPRDLFIQIVINVANSSRVGERTVQASFRSLFLGGVKQLIPLMEQHFPELGLKRDDYIEMSWIQSVLYFAGFPIEGPSDVLLDRNPLTRDYFKAKSDYVTEPISEKGLKGIWKLLLEENRPVVIF…
Coptis chinensis	Berberine bridge enzyme	BBE	>Coptis|KAF9596876.1	MFISSTTPKPQFIVTPLTESHIQAAVICSKRYGFLIRVRSGGHDYEGLSYISHKAFIIIDLVKFQEINVNIADKTAWVQAGATVGQVYYRIAEQSNNTHAFPSGVCPTMGVGGHIGGGGLGFLMRKYGLAADNVVDAYFIDVKGRILNRKSMGEDLFWAIRGGGGASFGVIVAWKINLVPVPAVVTVCNIPKTLEQGATSLFHIWQNVAHKFDRNIFMRTIVQAVGAQKRRTIEVAFQSVFLGTIKELLPLMKISFPELGLGVKDCNEMSWVNSTLSVAGLTGNPVEILLNRSQRTKNYFKGKSDFVQNVISETDLESIWKVMLAQDISPMMIDEPLGGRMDEILESSIPFPHRVGNLYNIQYFMPWQNGSATTRYLEATKRLYNYMTPYVSKSPRASY…
Coptis chinensis	Berberine bridge enzyme	BBE	>Coptis|KAF9596877.1	MSFRSEFEVEAGHDYEGLSHTSQKPFVIIDLIKFRQAGATLGEVYYQIAKVSSTHGFPAGICPTVGIGGHISGGGIGTLSRKYGTAADNILNAYFIDVKGKLHDRKSMGEELFWALRGGGGASFGVIVSWKIKLVSVPSTVTVFNVHKKLEAGVTILLHKRQNVADKFHADLFVRAIIQAVDNETKKENYTSFISVSISWKGQRTTSTNENEFSDLGWKPKIALK
Coptis chinensis	Scoulerine 9’ O methyltransferase	SOMT	>Coptis|KAF9617444.1	MCTSLSELKYPVFSTKSRLLLEVALRTSVDMAAQEGVNYLSGLGLSRLICLPMALRAAIELNVFEIISQAGPDAQLSPSDIVAKIPTKNPSAAISLDRILRMLGASSILSVSTTKSGRVYGLNEESRCLVASEDKVSVVPMLLFTSDKAVVESFYNIKDVVLEEGVIPFDRTHGMDFFQYAGKEQRVNKSFNQAMGAGSTIAFDEVFEVYKGFDNLKELVDVGGGIGTSLSNIVAKYPHIRGINFELPHVIGDAPDYPGVEHVPGDMFEGVPNAQNILLKWVLHDWDDDRSIKILKNCWKALPENGTVIVIEFVLPQVLGNNAESFNALTPDLLMMALNPGGKERTTIEFDGLAKAAGFAETKFFPISQGLHVMEFHKINC
Coptis chinensis	Canadine synthase	CAS/CYP719A2	>Coptis|KAF9615084.1	MEMSPLLVCATVAIVFATTTIIRILFSSSSLPQMKWPSGPRKLPIIGNLHQLGDDVLHVALAKLAKVHGSVMTIWIGSWRPVIVISDLEKAWEVLVNKSADYGARDMPEITKIASASWHTISTSDAGPFWQNVRKGLQSGAMGPFNVAAQNQYQERDMKRLIKAMSDEAANNNGIVKPLDHIKRTLSDIIRISGYARLAEAFYYAKYLPSHKKAEREAFLVKCRVEELVRPLLSSNPPTNSYLYFLLSQNFEEEVIIFCIFELYLLGVDSTSSTTTWALAYLIREQGAQEKLYQDIRMTLGDVDLVKIEDVNKLKYLQGVVKETMRMKPIAPLAIPHKTAKETTLMGTKVAKGTRIMVNLYALHHNQNIWPDPYKFMPERFLEGETGTAYNKAMEQSFL…
Coptis chinensis	Canadine synthase	CAS/CYP719A2	>Coptis|KAF9615075.1	MSLANCSACKTTYITSEDTKWIAVLLECIFIYINYLPSVFAINSLLHSTITISTEMEGSFLWLIGSTVAIVLVITTIVRMSSSSSSSKKKWPGGPKRLPIIGNLHLLGDLLHVTLAKLAKVHGSVMTIWIGSWRPIIVISDINSAWEVLVSKSAEYGQRDTPEIFKTLTVGQNNISMSDIGPFWHNVRKGLQNGALSPLNVAAQTQFREEDVKRLIHEMSREALNKNGIIKPLDHMKKNTARLLGRLIFGPTFDNDKFVESMLYEIEDVLRLSGYARLTEAFYYAKYLPSQKKVAREAYLAKYRIEELVRPLLSSNPPTNSYLYFLQSQNYSKETIIFCTFELFLLGVDSTSSTATWALVIPDPRTSSPGEALRRY
Coptis chinensis	Canadine synthase	CAS/CYP719A2	>Coptis|KAF9615088.1	MKKNTARLLGRLIFGPTFDNDNFVESMLYEIEDVLRLSGYARLTEAFYYAKYLPIQEKLYEDIRMTIGDVDLVKIEDLSKLKYLQAVVKETMRMKPIAPLAIPHKTANDTTLMGTKVARGTQIMVNLYALHHNEDIWPEPYKFMPERFLQGEDGSANNKAMEQSFLPFGAGMRICAGMNLGKLQIAFALANLVNAFKWSCVDEEFQIEAEVYTLGSSSWRRVGEVPLLVPRRSNVLLNETLHWLAICEYQPSLTGIGCFDIKDEKFRFVPLASQIVPNTSVDFDLGVLGGCLSIIDYSKPEDIQLNS
Coptis chinensis	Canadine synthase	CAS/CYP719A2	>Coptis|KAF9615092.1	MLHPHVLSQATKWIAVLLEYISIYINYLPSVFAINSLLHSIVTISTEMEGSFLWLIGSTVAIVLVITTIVRMSSSWSSSKKKWPSGPKRLPIIGNLHLLGGDLLHVTLAKLAKVHGSVMTIWIGSWRPIIVISDINSAWEVLVSKSAEFGQRDTPEIFKIFTVGQNNIAMSDIGPFWHNVRKVLQNGALSPLNVAAQTQFEKRT
Coptis chinensis	Tetrahydroprotoberberine oxidase	STOX	>Coptis|KAF9595311.1	MMGISSLVVFPFLVFIAIANSLVPLASSSSEYEGFLQCLDLRSNSSIPVYNPSSTSYTSILHASIYNLRFISPTTPKPNFIITPMRESHVQATVVCSREHGLQIRTRSGGHDFEGSSSVAPVPFVLLDLIRLRTISVNIEDETAWVQTGATIGELYYRIAEKSRTHAFPAGLCPSVGVGGHISGAGYGILMRKYGLSADHVIDARLVDVNGRILDKESMGEDYFWAIRGGGGASFGVILAWKLRLVPVPPTVTTFVVPRLLEQGATALVHKWQIIADKLDDDLFLGLSVQALHLDPDHPEKKTIVISFLGFYLGAPEKALQLMEESFPELGLMKEDCIEMSWIKSALYFGIFQLENDLSLLLERKNPIPPKNRYMSKSDYVHEPVSEAVLEGIWKRFDG…
Coptis chinensis	Tetrahydroprotoberberine oxidase	STOX	>Coptis|KAF9589804.1	MRLPPFSLIFPLVSLLFSFSFATQNFEFVQCLESQNADFSISSSNILYTPQASSYSSILQISIQNLVFNSSTTLKPTFIITPLDESHVQATVICSSKHQLQLRIRSGGHDYEGLSYISNAPFVLIDLVNLRKVDVNLSDNTAWVQAGAILGEVYYSIFNQSKVHGFPAGVCPTIGVGGHISGGGQGTLMRKYGLAADNVVDAKIVDAKGNILDRRSPAGEDLFWAIRGGGGGSFGVILSWKITLVKVPPLVTIFTARRTLEQGAEELVNRWQQTADKFHEDLFIRVIISRANDSRGGKTVGAAFNSLFLGTIKELLPLMTNSFPELGLKAEECREMSWLETILYFDNGYPNGISIDSLLNRTRLNKPYFKAKSDFVKTPIPITGLKGLSELFLDDNAGI…
Coptis chinensis	Tetrahydroprotoberberine oxidase	STOX	>Coptis|KAF9596880.1	VQAAVICSKTQGLLIRVRSGGHDYEGLSYLSEKPFIIIDFVHFQEIALDIEDKTAWVQAGATVGQVYYRIAEQSSTLGFPAGVCPTTAVGGHISGGGLGFLMRKYGLAADNILDALFIDVNGKLLDRKSMGEDLFWALRGGGGASFGVIVSWKIKLVSVPSVVTVCNVYKTLEQGATSLFYKWQNVAHEFPEDLFMRTVVQPVDGAFNRTIQVLFQSLFLGSVQEQLPLMEISFPELGLEAKDCTEMRWISSVLKVANLDGQPAVVLLNRSQQSKKYFKGKSDFVKEPISITELESIWKVMLGEEISPMMICDPFGGMMDEILESAIPFPHRVGNLYTIQYLIEWKEEGINAVAKHLEPTRRLYNYTTPYVSKSPRSSYFNYKDLDLGMNRDIETSYLE…
Berberis koreana	Tyrosine/dopa decarxylase	TYDC	>KorG10514T	MGSLHAEDLENISACSQNPLDPEEFRRQGHMMIDFLADYYRDVEKYPVRSQVEPGYLRKLLPESAPYNPESIETILQDVQTQIVPGITHWQSPNYFAYFPSSGSVAGFLGEMLSTGFNVVGFNWMSSPAATELESIVMDWLGKMLKLPKSFLFSGNGGGVLQGTTCEAILCTLTAARDRTLNKIGREHIGKLVVYGSDQTHCALQKAAQIAGIHPKNFRAVRTFKDDAFGMTAKELRSVVDADIASGLIPLFLCATVGTTSSTAVDPIGPLCEVAKEHNIWVHIDAAYAGSACICPEFRHFIDGVENADSFSLNAHKWFFTTLDCCCLWVKDPSALVTALSTNPEYLRNKATESRQVVDYKDWQIALSRRFRSMKLWMVLRSYGVANLRNFLRSHVKMA…
Berberis koreana	Tyrosine decarboxylase 1	3OHase	>KorG12740T	MEKGKGLKPMDAEELRENAHKMVDFIADYYKSIENFPVLSQVQPGYLQELLPDSAPDHPEMFHNVLNDIQEKILPGVTHWQSPDYFAYFPSNSSTAGFLGEMLSAGLNIVGFSWITSPAATELEVIVLDWLAKMLKLPEDFLSHGQGGGVIQGTASEAVLVALLAARDKLLKRVGKNSLPKLVAYASDQAHASLQKACQIGGIHPENIRLLKTDSSTNYALSPDIVCDAICKDIAAGLLPFFLSATVGTTSSTAVDPLFELGKIAKAYDLWFHIDGAYAGSACICPEYRHYIDGVETADSFNMNAHKWFLTNFDCSVLWVKDRGALIQSLSTNPEYLRNKASQGNMVVDYKDWQIPLGRRFRSLKLWMVMRLYGVENLQSYLRNHITLAKHFEELVSSD…
Berberis koreana	Aromatic-L-amino-acid decarboxylase-like	3OHase	>KorG23110T	FNSVVFNCSSSPSSSELETVVIDWLARMLNLPNSFMFSGSGGGVLQGTTSEAILCTLIASRDRALKREGNINKLVVYGSDQTHSTLAKGCKIAGILPQNIRAIPTSKVDDFALSPTLVRTTIERDLHAGLVPIYICATVGTTSSTAVDPVGPLADLANNYNMWIHVDAAHAGSACICPEFR
Berberis koreana	Tyrosine aminotransferase	TyrAT	>KorG24514T	AGLIRIAAVLGNCYLGFFIPDYTAYNEMLSLFRNIAAIPIPLGEDDKYHMSPDKVAEEIARGTSVILTSNPRNPTGQMITNPELAQIQNICRDRATLIMDEFYCGYNYTTDCDGTVISSADNVEDVDEDDVLIIDGLTKRFRLPGWRVAWVLGPKEFIKAIGSCGSYLDGGCNVPFQEAAVSMLEPPRVRNEMR
Berberis koreana	Hydroxyphenyl pyruvate decarboxylase	HPPDC	>KorG22337T	LPVICIVGGPNSNDYGTNRILHHTIGLPDFSQELRCFQTVTCHQAVVNNLDDAHELIDTAISTALKESKPVYISISCNLPGIPHPTFNREPIPYFLEPRVSNQLGLEAAVEVTAEFLNKAVKPVLVCGPKIRVAKAYKAVMELADACGYPIAVMPAGKGMVPEQHPHFIGTYWGAVSTSYCGEIVESADAYVFIGPIFNDYSSVGYSLLIKKEKAVLVHPNRVTIGDGLSLGWVFMADFLSALAKRLKKNTTAMENYRRIYVPPGCPLKREEHELLRVNILFKHIQNMLSGDSAVIAETGDSWFNCQKLRLPENCGYEFQMQYGSIGWSVGATLGYAQAAKDKRVIACIGDGSFQVTAQDISTMIRCGQKTIIFINNGGYTIEVEIHDGPYNVIKNWNY…
Berberis koreana	Pyruvate decarboxylase 2	HPPDC	>KorG28937T	MSTQIGSLNSCNPTSNNVGCPNNHKVSTIQNHSSSSPLASAESTLGRHVARRLVQVGVSDVFSVPGDFNLTLLDHLLAEPGLNLVGCCNELNAGYAADGYARSRGVGACVVTFTVGGLSVINAIAGAYSENLPIVCIVGGPNSNDYGTNRVLHHTIGLPDFSQELRCFQAVTCYQAVVNNLEDAHEQIDTAISTCLKESKPVYISISCNLAAIPHPTFSREPVPFCIAPKVSNQMGLEAAVEATAEFLNKAVKPVMVAGPKLRVAKAQDAFVELADACGYPLAVMPSAKGLVPEHHPKFIGTYWGAVSTAFCSEIVESADAYIFAGPIFNDYSSVGYSLLLKKEKAIIVQPDRVVVGNGPTFGCILMKDFLPALAKKLKHNPTAYENYSRIYVPEGVPL…
Berberis koreana	Dopa decarboxylase	TYDC	>KorG10514T	MGSLHAEDLENISACSQNPLDPEEFRRQGHMMIDFLADYYRDVEKYPVRSQVEPGYLRKLLPESAPYNPESIETILQDVQTQIVPGITHWQSPNYFAYFPSSGSVAGFLGEMLSTGFNVVGFNWMSSPAATELESIVMDWLGKMLKLPKSFLFSGNGGGVLQGTTCEAILCTLTAARDRTLNKIGREHIGKLVVYGSDQTHCALQKAAQIAGIHPKNFRAVRTFKDDAFGMTAKELRSVVDADIASGLIPLFLCATVGTTSSTAVDPIGPLCEVAKEHNIWVHIDAAYAGSACICPEFRHFIDGVENADSFSLNAHKWFFTTLDCCCLWVKDPSALVTALSTNPEYLRNKATESRQVVDYKDWQIALSRRFRSMKLWMVLRSYGVANLRNFLRSHVKMA…
Berberis koreana	(S)-norcoclaurine synthase 1-like	NCS	>KorG27814T	MENEMSKPRELGGSLPVANVQALAAKDLKSVPERYLRPELQSDFVASIDNSREIPIIDLSRLLDEKFATEELVKLHSACEDWGFFQLINHGASEEIIEKMKIDIQEFFKLPLEEKKVYSQPPNSNEGYGQAFVVSEEQKLDWSDMLYLISLPEPERNLKLWPNNPASFRGTLHEYSLELKKVVGCLTGLMAKNLGVELDKFNNLFENCIQGIRMNYYPPCPNPDKVIGLSPHSDATGITLLIQINEVEGLQIRKDGNWVPIKPIPGAFIVNIGDIMEILSNGKYKSIEHRGVIDPKKERLSVAAFHGPNYNAMIGPFSELVKENGVRYKTVKHEDYVKQVISSKLDGKNTVDFMKLV
Berberis koreana	S-norcoclaurine synthase	NCS	>KorG39169T	MGEEIQHDDYDGRNQSVIPVIPRLDSLDSLIKYLQGKEENSSCWGTNRPCIPIDFALRETQDKGSILDRLSSLENRLFQLCLELEATNAPTSSMAYTSENTSSSRHGSSTDRSLSMRSLDERCLDDHPRCFHQALFNRFEFLGNSVNHRMDNTTQLNPLLETTTNSEGARKSKKSRFRRWKRLMGC
Berberis koreana	S-norcoclaurine synthase	NCS	>KorG50607T	MRGHVSNELDVALPAEHIWAIYSSPDLPRLIVELQPGVFKKLDVVKGHGGVGSVLDIELAPGSPGPLSWKEEFIKIDNETKTKVIHQIKGGFLDLGFSLYEVIFKIVAKDSNSCIIRSSVAFEVAEKFESNASLITAASFWGMAKAIANFADALQKKEQDCD
Berberis koreana	S-norcoclaurine synthase 2-like	NCS	>KorG51447T	MRKEFCLILFFSFLIYCNGLKNEMVNEMEVQGASADEIWAIYGSPDLPRLIVTLLPSVFESIQIIEGDGDLNTIINVTFSPGSVPLRQIEKFVTMDHYNRIKEVQSVGDGYLALGCTYYLEGFHILEKNATSCTIRSYIQYEVQDELAPQVEPFIMIESLIGMANAIVGFALRNGGRHDTI
Berberis koreana	S-norcoclaurine synthase 2	NCS	>KorG38815T	MKEQLINEVEVTVAADKLWEFYGTLKLGVTIAELAPEVIEKVEVVEGDGGVGTVLKVVFPEGTPLFTSYKEKFTKLDGEKRLKEAEVIEGGYLNHGFSLYRVTFQIIEKDAESSIIKSTIDYELDDKFAANASLVSTKPLEAISEAMGKYLAKKP
Berberis koreana	S-norcoclaurine synthase 1-like	NCS	>KorG18931T	MEVGLLAEPLQHNVQDLASKKLDVIPSRYIRTELAADIICMDEASVIPVIDVSKLCDDTFSQDELEKFHLACQDWGFFQLVNHEVPKDALEIVKTDLTEFFKLPIEEKMACQQPGQEEGYGLVLMFSDEQKLDWGDMIYIITQPETKRNVKVWPNSPLTFRETIVQYSLELQKIKKCILSLMAKNLGIEPEKFTDMFEGGMQSMRINYYPPCREDDKVLGISPHSDATGITFLIQVNDVQGLQIKHKGCWVPVVLSTDAILVNIGDVIEILTNGRYKSIEHRVVINKNKERISVAAFHELNEKETIEPLQELIKEGEDKCYRSLSSAEYRKLELSQHLDGKTLIEKMKLKK
Berberis koreana	S-norcoclaurine synthase 1-like	NCS	>KorG18934T	MEVGLLAEPLQHNVQDLASKKLDVIPSRYIRTELAADIICMDEASVIPVIDVSKLCDDTFSQDELEKFHLACQDWGFFQLVNHEVPKDALEIVKTDLTEFFKLPIEEKMACQQPGQEEGYGLVLMFSDEQKLDWGDMIYIITQPETKRNVKVWPNSPLTFRYVNIFSVRYNCLFSIRIMIKLCG
Berberis koreana	S-norcoclaurine synthase 1-like	NCS	>KorG18943T	MELDEIRSYGASLPVENVQALAAKDLKEIPERYIRPELEFDVVVSIENSGEIPVIDLSRLLDEHFAHDELAKLHSACEEWGFFQLTNHGASEEVIEKMKTDTQEFFRLPLEEKKAYAQVSNGIEGYGQAFVFSEEQKLDWGDMLFLFALPINQRNFKFWPTNPTSFRETTEKYSLEVHKVAICLLGLIAKNLGIEPEKFTEVFEDGMQHFRLNYYAPCPHAHKVLGLSPHSDGSALTLLTQVNDDVDGLQIKKNGNWMPVKPISGAFIVNIGDVIEITSNGKYKSIEHRAIIDPKKERLSIAAFHNQNFRTTIGPFPELLKGNITEKYKTVSYQDYLRNITSTGLDGKNRLEFMKL
Berberis koreana	S-norcoclaurine synthase 1-like	NCS	>KorG09460T	MKDAKVFSGSLPVENVQALAAKGSEQVPDRYIRPELDSDVVCVDQSRGIPVIDLSKLLGEQFSGDEMAKLHSACLDWGFFQLISHGASEEGIEKMKIDMQEFFSLQLEEKKIYSTLPNPNSNEGYGQSFVVSEEQKLDWADMLFLVSLPVHGRNMKFWPETPTSFRGTLDKYALELQKIAICLIGLMGKNLGVEPEKFTRMFENGSQGVRMNYYPPCPQADKVVGLSPHSDGSVLTLLIQVNDVEGLQIRKNGNWVPVKPIRNAVIVNIGDALEIISNGKYKSIEHRGVVDPKKERLSIAAFHSPNFDTMIGPLPDLVKGNTEHYKTISYEEYIKLILSIKLDGKSRLDILKLD
Berberis koreana	S-norcoclaurine synthase 1-like	NCS	>KorG09464T	MENPEGLLPTPVPVVQIVQDLATKNLDVIPSRYIRSERVADVVSSIDEKLMVPVIDFSKLSDDKLSRDEMEKFHLACQDWGFFQLINHGLPKDVLLNMKTDVTQFFKLTSEEKKACQEPGEVEGYGVQHFVYSDEQELDWGDVLFLVTQPEDAISMKHWPTCPATFRETVSIYSIELEKIKVCVLGLMAKNLGIEPAEKLTNMFDEGMQSMRINYYPPCLEDDKVMGSSPHSDATGITFLIQVNDVQGLQIRHNGCWVPVVISTDAILVNIGDLLEILTNGKYKSIEHRVVINKNKERLSIAAFHDLNENETIGPLPELIKEGEDKCYKSLSCDEYRMLEAGQKL
Berberis koreana	S-norcoclaurine synthase 1-like	NCS	>KorG09466T	METGLVAPIPLSVQNVQDLSTKNLDVIPSRYIRPELANDIISIDEGSMIPIIDLSKLTDEQFCQDELEKFHLACKDWGFFQLINHGVQQDALENVKREVTEFFKQPFEVKKEFSQQPGEVEGYGQAYVFSDEQKLDWGDMLYLITQPDVARNMKLWPTSPPTFRETIVKYSEELQKVKMCVMASMAKNLEIETEKFTNMFEKGIQSMRFNYYPPCVEDDKVLGISPHSDATGITFLIQVNHVHGLQLRHKGNWVPVVLTTDAILVNIGDVLEILSNGKYKSIEHRVVINKTKERLSVAAFHEVNDNVMIGPLPELIKQGEDKYYKSLSFVDYTKLLNSEKLDGKTLIEQMKLKN
Berberis koreana	(RS)-norcoclaurine 6-O-methyltransferase-like	6OMT	>KorG37099T	MEEDIKAQALLWKYIYGFADSFVLKCAIQLGIADILHEHGQPMTLSELATSLPHPSINEDRLYRFMRYLVHMKLLGKVELDGLIKYSLTPESKLVIKNQEKSLASFALLLSYEMDAWHHLSASVEGGDVTPFERCKGMGYREYFAKNSAANQLLSDAMTSHTSMVTDAVVKGFEKDHVLDGMTSLIDVGGSTGVAARAIAKAFPEVKCAVFDLPHVIATAPECPEVTRIEGDVFVSLPKTDLVFMKSVLHDWGDEDCVKILNKCKEAIADSKQGKIVLVEIVMDAVSTDDEFKSAKLGMEMDMLVTVAGKERSEQEWQSLFKAAGYSRYHITPIVAIESIIQVFP
Berberis koreana	(RS)-norcoclaurine 6-O-methyltransferase-like	6OMT	>KorG42234T	MDITQEEISAQAQVWKHMYGFAETIMIRCVLDLGIADILHAHGPMTLTQLANALPKDSINIDRFHHVMRYLVHMKLFKITKDEHTMEDKYTLTPASKLLVKDNKKCLAPYVMLQTHPEEFSIWAHLMEYLNGKKPYWESTYGVSLYGQIETDQSKYNNMVNDAMNSHTMFVIPAVVGGLMKSKILDDVKSLVDVGGSTGAAAKGIADGFPHVKCFVMDLAHVIESVPKDGGLNFVAGDMFSFIPKADAIFLKSVLHNYDDDVCLKILAKCKEAIPLTKGKVILVEIVVDVETLPEFSSARCCMDMEMMLMGGKERTKQEWVDLLDKAGFSHHEIIPVMA
Berberis koreana	(RS)-norcoclaurine 6-O-methyltransferase	6OMT	>KorG11252T	MEEENIANQAKLWSIIYGFSDSLVLRCAVELDIANIIHNHGKSMTLSELASVLPVKQPINSDSLYRVMRYLAHLKVFTKTLDADGETRYGLAPPAKFLVKGNDNCMVGSLMGLTDKDFMAPWQYIKDSLSGDDGKTAFEKALGMDIWEYMGENPEKNKLFNEAMACDTRLVLSALINECKDKFQGINSLVDVGGGTGTAARNLVKAFPHLKCTVYDLPHVIADSPVYPEITQVPGDMFKVIPYADAILMKCILHDWGDKECIEILKKCKEALPKEGGKVIIVDIVLDVKSEHPYTKLRLTLDVDMMLNTGGGKERTEEEWKKLIQDAGFKSYNITQISALQSVIEAFPY
Berberis koreana	RS-norcoclaurine 6-O-methyltransferase-like protein	6OMT	>KorG16153T	MRYLLHMKIFKIVDKDKYALTRASELLVKSHEKSLAPFTMLQTRPQEFTVWGHFIENLDKAKNYTEVYHEMDNDPEINKLVNEAMTSHTMCMVPALVSGLTKENVLADVASLMDVGGSEGIASKAVIQVVSHIVKCIIMDLAHVIDTVPNDPRLDFLAGDMFDFVPKADAVLLKSILHNYDDENCLKILTKCKEAIPTKGGKVVIVEIVIDTQNLPEFSSARLGLDMEMICMGGQERTKQEWATLLHKAGFDHHTIIPIRAIESIIVACP
Berberis koreana	RS-norcoclaurine 6-O-methyltransferase-like protein	6OMT	>KorG16155T	MRYLLHMKIFKIVDKDKYALTRASELLVKSHEKSLAPFTMLQTRPQEFTVWGHFIENLDKAKNYTEVYHEMDNDPEINKLVNEAMTSHTMCMVPALVSGLTKENVLADVASLMDVGGSEDWISWLVTFDFVPKADAVLLKSILHNYDDENCLKILTKCKEAIPTKGGKVVIVEIVIDTQNLPEFSSARLGLDMEMICMGGQERTKQEWATLLHKAGFDHHTIIPIRAIESIIVACP
Berberis koreana	RS-norcoclaurine 6-O-methyltransferase-like protein	6OMT	>KorG37099T	MEEDIKAQALLWKYIYGFADSFVLKCAIQLGIADILHEHGQPMTLSELATSLPHPSINEDRLYRFMRYLVHMKLLGKVELDGLIKYSLTPESKLVIKNQEKSLASFALLLSYEMDAWHHLSASVEGGDVTPFERCKGMGYREYFAKNSAANQLLSDAMTSHTSMVTDAVVKGFEKDHVLDGMTSLIDVGGSTGVAARAIAKAFPEVKCAVFDLPHVIATAPECPEVTRIEGDVFVSLPKTDLVFMKSVLHDWGDEDCVKILNKCKEAIADSKQGKIVLVEIVMDAVSTDDEFKSAKLGMEMDMLVTVAGKERSEQEWQSLFKAAGYSRYHITPIVAIESIIQVFP
Berberis koreana	RS-norcoclaurine 6-O-methyltransferase-like protein	6OMT	>KorG42234T	MDITQEEISAQAQVWKHMYGFAETIMIRCVLDLGIADILHAHGPMTLTQLANALPKDSINIDRFHHVMRYLVHMKLFKITKDEHTMEDKYTLTPASKLLVKDNKKCLAPYVMLQTHPEEFSIWAHLMEYLNGKKPYWESTYGVSLYGQIETDQSKYNNMVNDAMNSHTMFVIPAVVGGLMKSKILDDVKSLVDVGGSTGAAAKGIADGFPHVKCFVMDLAHVIESVPKDGGLNFVAGDMFSFIPKADAIFLKSVLHNYDDDVCLKILAKCKEAIPLTKGKVILVEIVVDVETLPEFSSARCCMDMEMMLMGGKERTKQEWVDLLDKAGFSHHEIIPVMA
Berberis koreana	(S)-coclaurine N-methyltransferase	CNMT	>KorG31179T	MAAVEAETNYNNTTTTCDDTKQQEQHKMMNKDELLKKLENGSIPDHEIKQLIGAQLERRLRWGYKPTYEQQLAQLLDLAHSLRKMKIADEVETLDSQMYEVPISFLRIMNGARLKGSCSYFKDDSTTLDEAEIAMLDLYCERAQIQDGQSVLDLGCGQGAFTLHVAQKYKNCRVTAITNSVSQK
Berberis koreana	(S)-coclaurine N-methyltransferase-like	CNMT	>KorG45934T	MTAALTEVTYNTSVRVVLGLLERNFVPDRVIRRLTRLLLATRLRNIQHLQLSDLLTFLHSLQDMPIAIKTDEPKSQHYELPTSFFELVLGKNMKYSCCYFLQKSDTLEDAEKAMLELYCERAQIKDGQTVLDVGCGWGSLCIFIAQKFYNCKITGICNSTTQKAYIEEKCRNLQLQNVEIIVADISTFEMDASFDRIVSIEMFEHMKNYKELLKKISKWMEQDSLLFVHHFCHKAFAYHFEDTNEDDWITRYFFSGGTMPSANLLLYFQEDVSVVDHWLVNGTHYAITRCSC
Berberis koreana	(S)-coclaurine N-methyltransferase-like	CNMT	>KorG45937T	MSCCYFLQKSDTLEDAEKAMLELYCERAQIKDGQTVLDVGCGWGSLCIFIAQKFYNCKITGICNSTTQKAYIEEKCRNLQLQNVEIIVADISTFEMDASFDRIVSIEMFEHMKNYKELLKKISKWMEQDSLLFVHHFCHKAFAYHFEDTNEDDWITRYFFSGGTMPSANLLLYFQEDVSVVDHWLVNGTHYAITSEKWLKRMDQNIVSIKPIMESTYGKDSAVKWTAYWRTFFISVAELFGYNNGEEWMVTHYLFKKK
Berberis koreana	(S)-N-methylcoclaurine 3'-hydroxylase	NMCH/CYP80B	>KorG09433T	MDLITCLVVLSLFFFLYLFITDHLSRKGLPPGPRPWPIIGNLLQLGEKPHSEFAKLAQTYGEIFTLKLGTQTVVVASSPAAATEILKTHDRILSGRYVFQSFRVMEHVENSIVWCQCNDNWKMLRKVCRTELFTPKMIESQAHVRESKALEMVRFLRSKQGQVVKIAEVVFGTLVNIFGNLIFSKDVFELGDPTSGSAEMKEHLWRMLELGNSTNPADYFPFMGRFDLFGQRRDVAECLRQIYKIWGVILEERRRSGSKQNNDFVDVLLNAGIDDKKINALLMELFGAGTETSASTIEWAIAELTKNPHVTKKLRNELLNVVGKATVKESDIPRLPYLQAFVKEVLRLHPPTPLLLPRRALETCQVMNYTIPKECQIMVNAWAIGRDPKTWTDPLTFLP…
Berberis koreana	(S)-N-methylcoclaurine 3'-hydroxylase	NMCH/CYP80B	>KorG09434T	MDLITLVVLSLFFFLYLFITDHLSRKGLPPGPRPWPIIGNLLQLGEKPHSEFAKLAQTYGEIFTLKLGTQTVVVASSPAAATEILKTHDRILSGRYVFQSFRVMEHVENSIVWCQCNDNWKMLRKVCRTELFTPKMIESQAHVRESKALEMVRFLRSKQGQVVKIAEVVFGTLVNIFGNLIFSKDVFELGDPTSGSAEMKEHLWRMLELGNSTNPADYFPFMGRFDLFGQRRDVAECLRQIYKIWGVILEERRRSGSKQNNDFVDVLLNAGIDDKKINALLMVNIFFFFHFFSCFSCFYVAVLCGLNKFEVHVGLLFRHFSCFISIIPHFSRFTYIIPTLFTLGFLRFYSMIWFQFCCLEMCVLSCVNKKTNGILNLMI
Berberis koreana	(S)-N-methylcoclaurine 3'-hydroxylase isozyme 2	NMCH/CYP80B	>KorG20960T	MMKIMEEANAKSNLFFLLLALPPLVYFILKYIKSPTLPPGPFSWPIIGNLFSIGNKPHASLAQLSNAHGPIISVCLGTRLVVVGSSPSVAMEILKIHDLVMSARYIPNASYVKKLTHTKFSLGWADCTDQWKYLRTICRTELFSNTAIESQSKLREIKVIELVEYLGTQYGQLVKIDEVVFDTVINMLSNTLVSQDFVNMKKRDSEEGSRGLVRRFFWLISPNLADLYPILEIFGIKGLNKKSKELFF
Berberis koreana	(S)-N-methylcoclaurine 3'-hydroxylase isozyme 2	NMCH/CYP80B	>KorG37380T	MEEVLGDSNLFFLLLLALLPFFFFILNYIKSPTLPPGPFSWPIIGNLLKMGTKPHVSLAQLAHTYGPIISLRLGTRLLVVGSSPSAAIEILKTHDRLLSARTIPDASPTKDPAHTKFSLAWADCTDQWKYLRTICRSELFSIKAIESQSKMREEKVIELVKFLGTKDGQLVRIDEVVFDTMVNMLSNIFVSQDFVNMEERDSEEGLRGLVRKFVEVALTPNIADFYPILSVLDLHGLKKRSKELFVKICDLWGVMIKERREGKTGNKDFLDFLLANGFINHQINCLLLELFGAGTDTTTTTIEWAMAELMKNEEAMKNVLSELEREIHTNMVKESDLPQLPYLHACVKETLRLHPPAPLLLPHRALETCKVMNYTIPKDTQVLVNVWAIGRDPMVWNDP…
Berberis koreana	(S)-N-methylcoclaurine 3'-hydroxylase isozyme 2	NMCH/CYP80B	>KorG37383T	MEEAFGESNLFFIILLALVPVPLVYFIFNYINSPTLPPGPFPWPIIGNLLKIGDKPHASLAHLAHTHGPIISLRLGTRFVVVGSSPAVAAQILKAHDRILSARSMPSASPAKYKPQHTIAWTDCTDQWKYLRTICRSELFSNTAIESQSKLREEKVIELVKFLGTKYGQVVRIDEVVFDTVINMLSSTLMSQDFVDMEKRDSEEGLRVLVRNYIELAVTPNLIDLYPILDILDLKGVKKKSKELFVKICGLWGGIIKERRQSKSSDQRDFLDFLLANQFSDDGINYLLLELFTAGSDTTTSTIEWAMAELMKNEEAMKNVLSELEREIHTNMVKESDLPQLPYLHACVKETLRLHPPAPLLLPHRALETCKVMNYTIPKDTQVLVNVWAIGRDPMVWND…
Berberis koreana	3'-hydroxy-N-methyl-(S)-coclaurine 4'-O-methyltransferase	4OMT	>KorG39196T	MELNGKDESVDIKAQAHLWKIIYGFADSLVLRCAVELGIADIINDNNQPITLPDLAAKLPVSNVNFDHLYRILRYLAHMKLIKQEEKRGVTLYSLEPIGTMLVKNAKRNMVPIILGMTQKDFMTSWHFMKDGLSNDGTTAFEKGMGMTIWEYLEGHPEQSQLFNEGMAGETRLLTSSLINGCRDLFKGINSLVDVGGGNGTTIKAISDAFPHIKCTLYDLPHVVANSYDLPNVERIPGDMFQSVPSAQAILLKLILHDWSDEDCIKILKKCKEAVPKEGGKVIIVDVALDETSDHELTGTRLILDIDMLVNTGGKERSKEDWDKLVKAAGFKGFNIRHIAAVQSVIEVFP
Berberis koreana	Berberine bridge enzyme	BBE	>KorG25014T	MQNQIFTRPKYPRPSMIILPQSKEELAASVVCSKRGLWTIRLRSGGHSYEGLSYVADTPFVVIDLMNLNRISIDLESKTAWVESGATLGEIYCAISEASDTLGFSGGYCPTVGSGGHISGGGFGMMSKKIWTCS
Berberis koreana	Berberine bridge enzyme-like 15	BBE	>KorG41850T	MEAIVVAIMCFLLSVSASTSLRNSDIVKENLIQCFSLHPPSSVPISHIIYSPNNSSYPFLLQYYARNLMFLSPAILKPLLIITPLLDSHVQATVICCRKHGLQLRIRSGGHDYEGLSYISHVPSFVILDLFNLRSISVDVQDNSAWVQAGATVGEVYYRIAEKSNTHGFPAGLCPTVGVGGHISGGGFGTMLRKFGLASDNILDAYIVDVRGRILDRQIMGDDLFWAIRGGGGASFGVILSWKIKLVLVPSTVTVFTFAKTLEQGATKLVNKWQHIGHKLPKDLFIRIIIETVTKGEDEGSDYYATTIQTTFNSLFLGRADQLHAIMEDSFPELGLQREDFIEKSWIESVMYFSYYPEGSTIDALINRTPQAKTFFKGKTDYVKEPLSESRPERLWKKC…
Berberis koreana	Berberine bridge enzyme-like 13	BBE	>KorG32287T	MAKPITPIVFILSLFSSHLLLLVSANNETFHQCFSSLSTLSANKRTNISDLLYTPKSTSFTSILQSSIQNLRFNSSTIPKPVFIVTPSKDSHVQVAVVCARKHGLNIRVRSGGHDYEGLSYMSTIATPFVIIDLVNLRKVNVKVKDSTAWVQAGALLGELYYGIGKKSKTLAFPAGVCVTIGVGGHFSGGGQGTLLRKYGLAGDNVIDVRMVDARGRILDRITMGEDAFWAIRGGGGSSFGVILSWKIKLVDVPPTVTVFNVGRTLEQGAAKLIHTWQQIAPKFDDDLFIRIIITPSKNKTGGRTVQAVFNSLFLGTMEELIPLMKKSFPELGMALKDCREMSWVESTLFFNDGYPKTETIDALANRSHVTKAFFKAKSDYVKQPIPENDLNHILKSFF…
Berberis koreana	Berberine bridge enzyme-like 15	BBE	>KorG32286T	ILSLFSSHLLLLVSANNETFHQCFSSLSTLSANKRTNISDLLYTPKSTSFTSILQSSIQNLRFNSSTIPKPVFIVTPSKDSHVQVAVVCARKHGLNIRVRSGGHDYEGLSYMSTIATPFVIIDLVNLRKVNVKVKDSTAWVQAGALLGELYYGIGKKSKTLAFPAGVCVTIGVGGHFSGGGQGTLVRKYGLAGDNVVDVRMVDARGRILDRITMGEDAFWAIRGGGGSSFGVILSWKIKLVDVPPTVTVFNVGRTLEQGATKLIHIWQQIAPKFDDDLFIRIIITPSTNEKGGRTVQATFNSLFLGTKEELIPIMNKSFPELGVVAKDYREMSWVESTLFFDGYPETETIDALADRNHSTKGFFKAKSDYVKQPIPENDLNHILKSFFIEDRPSVMLFD…
Berberis koreana	Berberine bridge enzyme-like 13	BBE	>KorG32287T	MAKPITPIVFILSLFSSHLLLLVSANNETFHQCFSSLSTLSANKRTNISDLLYTPKSTSFTSILQSSIQNLRFNSSTIPKPVFIVTPSKDSHVQVAVVCARKHGLNIRVRSGGHDYEGLSYMSTIATPFVIIDLVNLRKVNVKVKDSTAWVQAGALLGELYYGIGKKSKTLAFPAGVCVTIGVGGHFSGGGQGTLLRKYGLAGDNVIDVRMVDARGRILDRITMGEDAFWAIRGGGGSSFGVILSWKIKLVDVPPTVTVFNVGRTLEQGAAKLIHTWQQIAPKFDDDLFIRIIITPSKNKTGGRTVQAVFNSLFLGTMEELIPLMKKSFPELGMALKDCREMSWVESTLFFNDGYPKTETIDALANRSHVTKAFFKAKSDYVKQPIPENDLNHILKSFF…
Berberis koreana	Scoulerine 9’ O methyltransferase	SOMT	>KorG04968T	HTINQSQTTLTMAYTHNGLATQESPSYLSGLGLSRLICLPMALRAAIELNVFEIISQAGPKAQLSSSQILTKIPTKNPNGAIALERILRLLGASSILSVSTNSSNQRVYGLTSESRTLVPRADQVSVVPMLLFTADKAVVESFYMLKDVVLDEPGCIPFDKTHGMNFFEYAGKEPRVNKVFNQAMAVGSTIAFDEVFKVYNKGFDGMKELVDVGGGIGTSLSSIVAKYPHIRGINFELDHVIADAPTYPGVEHIAGNMFEGVPSAQNIMLKWVLHDWGDEQGLIILKNCWKALPENGKVIVIEFVLPEVLGNNAESFNALTPDLLMMALNPGGKERTIAEFSGLAKEAGFEEVKPFPISQGLHVIEFHKTKACA
Berberis koreana	(S)-canadine synthase	CYP719A1	>KorG07325T	MEFTVWVVGFNVLVVVAMTMFLLRTKSSSSTTKWPIGPKKLPIIGNLHQLGGDVLHVALAKLAKVHGGIMTIWIGSWRPVIVVSDIDKAWEVLVNKSSDYSARDMPEITKIASASWHTISSSDSGPFWQNLRKGLQNGALGPANISAQSQLQERDIKRMIGELQKEAKINGGIVKPLDHIKKATVRLLSRLIFGHMFDDDSFIESMHHEIEDLIRISGYARLAEAFSYAKYLPSHKLAVKEAYEVKHRVEQLVRPLLTSSPPANSYLNFLLSQDYSEEVIIFCIFEIYLLGVDSTSSTTTWALSFLIHEQQVQEKLYQSIKGVTSDDDGLVKAEDLSKLQYLQAVMKETMRIKPIAPLAIPHKASKDTKLMGTKVAKGTRVMVNLYALHTKENIWSDPE…
Berberis koreana	(S)-canadine synthase	CYP719A1	>KorG45990T	MEVTLSLWPALITIFTLLLTISILCRTKLSSSSSTTEWPIGPKTLPIIGNLHQLGAEVQHVALSKLAKLHGGVMTIWIGSWRPVIVVSNIAEAWEVLVNKSLDYAARGPPEVTKLSTAGWRTVSTSDPGLYWHNLRKGLQNGPLSPINVSAQMHFQERDIEHMINDMQEEAKVNGGIVKPLDHLKRAAVRLLSRLIFGQTFDDKLFIESMHHEIDELIRMSGYFHLSEAFSYAKYLPSHRRAVKQLRQINLAIKELVQPFLASSPPSNSYLNFLLSQDYPHDVVVACITELYVLGVDSTSATTTWALAFLIHDQTAQENLYQNIKQNTVNGYSTILKTEDFSKMHYLQAVMKETMRMKPIAPFAIPHKSSKDTTLMGRKVAKGTRVMVSIYALHHNPNA…
Berberis koreana	(S)-tetrahydroberprotoberberine oxidase	STOX	>KorG27536T	MEHKQMSKMASSIFTTFSLLSLLLPTSLASSDANYEDFLQCLDLYSQNSIPVYTRNTSSYTSILESTIYNLIFLSPTTPKPYFIVTPMQESHVQTSVICCRKHGLQMRIRSGGHDFEGLSYVSNVPFVVLDLIHFRTIKVDIEDNSAWVQTGATIGELYYRIAEKSRVHAFPAGLCPTVGVGGHISGAGYGVLIRKYGVSADHVIDARIVNADGEILDRESMGEDLFWAIRGGGGASFGVILAWKIRLVPVPPTVSIFIVPKTLEEGATALLHKWQFIGDNVHEDLYTGISMRREIISPKGNKTILVSFIGLFLGGSDKLVQHMGQSFPELGVKPRDCVEMSWIKSAVVFGVFSNDALLNVLLDRKNPFPPKSYYKIKSDYVTEPLPITVLEGILKRFL…
Macleaya cordata	Pyridoxal phosphate-dependent decarboxylase	TYDC	>OVA11797.1	MGSLHADVLENNTAFGMNPLDPEEFRKQGHMIIDFLADYYRDIEKYPVRSQVEPGYLRKRLPESAPYNPEPIETILQDVQNEIVPGITHWQSPNYFAYFPSSGSIAGFLGEMLSTGFNVVGFNWMSSPAATELESIVMDWLGKMLKLPKPFLFSGNGGGVLQGTTCEAILCTLTAARDRMLNRIGRENIGKLVVYGSDQTHCALQKAAQIAGIFPKNFRAVQTFKAHAFGLSADTLKKVVLADVEAGLIPLFVCPTVGTTSSTAVDPIGPICEVAKEFGMWVHVDAAYAGSACICPEFRHFIDGVENADSFSLNAHKWFFTTLDCCCLWVKDPSALVKALSTNPEYLKNKATESKQVVDYKDWQIALSRRFRSMKLWMVLRSYGVTNLRNFLRSHVKMA…
Macleaya cordata	Pyridoxal phosphate-dependent decarboxylase	TYDC	>OUZ99264.1	MGSLHADNLESISVCSQNPLDPDEFRRQGHMIIDFLADYYRDVENYPVRSQVEPGYLSKRLPESAPYNSESIETILQDVQKDIIPGLTHWQSPNYFAYFPSSGSIAGFLGEMLSTGFNVVGFNWMSSPAATELESIVMNWLGKMLKLPESFLFSSDGNGSSGGGVLQGTTCEAILCTLTAARDQMLNKIGRENIGKLVVYASDQTHCALQKAAQIAGINPKNFRAIATSKATEFGLSPNSLLSTILEDLDSGLIPLFLCATVGTTSSTAVDPIGPLCEVAKRYGIWVHVDAAYAGSACICPEFRHFIDGVEDADSFSLNAHKWFFTTLDCCCLWVKDPNALVKALSTNPEYLKNKATESKQVIDYKDWQIALSRRFRSMKLWLVLRSYGVANLRNFLRS…
Macleaya cordata	Pyridoxal phosphate-dependent decarboxylase	TYDC	>OUZ99267.1	MGSLHADNLESISVCSQNPLDPDEFRRQGHMIIDFLADYYRDVENYPVRSQVEPGYLHKRLPESAPYNSESIETILQDVQKDIIPGLTHWQSPNYFAYFPSSGSIAGFLGEMLSTGFNVVGFNWMSSPAATELESIVMNWLGKMLKLPESFLFSSDGSGSSGGGVLQGTTCEAILCTLTAARDQMLNKIGRENIGKLVVYASDQTHCALQKAAQIAGINPKNFRAIPTSKATEFGLSPNSLLSTILADIESGLIPLFLCATVGTTSSTAVDPIGPLCEVAKRYGIWVHVDAAYAGSACICPEFRHFIDGVEDADSFSLNAHKWFFTTLDCCCLWVKDPNALVKALSTNPEYLKNKATESKQVIDYKDWQIALSRRFRSMKLWLVLRSYGVANLRTFLRS…
Macleaya cordata	Pyridoxal phosphate-dependent decarboxylase	TYDC	>OUZ99268.1	MGSLHADNLESISVCAQNPLDPDEFRRQGHMIIDFLADYYRDVENHPVRSQMEPGYLRKRLPESAPYNSESIETILQDVQKDIIPGLTHWQSPNYFAYFPSSGSIAGFLGEMLSTGFNVVGFNWMSSPAATELESIVMNWLGKMLKLPESFLFSSDGSGSSGGGVLQGTTCEAILCTLTAARDQMLNKIGRENICKLVVYASDQTHCALQKAAQIAGINPKNIRAITTSKATEFGLSPNSLLLTILADLESGLIPLFLCATVGTTSSTAVDPIGPLCEVAKRYHIWVHVDAAYAGSACICPEFRHFINGVEDADSFSLNAHKWFFTTLDCCCLWVKDPNALVKALSTNPEYLKNKATESKQVIDYKDWQIALSRRFRSMKLWLVLRSYGVANLRNFLRS…
Macleaya cordata	Pyridoxal phosphate-dependent decarboxylase	TYDC	>OVA11563.1	MGSLHADNLESISVCSQNPLDPDEFRRQGHMIIDFLADYYRDVEKYPVRSQVEPGYLRKRLPESAPYNSEPIETILQDVQKDIIPGLTHWQSPNYFAYFPSSGSIAGFLGEMLSTGFNVVGFNWLSSPAATELESIVMNWLGKMLKLPESFLFSSDGSGSSGGGVLQGTTCEAILCTLTAARDQMLNKIGRENIGKLVVYASDQTHCALQKAAQIAGINPKNFRAIATSKTTEFGLSPNSLLSTILADIESGLIPLFLCATVGTTSSTAVDPIVPLCEVAKRYGIWVHVDAAYAGSACICPEFRHFIDGVEDADSFSLNAHKWFFTTLDCCCLWVKDPNALVKALSTNPEYLKNKATESKQVIDYKDWQIALSRRFRSMKLWLVLRSYGVANLRSFLRS…
Macleaya cordata	Pyridoxal phosphate-dependent decarboxylase	TYDC	>OVA11561.1	MFSKSEFRRQGHMIIDFLDDYYRDVENYPVRSQVEPGYLSKRLPESAPYNSESIETILQDVQKDIIPGLTHWQSPNYFAYFPSSGSIAGFLGEMLSTGFNVVGFNWMSSPAATELESIVMNWLGKMLKLPASFLFSSDGSGSSGGGVLQGTTCEAILCTLTAARDQMLNKIGRENIGKLVVYASDQTHCALQKAAQIAGINPKNFRAIATSKVTEFGLSPNSLLSTILADLELGLIPLFLCATVGTTSSTAVDPIGPLCEVTKRYGIWVHVDAAYAGSACICPEFRHFIDGVEDADSFSLNAHKWFFTTLDCCCLWVKDPNALVKALSTNPEYLKNKATESKQVIDYKDWQIALSRRFRSMKLWLVLRSYGVANLRSFLRSHVKMAKQFEGLIANDKRF…
Macleaya cordata	Pyridoxal phosphate-dependent decarboxylase	TYDC	>OVA04137.1	MGSGHDVNLIDNISMCSHDLLDPEEFRRQGYMMIDFIADYYRDIEKYPVRSQVEPGYLSKRLPESAPYNSEPIETILQDVQNEIIPGLSHWQSPTHFAYFPCTISTAGFLGEMLSTGFNVVGFSWVSSPAATELESIVMNWLGKMLELPKCFLFSSDKNINEGSGGGVLQGTTCEAILCTLTAARDQMLNKIGRENIGKLVVYASDQTHCALQKAAQIAGINPKNIRAITTSKATEFGLSPNSLLLTILADLESGLIPLFLCATVGTTPSTAVDPIGPLCEVAKRYDIWVHVDAAYAGSACICPEFRHFINGVEDADSFSLNAHKWFFTTLDCCCLWVKDPNALVKALSTNPEYLKNKATESKQVIDYKDWQIALSRRFRSMKLWLVLRSYGVANLRNF…
Macleaya cordata	Pyridoxal phosphate-dependent decarboxylase	TYDC	>OVA11562.1	MGSLHADNLESISVCSQNPLQPDEFRRQGHMIIDFLADYYRDVEKYPVRSQVEPGYLRKRLPESAPYNSEPIETILQDVQKDIIPGLTHWQSPNYFAYFPSSGSIAGFLGEMLSTGFNVVGFNWMSSPAATELESIVMNWLGKMLKLPESFLFSSDGSGSSGGGVLQGTTCEAILCTLTAARDQMLNKIGRENIGKLVVYASDQTHCALQKAAQIAGINPKNFRAIATSKATNFGLSPNSLLSTILADIESGIWVHVDATYAGSACICPEFRHFIDGVEDADSFSLNAHKWFLTTLDCCCLWVKDPTALVKALPTNPEYLKNKATESKQVIDYKDWQIALSRRFRSMKLWLVLRSYGVANLRNFLRSHVKMAKQFEGLIAKDKRFEIVVPRTFAMVCFR…
Macleaya cordata	Pyridoxal phosphate-dependent decarboxylase	TYDC	>OVA00184.1	MGSQHTDDNLAENVSLSSMRSHELVDSEEFKRQGYMVIDFIADYYRNIEKYPVRSQADPGYLSERLPESAPNNPEPIEAILQDIQNDIIPGLTHWQSPTHFAYFPSTISTAGFLGEMLTTGFNVVGFSWVSSPAATELESLVMNWLGKMLELPKCFLYSSGGGSGGGVIQGTTCEAILCTVTAARDQMLNKVGRENIGKLVVYGSDQTHCGTQKAAQIAGINPNNCRAIATMKATNFGLSPHSLLSTILKDIESGLIPFFLCATIGTTSTTAVDPIGPLCEVAKKYGIWVHVDAAYAGSACICPEFRHFIDGVEDADSFSLNAHKWFFTNMDCCCLWVKDSSALINALSTNPEYLKNKATESKQVIDFKDWQICLSRRFRALKLWLILRSYGVSNLRSF…
Macleaya cordata	Pyridoxal phosphate-dependent decarboxylase	TYDC	>OVA07975.1	MGSLDDTNFTSDSPILNEFKPLDPEEFRKQAYQTVDFIVDYYKNIEKYPVLSQVEPGYLRNHLPNTAPNEPEPFESILKDVQKEIIPGMTNWLSPNFFAFFPATVSTAAFMGEMLCTSFNSVGFNWLASPAATELEIVVMDWLAAMLKLPKSFMFSGSGGGVIQGTTSEAILCTLVAARDRALERIGEDNIGKLVVYGSDQTHSTFAKACKIAGILSCNVRSLHTTTDTYFSLSPTFVRATIEADVAAGFVPIYLCLTVGTTSSNAVDPIDQFADMASSHGIWLHVDAAYAGSACICPEFRHYLDGVERADSLSLSPHKWFLTYLDCCCLWVKNPSLLVRALSTNPEYLKNKPSESNSVVDYKDWQVGTGRKFRSLRLWLVLRSYGVVNLQSHIRSDVQ…
Macleaya cordata	Pyridoxal phosphate-dependent decarboxylase	TYDC	>OVA07976.1	MGSLDNTNFSDSPILNEFKPLDPEEFRKQAYQTVDFIVDYYKNIEKYPVLSQVEPGYLRNHLPNTAPNKPEPFEAILKDVQEEIIPGMTNWLSPNFFAFFPATVSTAAFMGEMLCTSFNSVGFNWLASPAATELEMVVMDWLAAMLKLPKSFMFSGSGGGVIQGTTSEAILCTLVAARDRALERIGEDNVGKLVVYGSDQTHSTYVKACKIAGILPGNIRSLPTKTDTDFALSPTLVRTAIEVDVAAGLTPIYICLTVGTTSSNAVDPIDEIADVSSKYGIWLHVDAAYAGSACICPEFRQYLDGVERVDSLSLSPHKWFLTYLDCCCLWVKNPSLLVRALSTNPEYLKNKPSESNSVVDYKDWQVGTGRKFRSLRLWMVLRSYGVANLQSHIRSDIRM…
Macleaya cordata	Pyridoxal phosphate-dependent decarboxylase	TYDC	>OVA11862.1	MLSTGFNIVPFSWVTLPAATELENRVMDWLGKMLQLPNCFLFSSGGGGGSGGGILQGTTCEAILCTLAAARDQMLNKIGRHNICKLVVYGSDQTHSSLKKAAQITGIDPNSFHDIATSKATNFELSPRSLLLTILSDLESGLIPLFLCATVGTTSSTAVDPIGPLCQVAKKYGIWVHVDAAYAGSACICPEFRHFIDGVEDADSFSLNAHKWFFTNMDCCCLWVKDSTGLIKALSTNLEYLKNKATESKQVIDYKDWQIALNRRFRALKLWLIVRSYGVTNLRNFIRSHVKMAKLLEGLIAMDKRFEVVVPRTFAMVCFRLNPETIFNPKLHENGDHSEDQMNELNQKLLESINATGQVYMTHTMIGGIYIMRCPVGTTLTEERHVHSTWKLVQEHVNT…
Macleaya cordata	Tyrosine aminotransferase	TyrAT	>OVA11519.1	MENGGPKRWGFNANNKISSAPGITIRGTLSTIMGSLNPEDERPIIPLGHGDPSAFPCFRTSQIAEDAVVDSLRSAKFNCYSPNVGILPARRAVAEYLSRDLPYKLSPDDVFITIGCSQAIEIALMVLARPGANILLPRPGFFYYEACAKFRNLEYRHFDLLPEKGWEVDLDAIEALADENTVGIVLINPGNPCGNVYTYEHLKKIAETAKKLGILIISDEVYGHLTYGSKPFVPMGVFGSIAPVLTLGSISKRWIVPGWRLGWLVTSDPNGVLKETKVVDSIKGCLNFSGDPVTFIQAAVPQILEKTKEDFFSKIISLLRQSADILYDQIKEINCLTCPHKPEGSMFAMVKFNSSLMEDIDDDMDFCIKLAKEESIIILPGIAVGLKNWLRITFAIEPT…
Macleaya cordata	Tyrosine aminotransferase	TyrAT	>OVA11520.1	MENGGAKKWGFSGNNEINSTSGITIRGVLNTLMESLNPEDERPVIPLGHGDPSVFPCFRTTQIAEDAIVDSLRSAKFNCYSPTVGILPARRAVAEYLSRDLPYKLSPDDIFLTIGCTQAIEIALMALARPGANILFPKPGFPNYEASAGFRKFEYRHFDLLPEKGWEVDLDAVEALADENTVGMVIINPGNPCGNVYTYEHLKKVAETAKKLGILVIADEVYGHLTFGSNPFVPMGVFGSIVPVLTLGSISKRWIVPGWRIGWLVTSDPNGILKETKVVDTIKSCLNISGDPATFIQGAIPQILEKTKEDFFSKIVSILRQSAEILYDQIKEIDCIICPQKPEGSMFAMVKFSSTLMEDINDDMDFCIKLAKEESLIILPGTAVGLRNWLRITFAIEPS…
Macleaya cordata	Tyrosine aminotransferase	TyrAT	>OVA00345.1	MENGGGKKWGLTSRANNKFKMASETSIRGALEILKGSLDAADERPTIPLGHGDPSVFPCFRTTHIVEEALNDAVRSANFNSYSPSAGVLPARRSVAEYLSRDLPYKLSSDDVFVTSGCRQAIEVALSVLAYPGANILIPRPGYPHYEVYAPFINLKVRHFDLLPDKGWEVDLDAVEALADENTIAIVIINPGNPCGSVLTYQHLKKVAETARRLGILVIADEVYGYITFGSNAFVPMGVFGSIVPVLTLGSISKRWILPGWRLGWLAITDPNGLLKETEIVDGIKQFLSFSSNPSSVIQGAVPQILENTKEDFFNKIISVLRQSADICYDELKEIACITCPHKPEGSMFVMVKLNESLMEDIHDDMDFCLKLAKEESVILLPGTVLGLKNWLRITFAID…
Macleaya cordata	Tyrosine aminotransferase	TyrAT	>OVA00346.1	MEKGGTKWVFRGNPKFKSGSQISSISGALQILHGSLNAADERPTIPVGHGDPSVFPCFRTTHIAEDALNHAVQSAKFNSYTPTAGLLPARRSVAEYLSRDLPYKLSPDDVFLTSGCRQAIEVSLSVLAYPGANILIPRPAYPHYETYAPFINLKVRHFDLLPDKGWEVDLDAVEALADENTVAIVIVNPGNPCGNVLTYQHLKKVAETARRLGILVIADEVYGHLTFGNNPFVPMGVFGSIVPVLTLGSISKRWIVPGWRLGWLAITDPNGVVKENKLQQFYVLTVLLMFQGAVPQILENTKEDFFNKIISLLRQTADICYDEIKGIGCITCPHKPEGSMFVMVKLNTSLLEDIYDDMDFCLKLAKEESVIVLPGTVLGLKNWLRITFAIDPSALKDAM…
Macleaya cordata	tyrosine/tyramine 3-hydroxylase/ tyrosine 3 monooxygenase	3OHase	>OVA07976.1	MGSLDNTNFSDSPILNEFKPLDPEEFRKQAYQTVDFIVDYYKNIEKYPVLSQVEPGYLRNHLPNTAPNKPEPFEAILKDVQEEIIPGMTNWLSPNFFAFFPATVSTAAFMGEMLCTSFNSVGFNWLASPAATELEMVVMDWLAAMLKLPKSFMFSGSGGGVIQGTTSEAILCTLVAARDRALERIGEDNVGKLVVYGSDQTHSTYVKACKIAGILPGNIRSLPTKTDTDFALSPTLVRTAIEVDVAAGLTPIYICLTVGTTSSNAVDPIDEIADVSSKYGIWLHVDAAYAGSACICPEFRQYLDGVERVDSLSLSPHKWFLTYLDCCCLWVKNPSLLVRALSTNPEYLKNKPSESNSVVDYKDWQVGTGRKFRSLRLWMVLRSYGVANLQSHIRSDIRM…
Macleaya cordata	tyrosine/tyramine 3-hydroxylase/ tyrosine 3 monooxygenase	3OHase	>OVA07975.1	MGSLDDTNFTSDSPILNEFKPLDPEEFRKQAYQTVDFIVDYYKNIEKYPVLSQVEPGYLRNHLPNTAPNEPEPFESILKDVQKEIIPGMTNWLSPNFFAFFPATVSTAAFMGEMLCTSFNSVGFNWLASPAATELEIVVMDWLAAMLKLPKSFMFSGSGGGVIQGTTSEAILCTLVAARDRALERIGEDNIGKLVVYGSDQTHSTFAKACKIAGILSCNVRSLHTTTDTYFSLSPTFVRATIEADVAAGFVPIYLCLTVGTTSSNAVDPIDQFADMASSHGIWLHVDAAYAGSACICPEFRHYLDGVERADSLSLSPHKWFLTYLDCCCLWVKNPSLLVRALSTNPEYLKNKPSESNSVVDYKDWQVGTGRKFRSLRLWLVLRSYGVVNLQSHIRSDVQ…
Macleaya cordata	tyrosine/tyramine 3-hydroxylase/ tyrosine 3 monooxygenase	3OHase	>OUZ99267.1	MGSLHADNLESISVCSQNPLDPDEFRRQGHMIIDFLADYYRDVENYPVRSQVEPGYLHKRLPESAPYNSESIETILQDVQKDIIPGLTHWQSPNYFAYFPSSGSIAGFLGEMLSTGFNVVGFNWMSSPAATELESIVMNWLGKMLKLPESFLFSSDGSGSSGGGVLQGTTCEAILCTLTAARDQMLNKIGRENIGKLVVYASDQTHCALQKAAQIAGINPKNFRAIPTSKATEFGLSPNSLLSTILADIESGLIPLFLCATVGTTSSTAVDPIGPLCEVAKRYGIWVHVDAAYAGSACICPEFRHFIDGVEDADSFSLNAHKWFFTTLDCCCLWVKDPNALVKALSTNPEYLKNKATESKQVIDYKDWQIALSRRFRSMKLWLVLRSYGVANLRTFLRS…
Macleaya cordata	tyrosine/tyramine 3-hydroxylase/ tyrosine 3 monooxygenase	3OHase	>OUZ99264.1	MGSLHADNLESISVCSQNPLDPDEFRRQGHMIIDFLADYYRDVENYPVRSQVEPGYLSKRLPESAPYNSESIETILQDVQKDIIPGLTHWQSPNYFAYFPSSGSIAGFLGEMLSTGFNVVGFNWMSSPAATELESIVMNWLGKMLKLPESFLFSSDGNGSSGGGVLQGTTCEAILCTLTAARDQMLNKIGRENIGKLVVYASDQTHCALQKAAQIAGINPKNFRAIATSKATEFGLSPNSLLSTILEDLDSGLIPLFLCATVGTTSSTAVDPIGPLCEVAKRYGIWVHVDAAYAGSACICPEFRHFIDGVEDADSFSLNAHKWFFTTLDCCCLWVKDPNALVKALSTNPEYLKNKATESKQVIDYKDWQIALSRRFRSMKLWLVLRSYGVANLRNFLRS…
Macleaya cordata	tyrosine/tyramine 3-hydroxylase/ tyrosine 3 monooxygenase	3OHase	>OVA11561.1	MFSKSEFRRQGHMIIDFLDDYYRDVENYPVRSQVEPGYLSKRLPESAPYNSESIETILQDVQKDIIPGLTHWQSPNYFAYFPSSGSIAGFLGEMLSTGFNVVGFNWMSSPAATELESIVMNWLGKMLKLPASFLFSSDGSGSSGGGVLQGTTCEAILCTLTAARDQMLNKIGRENIGKLVVYASDQTHCALQKAAQIAGINPKNFRAIATSKVTEFGLSPNSLLSTILADLELGLIPLFLCATVGTTSSTAVDPIGPLCEVTKRYGIWVHVDAAYAGSACICPEFRHFIDGVEDADSFSLNAHKWFFTTLDCCCLWVKDPNALVKALSTNPEYLKNKATESKQVIDYKDWQIALSRRFRSMKLWLVLRSYGVANLRSFLRSHVKMAKQFEGLIANDKRF…
Macleaya cordata	tyrosine/tyramine 3-hydroxylase/ tyrosine 3 monooxygenase	3OHase	>OVA11563.1	MGSLHADNLESISVCSQNPLDPDEFRRQGHMIIDFLADYYRDVEKYPVRSQVEPGYLRKRLPESAPYNSEPIETILQDVQKDIIPGLTHWQSPNYFAYFPSSGSIAGFLGEMLSTGFNVVGFNWLSSPAATELESIVMNWLGKMLKLPESFLFSSDGSGSSGGGVLQGTTCEAILCTLTAARDQMLNKIGRENIGKLVVYASDQTHCALQKAAQIAGINPKNFRAIATSKTTEFGLSPNSLLSTILADIESGLIPLFLCATVGTTSSTAVDPIVPLCEVAKRYGIWVHVDAAYAGSACICPEFRHFIDGVEDADSFSLNAHKWFFTTLDCCCLWVKDPNALVKALSTNPEYLKNKATESKQVIDYKDWQIALSRRFRSMKLWLVLRSYGVANLRSFLRS…
Macleaya cordata	Norcoclaurine synthase	NCS	>OVA02898.1	MRYELINEFEVVGASADDVWAVYSSPNLPKLIVELLPGVFERIDVVEGDGHVGTVLHLVYPPGTYVTNILLKLSSVFPFSP
Macleaya cordata	norcoclaurine 6O methyltransferase	6OMT	>OVA16209.1	MEVKKSDQANQAKTWKLIYGFAESQVLKCAVELDIAGTIHNHGQPMTLSELASQLPAQPVNSDRLYRVMRYLVHMKLFTKENVQGEEMRYGLAPSAKYLIKGWEKSIVPSILSLQDKVLMRPWNHLKDAVIGDCTAFEKVFGKNLWVYLADHPDKNKIFNESMACNSRLLTSALVHDCKSVFEGLTSLVDCGGGTGTAAKAIFKAFPHIKCSVYDLPHVIADSPSDPDIVRIAGDMFKFIPSADAILLKWILHDWDDNECIQILKLCKEVVPREGGKVIIVDIVLNVNSKHPFSKMRLRFDLGMMLRTGGKERTEEEWKKLIHAAGFTSYKITHISAIQSCILHDWNDDECIQILKKCKEALPREGGKVIIVDVVLDMDMSHPYSKIRFTLDLDMMLNT…
Macleaya cordata	Coclaurine N methyltransferase	CNMT	>OVA06151.1	MDALIQVPYNATVRVMLSSLERNLLPDVVIRKLTKMLLASRLRLGYKPSSELQLSDLLQFAHSLEEMPIAIKTDKPKTQHYEFPTSFFKFVLGKYMKYSCCYFSDKSKTLEDAEQAMLELYCERAQIKDGHTILDIGCGWGSFSLYIAQKYSTCKITGICNSATQKAHIEEQCRDLQLQNVEIIVADISTFEMEASYDRIVSIEMFEHMKNYKELLKKISNWMKQDSFLFVYHFCHKAFAYHFEDTNEDDWITRYFFTGGTMPSANLLLYF
Macleaya cordata	Coclaurine N methyltransferase	CNMT	>OVA04498.1	MDALIQVPYNATVRVMLSSLERNLLPDVVIRKLTKMLLASRLRLGYKPSSELQLSDLLQFAHSLEEMPIAIKTDKPKTQHYELPTSFFKFVLGKYMKYSCCYFSDKSKTLEDAEQAMLKLYCERAQIKDGHTVLDIGCGWGSFSLYIAQKYSNCKITGICNSATQKAHIEEQCRSTINEVLKSKDSNDNLVIDGSVGPAYDCVLDVQRDGVIFHKVLDEYGVAHGGT
Macleaya cordata	N methylcoclaurine 3 hydroxylase, CYP82B subfamily	CYP82B	>OVA16215.1	MEIVTVALIAVVISSVLYLIFRDSGPKGLPPGPKPWPIVGNLLQLGDKPHSQFAELAQTYGDLFTLRMGTQTVVVASTPSAATEILKTHDRILSGRYVFQSFRVKDHVENSIVWSECNDTWKNLRKVCRTELFTQKMIESQAHVRERKAWEMVEFLKKKEGEEVKIVEVIFGTLVNIFGNLIFSQNIFELGDPSSGSVELKEHLWRMLELGNSTNPADYFPIMGRFDLFGQRKEVAECLQGIYDVWGAMLKERKAAKKARGNEGKNDFVEVLLDSGLNDQQINALLMELFGAGTETSASTIEWAITELTKNPKVTAKIGSELLTVVGHSTVKESDIPNLPYLQAFVKETLRLHPPTPLLLPRRALETCQVLNYTIPKECQIMVNAWAIGRDPKTWSNPL…
Macleaya cordata	3’‐hydroxy‐N‐methyl‐(S)‐coclaurine 4 o methyltransferase	4OMT	>OVA10701.1	MGLIDKPESQEVDIKAQAHLWNIIYGFADSLVLRCAVEIGIADIIKNNNGSISVTELSSKLPISNVNCDNLYRVLRYLVHMGILKEDSDINGVKLYSLQPVATLLLRDAERSMVPIILGMTQKDFMIPWHFMKEGLGNGSTAFEKGMGMTIWQYLEGHPEQSQLFNEGMAGETRLLTKSLIDGCRDTFEGLTSLVDVGGGNGTTIKGIYDAFPHIKCSLYDLPHVIANSHDHPNIERIPGDMFKSVPSAQAILLKLILHDWTDEECVSILEKCREAVPKETGKVIIVDVALEEESQHELTKTRLILDIDMLVNTGGRERTEDDWEKLLKRAGFRGHKIRHIAAIQSVIEAFP
Macleaya cordata	Berberine bridge enzyme (FAD-linked oxydase)	BBE	>OVA05128.1	MYMNYSPFSQIHTPNTSSYSYLLYPSVQNLRFNSSTTPKPLIILAPYCESDIKAAVICSRKYGLQIRVRSGGHDYEGLSSKSNVSFIIVDLVHFRSITVDVEDRTAWVQAGATIGEVYYKIAEKSRTLGFPAGTCPTVGVGGHFGGGGIGTLVRKYGVAADHVVEAYLLDINGRILNRKSMGESLFWAIRGGSCASFGIILSWKIKLVSVPPKVTVFTPFRNLEQGATKLVQKWQEIADKLHEDLFIRIVIQLGAGRKTIDVLFNSLYLGGVEELLKLMEKSFPELGLMAKDCTEMSWIQSVLYFAGYQKTESLDVLLNRTHQDTDFFKAKSDFVEKPISKIGLEGIWKRFLEEETVYMILDPLGGRMNKILESEIPFPHRKGNLYNIQYIVKWKDEGI…
Macleaya cordata	Berberine bridge enzyme (FAD-linked oxydase)	BBE	>OVA08657.1	MHGIQIKFRSGGHDYEGLSYVSDVPFVIVDLFNLQSISVDAEDRNAWVQSGATIGELYYRIAEKSRTLGFPVGACPTVGVGGHFSGGGYGTMLRKYGLAADNVIDARIVNVYGRILNKESMGEDLFWAIRGGSGGSFGVVLSWKIRLVYVPPIVTVFMIDKTLEQGATELVHKWQEIAHKLPQELFIRVILNSLKTIRASFHVSWGREVASNCDEREIS
Macleaya cordata	Hypothetical protein	BBE	>OVA12234.1	MQKIVLRGFSLVQLLVEFLIESHRRVKHSAFLQGFARLYVLVGISVEVGLVMLRKYGLAADNVIDARIVDVHGRILDKESMGEDLFWAIEGGGGGSFGVILSWKIRLVPVPPTVTVFRITRTLKQGATALVHRWQEVAPKLPHEI
Macleaya cordata	Berberine bridge enzyme (FAD-linked oxydase)	BBE	>OVA14705.1	MDHPNTSNTSLWKSPEVDELSRDVNPEFLRSGGHDVEGLSYVSDAPFVIVDLVNFRNIAVDVEDRSTWIQAGASLGQVYYRIAEKSKTLGFPAGFCPTVGVGGHFSGGGLGALVRKYGLSADQVIDARIVNVDGKILNKETMGKDLYWAIRGGGAANFGVILSWKVKLVTVPPIVTAATIDRTLEQGATDLVHKWQFIADRVHQDLYLAIIFTVANGSQASWEKTVKAQFIILLMWDLHKVDLRIKVL
Macleaya cordata	Berberine bridge enzyme (FAD-linked oxydase)	BBE	>OUZ99948.1	MDTKIRNLSSSLFIFISVLTCALGDDLLSCLTSHGVHNYTTPSSDSNSDYLRFLHVSIQNPLFENPATPKPAAIVMPRTKEELASTVRCCTRGSWTVRLRSGGHSYEGLSYTADTPFVLIDLMNMNRISIDVESETAWVESGATLGELYYAITESTDSFGFTAGWCPTVGSGGHISGGGFGMMSRKYGLAADNVVDAILIDGNGVILDRNSMGEDVFWAIRGGGGGVWGAIYAWKIKLLPVPKKVTVFRLMKHVKIEEASNLLHKWQFVADELDDDFTLSVLGGADENEVWLMFLGLYLGPKTVAKSTIDPKFPELGLIEEEFSEMSWGESFAYLAGLKTVGELNNRFLKFDDRAFKTKVDFAKEPIPLKVINGALEILSKEPRGFVALNGLGGMMSKV…
Macleaya cordata	Scoulerine 9’ O methyltransferase	SOMT	>OVA13718.1	MDAKLEEANNGCYISEAGNLGRLICLPMALRAAIELNVFNIISEFGPGAQLSSQDLVAKIPTTNPNAHIYLERILRLLAASSFLSVTTRTSSKSSPTSIINGRNGNINGGDQHHDKKVVTERVYGLTKESRCLVPREEDGVSLVPMLMFVADKVVVESFYNLKEVVLRQGCVPFDMTHGVSIFEYAGKEPRMNKVFNEAMGDFSVVAFDEVLKVYNGFVDMKELVDVGGGIGTSLSNIVAKYPHIRGINFDLSHVISVAPNYPGVEHVAGDMFEELPKAQNILLKWVLHDWDDEQCLKLLKNCWNSLPEGGKVIVIEFVIPSEIGDNAESFNALTPDLLMMALNPGGKERNLVEFYDLANATGFTKAKSHPISQGLHVIEFHK
Macleaya cordata	Canadine synthase	CAS/CYP719A2	>OVA13716.1	MEEISMQWISTTVIVVVVFAIMASTMFNSGRKSSMKWPDGPKTLPIIGNMHQLGGTALQVLLHKLADVYGSVMTIWIGSWRPVIVVSDIDKAWEVLVNKSSDYSARDMPEITRINTANWRTISTSDSGPHWSNLRKGLQNVALSPLNVAAQSQFQERDIEQLIKNLQEEAALNNGIVKPLDHLKKATVRLLSRMIYGQNFNDDEYVEAMHNEIEELIRISGYARLAEAFYYAKYLPSHKKVEKAVEEAHHRVKALIRPFLTRNPPPNSYLHFLHSQNYSEEVIIFCIYEVYLLGVDSTSSTTAWALAFLIREPAVQEKLYQELNNFIGGRQQMVGSAVKVEDVNKLQYLQAVMKETMRMKPIAPLAIPHKACKDTSLGGNRVDKGTRVMVNLHAIHHNL…
Macleaya cordata	Canadine synthase	CAS/CYP719A2	>OVA11723.1	MEESFWLVTASVIVVFALAKLLRKSSSISKMEWPAGPKKLPIIGNLHQLGGDVFHVVLANLAKVYGSVMTIWVGSWRPMIVISDIDKAWEVLVTKSSDYSARNLPDITKIISANWRNISCSDSGPFWQNLRKGLQGGALAPLNVISQYHLQEKDMQNLIKSMHLEASRNNGIIKPLDHLKQETVRLLSRLIFGQDFHDEKLVVGMHHALDDLVRISGYASLADAFKFAENLPSHKKSIREVYELKERVEKLVRPHIVSNPPTNTYLHFLQSQNFSEDVIISAILEVYDLGVDSTASTTVWALTFLVREQKIQEKLYQEIKNVTGGRSTVRVEEVSKLTYLQAVMKETMRMKPIAPMAIPHKTSRETSLMGKKVDKDTVIMVNLYAIHHNPNVFPEPYKF…
Macleaya cordata	Canadine synthase	CAS/CYP719A2	>OVA11724.1	MELEMIMSNPWILTATTVAVMIFITMIFTRKSSSMKWPIGPKTLPVIGNMHLLGGTALHVVLHNLAKVYGNVMTIWIGSWRPVIVVSDIERAWEVLVNKSSDYSARDMPEITKIISADWKTISTSDSGPFWTNLRKGLQNVALSPHNLAAQFQFQERDISKLIETLKEEAALNGGIVKPLDHLKKATVRLISRLIYGQEFDNDKYVEDMHHAIEELIRVSGYARLAEAFYYAKYLPSHKKAVRDVEEANRRVQNLVRPFLSFNPPTNSYLHFLRSQNYPEEVIIFAIFEAYLLGVDSTSSTTAWALAFLVREPKVQDKVYQELKNFTVNNGREMLKVEDINKLPYLQAVIKETMRMKPIAPLAIPHKACRETSLMGSKIDKGTRVMVNIYALHHNQKVW…
Macleaya cordata	Tetrahydroprotoberberine oxidase (FAD-linked oxydase)	STOX	>OVA00266.1	MGSSKSSIVVLTLLSFFVFSVTCATSSTLEDNFIQCLSLQQPSIPIPIYTQSNPSFTSIFLSSARNLRFVSAATPKPLLIILPSDESHIQAAIVCCRKQGLDLKVRSGGHDVEGLSYVSDAPFIIADLVNFRSININLQDNTAWVQAGANLGEVYYRISEKSKTLGFPAGFCPAVGVGGHFSGGGFGALVRKYGLAADQVIDARLVNVDGKILDRQSMGEDLFWAIRGGGASSFAVVLSWKINLVPVPPIVTVATVDRTLQQGATRLVLKWQFIADKLDEDLYIGVTPTVVNIPTQGGQQRTVVASFSILFLGRVDELLQLMQVSFPELGLTRNDTAEMSWVESHVYFYARGRPVEEVLLDRDDSQTKIFLKVKTDYVKIPISEIALEGIWRKFMEEEM…
Macleaya cordata	Tetrahydroprotoberberine oxidase (FAD-linked oxydase)	STOX	>OVA09353.1	MGISRSSSELVSLLSFIVLLSFSIGAASISSSVDDYGDDHFLQCLSVHQFSNNQVPVYTSKNSSFSTIFQSSARNLRFLSPKSTKPQFIITPSHESHVQAAVICCRKHGLDLKVRSGGHDVEGLSYVSDIVPFVMVDLSNFRNITIDVEDSSAWIQAGASLGEVYYRIGDKSKTLGFPAGLAPTVGVGGHLSGGGIGALVRKYGLAADQVIDAQIVNVDGKILNRKTMGKDLFWAIRGGGGASFGVILSWKVKLVPVPPIVTVATIDRTLEQDATNLVYRWQFVADRLDEDLYIGLKLSPVVSSERGGEKTVQAEFYILFLGRVDKLLQLMEQSFPELGLKSKDCTEMSWVESHIYFSAPGSPLELLLDRDPASKIFMKAKSDHVKVPISKDGLEGFWR…
Macleaya cordata	Tetrahydroprotoberberine oxidase (FAD-linked oxydase)	STOX	>OVA00263.1	MGISSSAVLSLLYYSLLLSSTSWPTSSSTSSVHEDFVQCIHLHKPPNSVPIYTPTNSSYSSLLQASARNLRFLSPTFLKPQLIVTPLHESHVQATVVCSHKHGLDVKVRSGGHDVEGLSFVSEAPFIIVDLINFRSIHVDVENGTAWVQAGANLGEVYYKIGEKSKTLGFPAGFCPTVGVGGHLSGGGFGALVRKYGLAADQVIDARIVNVNGEILDKETMGEDLFWAIRGGGASSFGVVLSWKIKLVPIPATVTVATIGKTLEQGAIDLVHRWQFIADRLHEDLYLGLTLTKVNATAQAVFSVLFLGGIENLLPLMKESFPELGLKREDCMEMSWVESHVYFYARGRPLEYLLNRNDPMSKVFMKAKSDHVKEPIPKDGLKGLWRRLVQEDMPVLLLT…
Macleaya cordata	Tetrahydroprotoberberine oxidase (FAD-linked oxydase)	STOX	>OVA03988.1	MGISSSSILSVLSYSLLIVLSISWPSNSSSSVHDEDFIQCISLHQPPNSIPIYTPNNSSYSSLLQSSARNLRFLSPIYRKPQLIITPLHESHVQVSVVCSRKHGLDVKVRSGGHDVEGLSFISDTPFILVDLIDFRSINVDVENRTAWVQAGANLGEVYYRIAEKSKTLGFPAGLIPTVGVGGHLSGGGFGALVRKYGLASDQVIDAHIVNVNGEILNKETMGEDLFWAIRGGGASSFGVILSWKINLVPVPAIVTVATVDKTLEQGAIDLVHKWQFIADRLHEELYVGLSLSVAVTNSSQAGTKTALARFFILFLGRVDKLLQLMEESFLEFGLKRDDCMEMSWVKSHVYLYARGEPLELLLNRNDPMSKMFMKAKSDHVKVPISKNGLEGLMTRLLE…
Macleaya cordata	Tetrahydroprotoberberine oxidase (FAD-linked oxydase)	STOX	>OVA14705.1	MDHPNTSNTSLWKSPEVDELSRDVNPEFLRSGGHDVEGLSYVSDAPFVIVDLVNFRNIAVDVEDRSTWIQAGASLGQVYYRIAEKSKTLGFPAGFCPTVGVGGHFSGGGLGALVRKYGLSADQVIDARIVNVDGKILNKETMGKDLYWAIRGGGAANFGVILSWKVKLVTVPPIVTAATIDRTLEQGATDLVHKWQFIADRVHQDLYLAIIFTVANGSQASWEKTVKAQFIILLMWDLHKVDLRIKVL
Macleaya cordata	Tetrahydroprotoberberine oxidase (FAD-linked oxydase)	STOX	>OVA09352.1	MVRSGGHDVEGLSYVSDAPFVIVDLVNFRNIAVDVEDRSTWIQAGASLGQVYYRIAEKSKTLGFPAGFCPTVGVGGHFSGGGLGALVRKYGLSADQVIDARIVNVDGKILNKETMGKDLYWAIRGGGAANFGVILSWKVKLVTVPPIVTAATIDRTLEQGATDLVHKWQFIADRVHQDLYLAIIFTVANGSQASWEKTVKAQFIILFLGRVDKLLQLMNENFPDLGLKGNDCKEMSWVESHIYLYERGKPLESLLDRDPINKSFLKVKTDYVKEPISKAGLQGIWKKLMEVEEPSMMWTPLGGVMNEISEFELPYPHRVGNIYNILYVGSCYVERDSRIQIGWMRRFYRYMGPYVSKNPRAAYLNYKDLDLGQNKNGKVNYSKAKMWGVKYFKGNFERL…
Nelumbo nucifera	Tyrosine decarboxylase 1 isoform X1	TYDC	>XP_010262477.1	MEGGMKPMDAEQLRENAHKMVDFIADYYKSIESFPVLSQVEPGYLRKIIPDSAPNQPESLQNVLDDIQAKIIPGVTHWQSPNFFGYFPSNSSIAGFLGEMLSGGLNIVGFSWVTSPAATELETIVLDWLAKMLKLPEDFLSSGQGGGVIQGTASEAVLVVLLAARDKALRMFGRNSIGKLVVYASDQTHSALRKACQIGGIHAENCRLLKTDSSTNYALSPEVLTEAISQDTASGLVPFFLCATVGTTSSTAVDPLLALGKIAKDNKMWFHIDAAYAGSACICPEYRHYLNGVEEADSFNMNAHKWLLTNFDCSVLWVKDRSALIQSLSTNPEYLKNKASEGNMVVDYKDWQIPLGRRFRSLKLWMMLRLYGQENLLNYLRNHIELAKYFEELVSVDQR…
Nelumbo nucifera	Tyrosine decarboxylase 1 isoform X1	TYDC	>XP_010262478.1	MEGGMKPMDAEQLRENAHKMVDFIADYYKSIESFPVLSQVEPGYLRKIIPDSAPNQPESLQNVLDDIQAKIIPGVTHWQSPNFFGYFPSNSSIAGFLGEMLSGGLNIVGFSWVTSPAATELETIVLDWLAKMLKLPEDFLSSGQGGGVIQGTASEAVLVVLLAARDKALRMFGRNSIGKLVVYASDQTHSALRKACQIGGIHAENCRLLKTDSSTNYALSPEVLTEAISQDTASGLVPFFLCATVGTTSSTAVDPLLALGKIAKDNKMWFHIDAAYAGSACICPEYRHYLNGVEEADSFNMNAHKWLLTNFDCSVLWVKDRSALIQSLSTNPEYLKNKASEGNMVVDYKDWQIPLGRRFRSLKLWMMLRLYGQENLLNYLRNHIELAKYFEELVSVDQR…
Nelumbo nucifera	Tyrosine decarboxylase 1 isoform X1	TYDC	>XP_010271797.1	MGSLSVPTDIFNPLDINTFTQESQMVLNFISDYYKNVENFPVQSQVEPGYLWKNSPNTPPNSPESLETILDDIRSSIIPGLTHWQSPNFFAFFQANASTAGFLGEMLCTGFNVVGFNWITSPAATELERVVMDWMGKLLNLPSPFLFSGNGGGVLHGSTCESIVCTLAAARDALLKEVGGDKITKLVVYGSDQTHFSLQKASKLVGIPPSNFRALATTASTGFGLCAHDVRKAMQEDVASGLIPLFLCATVGTTGCGAVDPIESLGHVAREYGVWFHVDAAYAGSACICPEYRHYLDGVEHADSISMNPHKWFLTNMDCCCLWVKNPRSLVDSLSTDPEILRNEATESMGVVDYKDWQIALSRRFRAMKLWVVIRRYGVANLMAHIRSDISLAKRFEAL…
Nelumbo nucifera	Tyrosine decarboxylase 1 isoform X1	TYDC	>XP_010245171.1	MGSLHADVLENNSAFGLNPLDPEEFRRQGHMIIDFLADYYRDIEKYPVRSQVEPGYLRKRLPESAPYNPEPIETILQDVQKEIIPGITHWQSPNYFAYFPSSGSIAGFLGEMLSTGFNVVGFNWMSSPAATELESIVMDWLGKMLKLPKSFLFSGNGGGVLQGTTCEAILCTVTAARDRVLNRIGRENIGRLVVYASDQTHCALQKAAQIAGIHPKNFRAIATSKATAFGLSPDSFRSTIVADIEAGLIPLFLCATVGTTSSTAVDPIGPLCEVAKEYGIWVHIDAAYAGSACICPEFRHFIDGVENADSFSFNAHKWFFTTLDCCCLWVKDPSSLVKALSTSPEYLRNKATESRQVIDYKDWQIALSRRFRSMKLWMVLRSYGVANLRNFLRTHVKMA…
Nelumbo nucifera	Tyrosine decarboxylase 1 isoform X1	TYDC	>XP_010275912.1	MGSLHTDVLENNSVCALNPLDPEEFRRQGHMIIDFLADYYRDIEKYPVRSQVEPGYLRKRLPDTAPYNPEPIETIMQDVQKEIIPGLTHWQSPNYYAYFPSSGSVAGFLGEMLSTGFNVVGFNWMSSPAATELESIVMDWLGKMLKLPTSFLFSGNGGGVLQGTTCEAILCTLTAARDRMLNRIGRENIGKLVVYGSDQTHCALQKAAQIAGIFPNNFRPVATSKATSFGLAPESLQSAIQADIEAGLIPLFLCATVGTTSSTAVDPIAPLCAVAKEYGVWVHIDAAYAGSASICPEFRHFIDGVEDADSFSFNAHKWFFTTLDCCCLWVKDPSALVKALSTSPEYLRNKATESKQVIDYKDWQIALSRRFRAMKLWMVLRSYGVANLRNFLRTHVKMA…
Nelumbo nucifera	Tyrosine aminotransferase (aminotransferase TAT2 isoform X3)	TyrAT	>XP_019052448.1	MNQILTVQRVPPTIFVLLSILLILFRQKIEDFSTVFEAIAEYLSTDLPYKLSPDDVYLTVGCAQAIEVVLTVLARPGANILLPRPGYPYYEARAAFSHIEVRHFDLLPENGWEVDLDAVEALADENTVAMVIINPGNPCGNVYSYQHLEKVAETAKKLGILVIADEVYDHLTFGCNPFVPMGVFGETVPVLTLGSISKRWIVPGWRLGWLVTSDPNGILKETKIVDCIIGCLNISSDPATFIQGAILQILEKTKGDFFKKIIDILRQDADIIYQRIREIGCITCPHKPEGSMFVMVKLDLSLLEDIKDDMDFCFKLAKEESVIVLPGVSVGLKNWLRITFAIEPSSLEEALERIKSFCKRHAKKK
Nelumbo nucifera	Tyrosine aminotransferase (aminotransferase TAT2 isoform X1)	TyrAT	>XP_019053683.1	MKNGTKRWGFVANQELNTASGITVRGVLNMVMAAVDPEDPRSTIPLGHGDPSKFPCFRTSEVAEDAIVEAVRSAKFNHYSPTVGILPARRAIAEYLSLDLPYKLSPDDVFLTLGATQAIEISLTVLARPGANILLPRPGFPYYEARAAFSHLEVRHFDLLPEKGWEIDLDAVEALADENTAAMVIINPGNPCGNVFSYQHLEKVAETAKKRGILVIADEVYDHLAFGSKPFVPMGIFGSTVPVLTIGSISKRWIVPGWRVGWLVTSDPSEILKKTKIVDGIKGCLNISSDPVTFIQLGCSITTWATRVQILETASMCLQGGALPQILEKTNKDFFRKIINILRQSSDICYEKIKEIDCITCPQKPEGSMFLMVKLNLSLLEDINDDIDFCYKLAKEECV…
Nelumbo nucifera	Tyrosine aminotransferase (aminotransferase TAT2)	TyrAT	>XP_010272356.1	MKNRASTGVITMLQRDPSIHSLSPLLLFFLLLLLIVLNPTRKQKQRRFLQVRATKEDVKEGTENYWSRKWGFRANQDLTTSTGITIRGLLQMLDVALDAGDPRPMIRLGHGDPSLFPCFRTSQIAEDAIVEAVRSAKFNHYPPFVGMLPARRAVAEYLSLDLPYKLSPDDVFLTLGCTQAIEIALSVLACPGANILLPRPGFPLYEARAAFNHLEIRHYDLLPEKGWEVDIDSIENLADENTVAMVIINPGNPCGNVFTYQHLRKVSETAKKLGILVISDEVYGHLTFGNNPFVPMGVFGSIVPVLTLGSISKRWIVPGWRLGWLVTSDPNGMLKRTQIVDCIKVCLNISSDPATFVQGALPQILGKTQEDFFKKIASILRQTSEICFEKIKEIDCITC…
Nelumbo nucifera	Tyrosine aminotransferase (aminotransferase TAT2 isoform X2)	TyrAT	>XP_010260306.1	MENGESKRWGFVANQGLNVASTFSIRGTLKMLMDAAAGQRSIIHLGQGDPSVFPCFRTSQIAEDAVADALRSAKFNSYAPPLGILPARRAIAEYLSNDLPYKLSPDDVFLTPGCKQSIDVVVSVLARPGANVLLPRPGFPHYEACAALNHLEVRHFDLLPEKGWEVDLDAVEALADENSVALVIVNPGNPCGNVFNYQHLEKIAETARRLGILVIADEVYGHLTFGSNPFVPMGVFGSTIPVLTFGSLSKRWMVPGWRLGWIVTSDPNGILKKTKGAVPRILGNTKDDFFKKIIDMFTQASEICYESIKSIDCITCPVKPEGSMFIMVKLNISLLEDIKDDTDFCLKLAKEESVIVLPGISVGLKNWLRITFAMELSSLKDAMERVRSFCQRHAKQQ
Nelumbo nucifera	Tyrosine aminotransferase (aminotransferase TAT2 isoform X2)	TyrAT	>XP_010260307.1	MKNGTKRWGFVANQELNTASGITVRGVLNMVMAAVDPEDPRSTIPLGHGDPSKFPCFRTSEVAEDAIVEAVRSAKFNHYSPTVGILPARRAIAEYLSLDLPYKLSPDDVFLTLGATQAIEISLTVLARPGANILLPRPGFPYYEARAAFSHLEVRHFDLLPEKGWEIDLDAVEALADENTAAMVIINPGNPCGNVFSYQHLEKVAETAKKRGILVIADEVYDHLAFGSKPFVPMGIFGSTVPVLTIGSISKRWIVPGWRVGWLVTSDPSEILKKTKIVDGIKGCLNISSDPVTFIQGALPQILEKTNKDFFRKIINILRQSSDICYEKIKEIDCITCPQKPEGSMFLMVKLNLSLLEDINDDIDFCYKLAKEECVIVLPGIAVGIKNWLRITFAVEPAS…
Nelumbo nucifera	Tyrosine aminotransferase (aminotransferase TAT2 isoform X1)	TyrAT	>XP_010260304.1	MENGESKRWGFVANQGLNVASTFSIRGTLKMLMDAAAGQRSIIHLGQGDPSVFPCFRTSQIAEDAVADALRSAKFNSYAPPLGILPARRAIAEYLSNDLPYKLSPDDVFLTPGCKQSIDVVVSVLARPGANVLLPRPGFPHYEACAALNHLEVRHFDLLPEKGWEVDLDAVEALADENSVALVIVNPGNPCGNVFNYQHLEKIAETARRLGILVIADEVYGHLTFGSNPFVPMGVFGSTIPVLTFGSLSKRWMVPGWRLGWIVTSDPNGILKKTKIVDCLQGYLNIYPDPVTFIQGAVPRILGNTKDDFFKKIIDMFTQASEICYESIKSIDCITCPVKPEGSMFIMVKLNISLLEDIKDDTDFCLKLAKEESVIVLPGISVGLKNWLRITFAMELSSL…
Nelumbo nucifera	Tyrosine aminotransferase (aminotransferase TAT2 isoform X2)	TyrAT	>XP_010250300.1	MENWHFKPNGEVNTAADITIRGILNMIMGALDAKDPRPTIPLGHGDPSVFPCFRTTPVAEDAIADVLRSAKFNCYAPNVGIPPARRAIAEYLSTDLPYKLSPDDVYLTVGCAQAIEVVLTVLARPGANILLPRPGYPYYEARAAFSHIEVRHFDLLPENGWEVDLDAVEALADENTVAMVIINPGNPCGNVYSYQHLEKVAETAKKLGILVIADEVYDHLTFGCNPFVPMGVFGETVPVLTLGSISKRWIVPGWRLGWLVTSDPNGILKETKGAILQILEKTKGDFFKKIIDILRQDADIIYQRIREIGCITCPHKPEGSMFVMVKLDLSLLEDIKDDMDFCFKLAKEESVIVLPGVSVGLKNWLRITFAIEPSSLEEALERIKSFCKRHAKKK
Nelumbo nucifera	Tyrosine aminotransferase (aminotransferase TAT2 isoform X1)	TyrAT	>XP_010250299.1	MENWHFKPNGEVNTAADITIRGILNMIMGALDAKDPRPTIPLGHGDPSVFPCFRTTPVAEDAIADVLRSAKFNCYAPNVGIPPARRAIAEYLSTDLPYKLSPDDVYLTVGCAQAIEVVLTVLARPGANILLPRPGYPYYEARAAFSHIEVRHFDLLPENGWEVDLDAVEALADENTVAMVIINPGNPCGNVYSYQHLEKVAETAKKLGILVIADEVYDHLTFGCNPFVPMGVFGETVPVLTLGSISKRWIVPGWRLGWLVTSDPNGILKETKIVDCIIGCLNISSDPATFIQGAILQILEKTKGDFFKKIIDILRQDADIIYQRIREIGCITCPHKPEGSMFVMVKLDLSLLEDIKDDMDFCFKLAKEESVIVLPGVSVGLKNWLRITFAIEPSSLEEA…
Nelumbo nucifera	Tyrosine hydroxylase	3OHase	>XP_019055212.1	MLSTGFNVVGFNWMSSPAVTDLESIVMDWLGKMLKLPKSFLFSRNSGGVLQGTTCEAILCTLTVARDRMLNRIGRENIGKLVVYGSDQTHCALQKAAHIVGIFPNNFRAVATSKEFGFTSTQHTLEVHGYVLSLDTSSMG
Nelumbo nucifera	Aromatic-L-amino-acid decarboxylase-like	HPPDC	>XP_010277895.1	MGSFTTSFPESPLGEFKPLDPEEFRKRAHQTVDFIADYYNSIESYPVLSQVEPGYLRNQLSQTAPYNPEPFEAVLKDVQKDIIPGMTHWLSPNFFAYFPATVSTAAFLGEMLCTSFNSVGFNWLASPAATELEIVVMDWLAEMLKLPKSFMFSGTGGGVLQGTTSEAILCTIVAARDRALERIGKENISKLVVYGSDQTHSTYAKACKIAGILPCNIRAIATTADAAFALSPSLVREAIEADVAAGLVPIYLCATVGTTSTTAVDPLTALAEVANSFDVWLHVDGAYAGSACICPEFRSYLDGIERADSLSLSPHKWFLTFLDCCCLWVKQPSLLLKALSTDPEYLKNKLSESNNVVDYKDWQVGTGRKFRALRLWLVLRCYGVANLQSHIRTDVGMAN…
Nelumbo nucifera	Tyrosine/DOPA decarboxylase 2-like	HPPDC	>XP_010245171.1	MGSLHADVLENNSAFGLNPLDPEEFRRQGHMIIDFLADYYRDIEKYPVRSQVEPGYLRKRLPESAPYNPEPIETILQDVQKEIIPGITHWQSPNYFAYFPSSGSIAGFLGEMLSTGFNVVGFNWMSSPAATELESIVMDWLGKMLKLPKSFLFSGNGGGVLQGTTCEAILCTVTAARDRVLNRIGRENIGRLVVYASDQTHCALQKAAQIAGIHPKNFRAIATSKATAFGLSPDSFRSTIVADIEAGLIPLFLCATVGTTSSTAVDPIGPLCEVAKEYGIWVHIDAAYAGSACICPEFRHFIDGVENADSFSFNAHKWFFTTLDCCCLWVKDPSSLVKALSTSPEYLRNKATESRQVIDYKDWQIALSRRFRSMKLWMVLRSYGVANLRNFLRTHVKMA…
Nelumbo nucifera	Tyrosine/DOPA decarboxylase 2-like	HPPDC	>XP_010275912.1	MGSLHTDVLENNSVCALNPLDPEEFRRQGHMIIDFLADYYRDIEKYPVRSQVEPGYLRKRLPDTAPYNPEPIETIMQDVQKEIIPGLTHWQSPNYYAYFPSSGSVAGFLGEMLSTGFNVVGFNWMSSPAATELESIVMDWLGKMLKLPTSFLFSGNGGGVLQGTTCEAILCTLTAARDRMLNRIGRENIGKLVVYGSDQTHCALQKAAQIAGIFPNNFRPVATSKATSFGLAPESLQSAIQADIEAGLIPLFLCATVGTTSSTAVDPIAPLCAVAKEYGVWVHIDAAYAGSASICPEFRHFIDGVEDADSFSFNAHKWFFTTLDCCCLWVKDPSALVKALSTSPEYLRNKATESKQVIDYKDWQIALSRRFRAMKLWMVLRSYGVANLRNFLRTHVKMA…
Nelumbo nucifera	Tyrosine/DOPA decarboxylase 2-like	HPPDC	>XP_019055212	MLSTGFNVVGFNWMSSPAVTDLESIVMDWLGKMLKLPKSFLFSRNSGGVLQGTTCEAILCTLTVARDRMLNRIGRENIGKLVVYGSDQTHCALQKAAHIVGIFPNNFRAVATSKEFGFTSTQHTLEVHGYVLSLDTSSMG
Nelumbo nucifera	S-norcoclaurine synthase 2-like	NCS	>XP_010247382.1	MIHSVSTELEVDLPADDIWAVYSSPELPKLVVKLMPHVYDKIDIVEGDGGVGTVLQIVLTPEMMEPRTWKEKFVEINDGRRKKVVRQIEGGYLDMGFHFYEDIFKIKKKSDSSCIIKSKSVFRVDHKHKANASLVTPDASAEMAKAVAEYAKQKKANSSSSSKDKAKACYE
Nelumbo nucifera	S-norcoclaurine synthase 1-like	NCS	>XP_010247383.1	MMIGRVVNEMEVGVPADDIWAVYSSPELPRLFVQLMPNVYKKIDILQGDGTVGTVLHIELADGIPEPRTWKEKFIKIDHQHREKVVRQIEGGFLDMGFRVFDVIFKIIEKDACSCIIRSTTAFELDEKFENNANLITAGNLWGAAKAISNYVIQNKSKRRNH
Nelumbo nucifera	S-norcoclaurine synthase 2-like	NCS	>XP_010247387.1	MHAGQLSHELEVAVPASEVWEIYGTLKLGKLCEELLPDVIHKAEVVEGDGGVGTVLKVTLPPGLVSYKEKFTKIDNEKRLKEVEVVEGGALDLGFRLYRIRLEIIEKTEVSSLIKSTVEYEIDDESANNPSFATTKPLEQIAMAMGKYLTELKTE
Nelumbo nucifera	S-norcoclaurine synthase 2-like	NCS	>XP_010274281.1	MRGQVTNELDVDVPVDDIWAVYGTPVLPTHIVQLQPDVFQKVDFIHGNGGVGTILYVQLVPGAPEPRTWKEKFIKIDDEERLKVIRMIEGGYLDLGFTLFEYNTQIIEKDAESCTIRSTTVFEVDEKFEANAALINATSAYGLAKAVANYVIQKKAKACDV
Nelumbo nucifera	S-norcoclaurine synthase 1-like	NCS	>XP_019052207.1	MMTARVTNEMEVGVPADDVWAVYGSPDLPKLFVQLMPQVYKRNDVLEGDGTVGTVILIELDDALPEPRIWKEKFIKIDHQEREKLVRVIEGGFLDIGFRSFDIIFKVIEKDASSCIIQSTTAFELDDKFEDNANRITAGTLWWVAKAISNYVIQNKSKSKSDNN
Nelumbo nucifera	(RS)-norcoclaurine 6-O-methyltransferase-like	6OMT	>XP_010244054.1	MEIQKEGQAAAAKIWKFVYGFADCLVLRCAIDLGIADIIHKQGEPLTLSELGAQIPVQPVNTDHLHRLMRYLVHMKIFTKETLDGEARYGLAPPAKFIVKGWDKSIVSIILVVTDKDFMAPWHCLKDSLCGEGTAFEKALGRSIWTYMADHPEKNKLFNEGMACDTKLLISALVQDCKDLFQGIMSLVDVGGGTGTAMRAIAKAFPHLKCTIYDLPHVIADSPDYPEVDRIAGDMFKHIPSADAILLKCILHDWDDGECIEILKRCKESVPREGGKVIIVDIVVDLESKHPLTKTRLSLDLDMMVTTGGKERTEAEWKKLLNAAGFPVFKITHISAVQSVIVAYPY
Nelumbo nucifera	(RS)-norcoclaurine 6-O-methyltransferase-like	6OMT	>XP_010247901.1	MEIPKEVQADEVEIWKFGYDFADTLVLRCAIEFGIADIIHKQGEPLTLFELGAQIPVQPVNTDHLHRLMRYMVHMKIFTKETLGGEEXYGLSPHGKFLVKGWDKSMASAILAITDEDFFAPWHCLKDVLAGEGTAFEKALGKSIWAYVADHPEKNKLFNEVMACDTSFITSVLIQDCKDVFQGIKSVVDVGGGTGTAMRDIAKAFPHLKCTIYDLPHVIADSPDYPEVDRIAGDMFKHIPSADAILLKWILHDWDDGECIEILKRCKESVPREGGKVIIVDIVLDPESKDPLTKARLRLDLDMMVYTGGKERSEAEWKKLLNAAGFPGYKILHVAAVQSVIMAYPY
Nelumbo nucifera	(RS)-norcoclaurine 6-O-methyltransferase-like	6OMT	>XP_010247902.1	MEIQKEVQAADVEIRKFGYGFADILVIRCAIQLGIADIIHKQGEPLTLSELEAQIPVKPVNTDHLHRLMRYMVHMKIFTKETPDGEERYGLAPLGKFLVNGWDRNMVSAILAVTDKDFMVPWYRLKDSLVGEGTAFEKALGKTICECMADHPEKKKPFNEAMACDTTRLLTSALIQDCKDLFQGIMSLVDVGGGTGTAMRDIAKTFPHLKCTIYDLPHVIADSPDYPEVDRIAGNMFKHIPSADGILLKCILHDLGDRQCIEILQRCKESVPREGGKVIIVDIVLDPESTDPLTKARLRLDLDMMVYTGGKERSEAEWKKLLNAAGFPRYKILHIAAVQSVIEAYPY
Nelumbo nucifera	(RS)-norcoclaurine 6-O-methyltransferase-like	6OMT	>XP_010271691.1	MENQKEVQAAEAKIWNFVYGFADTLVLRCAIELGIADIIHKQGEPLTLSELGAQIPLKSVNTDHLHRLMRYLVHMKLFTKETLDGEARYGLAPPAKLLVKWWEDKGLASIIFGITDKDFIAPWHHLKDSLAGDGEETTFEKVLGKSISTYMADHLEKSMLFNESMVHDTRLFTSVLIQDFKDVFQGIKSLVDVGGGSGTDMGAIAKAFPHLKCTIYGLPHVIADSPDYPEVDRISGDMFKHIPSADAILLKCILHYWGDGQCIEILKRCKESVPREGGIVIIADAVVDLESKHPYLTKTLLSTDLDMMLNTGGKERTEAEWKKLFNAAGFPAYKITHVADVEYSVIEAYPY
Nelumbo nucifera	(RS)-norcoclaurine 6-O-methyltransferase-like	6OMT	>XP_010272383.1	MGQGDEMELEAQAQIWKYIFSFVDSFTLRSAVELGIPDIIHSQGRPITLSQLSACLPIDYANPDRLNRLMRYLVSIGIFSREHGSADDEDDQEDKFGLTCLSKLLVRKLENNMVPFSMLDFKVLMEPWYHLTWSLDGRASGVTAFERVYGTKFWDYAGQDLEFGEKLNEAMACDTSSTMPTLLQQFNQVFADMSSVVDVGGGTGTAAMAIAKSFPNVKCTVFDHPHVVVDDQSDSGGVAKVSGDMFNFIPRADNLLLKWILHNYGDEDCLVILKRCKEALPERGGGKVVIVETVMEGDHNDETAAEIHDDEFTPCRLIMDMEMMLLFGGKERTAKEWQSLVERAGFRRCTMERINSSMHSLIQAYP
Nelumbo nucifera	(RS)-norcoclaurine 6-O-methyltransferase-like	6OMT	>XP_010272384.1	MGQGDEMELEAQAQIWKYIFSFVDSFTLRSAVELGIPDIIHSQGRPITLSQLSACLPIDYANPDRLNRLMRYLVSIGIFSREHGSADDEDDQEDKFGLTCLSKLLVRKLENNMVPFSMLDFKVLMEPWYHLTWSLDGRASGVTAFERVYGTKFWDYAGQDLEFGEKLNEAMACDTSSTMPTLLQQFNQVFADMSSVVDVGGGTGTAAMAIAKSFPNVKCTVFDHPHVVVDDQSDSGGVAKVSGDMFNFIPRADNLLLKWILHNYGDEDCLVILKRCKEALPERGGGKVVIVETVMEGDHNDETAAEIHDDEFTPCRLIMDMEMMLLFGGKERTAKEWQSLVERAGFRRCTMERINSSMHSLIQAYP
Nelumbo nucifera	(RS)-norcoclaurine 6-O-methyltransferase-like	6OMT	>XP_010276063.1	MEEDMKAQAQVWKHIYGFVESFTLKCAIELGIADILYEHGQPMTLSELASSIPLPSVSQDGLYRVLRYLVHMKLFDLQVDSDGLKKYRLTPASKLLVKNQEKNLASFVLLQLYEIDTWNHLSAAVEGTVTPWEKCHGGVDYIEYFKKDSVANQLLSDAMTSHTSMVTDALVKGCKKAHILDGVGSLIDVGGCTGVAARAIAKWFPSIKCAVFDLPHVVANAPECPEVTRIGGDMFVSIPKTDVVFMKSVLHDWGDEDCVKILKKCKEAISEKGGKAVIVDIVMDVESSPNEFTGARLGMEMDMLVAVGGKERSEKEWHKLFKEAGYSGYKITPIVAIESIIEVFP
Nelumbo nucifera	(RS)-norcoclaurine 6-O-methyltransferase-like isoform X1	6OMT	>XP_019055563.1	MEDMKAQAQVWKHIYGFAESLALKCAIELGIADILYEHGQPMTLSELASSIPLPSVSQDGLYRVLRYLVHMKLFDLQVDSDGLKKYWLTPASKLLVKSQEKNLASFALLIFYEMDAWHHLSAAVEGTVTPFEKCHEGEDLEELFGKDSVINRLLSEGMTNLTSLMADALVKGCKKAHILDGVGSLIDVGGSTGVAARAIAKSFPSIKCAVLDLPHVVANAPECSEVTWIEGDMFVSIPKTDVVFMKVRSVLHDCGDEDSVKILKICKEAISEKGGKVVIVEIVMDVESSSSPNEITGAKLNLDMSMLVTPGGKERSEEDWQKLFKEAGYSRYKITPIAAFESIIEVFP
Nelumbo nucifera	(RS)-norcoclaurine 6-O-methyltransferase-like isoform X2	6OMT	>XP_019055564.1	MEDMKAQAQVWKHIYGFAESLALKCAIELGIADILYEHGQPMTLSELASSIPLPSVSQDGLYRVLRYLVHMKLFDLQVDSDGLKKYWLTPASKLLVKSQEKNLASFALLIFYEMDAWHHLSAAVEGTVTPFEKCHEGEDLEELFGKDSVINRLLSEGMTNLTSLMADALVKGCKKAHILDGVGSLIDVGGSTGVAARAIAKSFPSIKCAVLDLPHVVANAPECSEVTWIEGDMFVSIPKTDVVFMKSVLHDCGDEDSVKILKICKEAISEKGGKVVIVEIVMDVESSSSPNEITGAKLNLDMSMLVTPGGKERSEEDWQKLFKEAGYSRYKITPIAAFESIIEVFP
Nelumbo nucifera	(S)-coclaurine N-methyltransferase-like	CNMT	>XP_010261992.1	MDALIQVPYDATIRLMLSSLERNLLPDVVIRRLTRLLLASRLRWGYKPSSQLQLSDLLQFVHSLKEMPIAIKTDLPKSQHYELPTSFFKLVLGKNLKYSCCYFLDKSSTLEDAEKAMLELYCERAQIKDGQSVLDVGCGWGSLSLYIAQKFSSCRITGICNSKTQKAYIEEQCRELKLQNVEIIVADISTFEMEASFDRILSIEMFEHMKNYKALLNKISKWMKEDSLLFVNYFCHKAFAYHFEDKNEDDWITRYFFTGGTMPAANLLLYFQDDVSVVNHWLVNGNHYARTSEEWLKRMDQNMASIKPIMESTYGKDSAVKWTAYWRTFFISVAELFGYNNGEEWMVALFLFKKKIN
Nelumbo nucifera	(S)-N-methylcoclaurine 3'-hydroxylase isozyme 2	NMCH/CYP80B3	>XP_010241290.1	MEIMAQAALAGEVINLLFPVFLSLCLFFLFIKLIKSASSATGPPLPPGPHPWPVVGNIFRLGRKPHVRLSQLAQVHGPLMSLSLGRQLIVVASSPATATQILKTHDKILCGRYAPVSSRRNDQLKYLDNFLWTELFSTRAIDSQAALREKKVRELIRYLGSKEGEVVNIGEVMFATVFNILCNLFLSKDFISLEDDEIMKGGIKRLLRSISEVASTPNLADLFPILGPLDIQGLNKKARELFVKITAMWEDIIKERREAQSAGGHVSRQRDLLDVLIDNNFSDDQINNLLLKLFTAGTHTSSSTIEWAMAEMMKNQESLVKARIELAREIKRENQVREADLCNLVYLNACLKETLRLHPPAPFLLPHRAIKTCTVMNYTIPKDSQVFVNVWAIGRDSMA…
Nelumbo nucifera	(S)-N-methylcoclaurine 3'-hydroxylase isozyme 2	NMCH/CYP80B3	>XP_010253989.1	MALLALFILFLLSILSLVLFLKPSSKKLPPGPFSWPIIGTQLPSPTMKPNLELFKLAQRYGPLMLFRFGFENVVVASNHVAAMEVLKNQDRVLSGRFKANSVRVKGYIEYSMVWADCTDYWKMVRKILRTELFSTKMLDVHAHVREEKVSELMKFLRRKEGEEVNFVDVIFGCILNMLGALIYSKDVYDFEDKTDINLGMKGMIRQLMILAATPNIADLYPIFFDGSDFQGLRKESAACVKRMSESWAAIINERRKNNDHTKNDLLQVLLDSGFSDPQIDAIFLETFGPGSDTSASTIEWALAELLRNPEKLVKLHEELDRVIGRNNTVKDSDLPNLPYLHACVKETLRLHPPVPFLIPHIALESCEVMNYTIPKGSEVLVNLYAIGRDPTTWDNPNSF…
Nelumbo nucifera	(S)-N-methylcoclaurine 3'-hydroxylase isozyme 2	NMCH/CYP80B3	>XP_010253990.1	MALLVSFIFFLLSILSVVLFLKPSPNNLPPGPFSWPIIGTLLPKLKKQPHVELSKLAQRFGPLMLLKFGVEPVVVASSHVAAVEVLKNQDRLLSGRFAPHSVRIKGYIEHSMVWADCTDYWKMVRKVWRTELFSTKMLDIQAHAREEKVSELMKFLIRKEGEKVNFADVIFGSILNILGALIFSKDVYDFEDRTDNNLGMKGMIRQLMILAAIPNLADLYPILGGSDFQGLRKASAACVKRMNESWAAIVKQRRKNDDHSKNDFLQVLLDSGFSDPQIDAMLLETFGPGSDTSTSTIEWAMAELLRNPEKLVKVREELDRVIRRSNNVKESDLPNLPYLHACVKETLRLHPPVTFLLPHRAMETCQMMNYTIPKGCQLMVNTYAIGRDSKTWEKPLSFL…
Nelumbo nucifera	(S)-N-methylcoclaurine 3'-hydroxylase isozyme 2	NMCH/CYP80B3	>XP_019051733.1	MAEIMRKIQDELDDVVGKNSTVEELHIPKLHCLDAVVKENLRLHLVAPLLLPRHPSKSCYVARYTIPEGAQVLVNAWGIHRDPEAWDNPLEFHPESFLTKNGKWDYSGNNFHYFPFGTGRRICAGIPLAKRLLPYVLASLLHLFERRFADGTEIDMLEKTGITLKKMIPLVVVPKPRLLLEKYGYWFCG
Nelumbo nucifera	Berberine bridge enzyme-like 4	BBE	>XP_010261629.1	MGSSSTSALLSLLSILVLVPWATSASVEETFLQCLSLRSNPSSPISALVYSSNNSSYQSIYTSTIQNLRFLQSDTPKPLFIITPLNESHVQTAVICAKENGLEIRIRGGGHDYEGLSYRAEVPFLIVDMSNLKTITVDIEDNSAWVQAGATLGELYYRIAEKSNVHGFPGGVCHTVGVSGFLGGGGYGYMLRKYGLGADQVIDAQMVDANGQILNRETMGEDLFWAIRGGGAASFGIILRWKVKLVPVPPVVTIFNPSKTIEEGATKLVHRWQYIADKLHEDVFIRANLELTNTSSGGKTIKVTFSSMFLGTIDTLLPLMNESFPELGLKREDCTEMSWIDAVKNLGGFPDSTVEVLLNRSLQSKSTYKMKSDYVKQPIPESAFEGIWKRFLQVETPIM…
Nelumbo nucifera	Berberine bridge enzyme-like 4	BBE	>XP_010261630.1	MGSSSTSAILSLFFILVLVPWATSASVEERFLQCLSLHSDPSSPISAVVYSPNNSSYLSIYTSTITSLRFLQSSARKPLFIITPSTESHVQTAVICAKENGLEIRIRGGGHDYEALSSMAEVPFVIVDMSNLKTITVDIEDNSAWVQAGATLGELYYRIAEKSNVHGFPGGVCHTVGVSGFLGGGGYGYMLRKYGLGADQVIDAQMVDANGKILNRETMGEDLFWAIRGGGAASFGIILRWKVRLVPVPPVVTVFNPSKTIEEGATKLVHRWQYVAHKLHEDIFMRINLALTSTSSGGKTVNVEFSSMFLGTIDRLLPLMNESFPELGLKREDCTEMSWIDAMKYLGGFPDSTLEVLLNRTLQSKSLSKNKSDYVKKPIPESAFEGIWKRFLQMEIPVM…
Nelumbo nucifera	Berberine bridge enzyme-like 4	BBE	>XP_010261631.1	MEGSSLTSAILSLLSILVLVQWATSSASVEESFLQCLSLRSNPSSPISAVVYSSSNSSYQSIYTSTLQNLRFLQSDTPKPVFIITPLNESHVQAAVICAKENGLEIRIRGGGHDYEGLSYRAEVPFVIVDMSNLKTITVDIENNSAWVQAGATLGELYYRIAEKSNVHGFPGGVCSTVGVSGFLGGGGYGFMLRKYGLGADHVIDAHMVDANGKILNRETMGEDLFWAIRGGGAASFGIILWWKVNLVPVPPVVTVFNPSRTIEEGGTKLVHRWQYIADKVDEDLFIRANLALTNTSSGGKTIKVTFRSLYLGTIDKLLPLMNKSFPELGLQREDCTEMSWIDAIKNIGGFPNSTIDVLLNRTLQDKRTYKVKSDYVKEPIPEFVFEGLWKRFLQMEIP…
Nelumbo nucifera	Berberine bridge enzyme-like 4	BBE	>XP_019053801.1	MGSWLTSAILCLLSILVLVXWATSASVEESFLRCLSLRSNPSSPISAVVYSSNNPSYQSIYTSTIQNTRFLQSDTPKPLFVITPLNESHVQAAVICAKENGLEIRTRGGGHDYEGISYRAEVPFVIVDMSNLKTITVDIEDNSAWVQAGATLGELYYRIAEKSNVHGFPGGVCSTVGVSGFLGGGGYGYMLRKYGLGADHVVDAHMVDANGKILHRETMGEDLFWAIRGGSAASFGIILWWKVNLVPVPPVVTLFNPSKTIEEGGTKLLHRWQYIADKLHEDLFMRANLRLAKTRSGGKTIAVTFRSLYLGTIDKLLPLMNESFPELGLRRENCTEMSWIDAIKNIGGFPNSTNDILLDRSRQSKRNQKVKSDYVKEPIPEFVFEGIWKRFFQMEGPVM…
Nelumbo nucifera	(S)-scoulerine 9-O-methyltransferase-like	SOMT	>XP_010242195.1	MDGGDPSISGSPHEDDMEVGLPSAPRFDIDLEEECQSTELAHLEVVAESNRPVKDKTKGSDGVPEIDMEFESEERAYNFYNKYGGKVGFSIRRSWANKCKDGVVRRRLFCCSRQGHRSHDKRDVKNHRPETRTGCLAHMVIALQPNGRYRVCQFEPNHNHDVGKPSKSRMLRSQKASAAAQAAETDISDSTGWGLGRLICIQMSIRAAIELDVFNIIAEAGPGAQLSSSEMVTKMPTTNPNAATALDRILRMLGANCILSMSMRPCNEGEKKHERVYGLTSKSRSLVTTNGEGASVAPIVLASSEKAVIESLYLLKDAVLEQGCIPFNKAHGLSFLEYAAKEPGMKAVFDQALGTRSAIFFHEVLKVYKGFNDIRELVDVGGGTGSLLGMIVSRFPHIR…
Nelumbo nucifera	(S)-scoulerine 9-O-methyltransferase-like	SOMT	>XP_010261275.1	MDAEDRASRLSGLRLAGLICVPMALRAAIKLKVFDIMAQAGPDARLSASEMVHRMAATNPNAATALDRILRILAANSILSFSLRPRDDGSEPEKVYGLTSESRWLVPGDDGASVAPEMLLTLDKAVVESFYCLQDAVVEEGCIPFEKAHGTDVFEYGAKEPEFNKAYPDAMNNGSAIALAEVFKVYKGFDGVTEMVDVGGGTGVSIGFIVSRYPNFRGVNFDLPHIISHPPPLQGVEHVGGNMFEEIPNEETIFMKWILHNWDDGRCVTLLKKCWRALPHGGKVIIVEFVIPPVLGTDAVSRYTLSADLFMMACNPGGKERTVTEFYGLAMAAGFAEMKNCPIGHGLHVIEFHK
Nelumbo nucifera	Canadine synthase	CAS/CYP719A2	>XP_010267084.1	MQGNQGLILASVIFVVAIVQMMIRKRRTSPTAMKWPAGPRKLPIIGNMHQLSRADGLFHVALTKLAKVHGSVMTIWLGSWRPTIVVSDDEVAWEVLVNKSSDYAARDHPYIDKIMWAGARTIHTSDASPHWHSLRKGLQSGGLGPLSISGQTHLQEKDIAQMLRDMREEASLNGGLVKPFHHIRRTSVRLLCRLCFGPNFEDAKFSEAIDKAIEDIIRISGVGYLADAFFFGRHFPGLKHTFQEACDLKRRVEDLIRPFLRAVPPPNCYLHFLLSNNIPEDVTIFTILEVFTLGIDSTSSTATWALALLTNEQRVQQKLYQDIKKNIDSTQQIVRVEDVSKLQYLQAAVKETLRLKPVAPLVPHMTATETTLMGTKVAQGTRVVVNLHAIHYNPNVWPE…
Nelumbo nucifera	Tetrahydrocannabinolic acid synthase-like	STOX	>XP_010261633.2	MTRMGTIIRLHIHSPTTKNEMGNPTFPLLSILSILLLYFSVSWAASDSIHESFLHCLSLQSDPSLPISTVVYTPNSSSYSSIFESNIGNIRFLSANSLKPQFIITPLTESHVQAAVICSRIHDLQIRSRSGGHDYEGLSYVSEIPFVIVDMANLRSIHVDIEDNSAWVQADATIGEVYYKIAEKSRIHGFPSGFCPSVAAAGHFSGGGYGTLMRKFGLSADNIVDAYLVDVRGRILNRESMGEDLFWAIRGGGGASYGIILSWKIRLVPVPPTVTVFTVSKTIEEGATELVNRWQYIADKVHEDLFIRVILILVNSGQSGRKTGQAQFNSLFLGGVDKLLPLMNESFPELGLKRSDCIEMSWIESTVYFSGSSNLSLEVLLDRRPQSKRMFKAKSDYVK…
Nelumbo nucifera	Tetrahydrocannabinolic acid synthase-like	STOX	>XP_019053812.1	MGSSSTSAVLSLLSILLLVPWVTSTSVEESFLQCLSLHSDPSSPISAVVYSPNNSSYLSIYRSSIQNLRFLQSDTPKPLFIITPLNESHVQTAVICAKENGLEIRTRGGGHDYEGRSYVAEVPFVIVDMSNLKTITVDIENNSAWVQAGATLGELYYRIAEKSNVHGFPGGVCHTVGVSGFLSGGGYGYMLRKYGLGADHVIDAHMVNANGKILNRETMGEDLFWAIRGGGAASFGIILWWKVNLVPVPPVVTVFNPSKTIEEGGTKLVHRWQYIVDKVDEDLFMRANLELTNTSSGGKTIKVSFSSLYLGTIDKLLPLMNKSFPELGLQREDCTEMSWIDAIKNIGGFPNNTIDVLLNRTLQDKRTYKVKSDYVKEPIPEFVFEGIWKRFLQIEIPVM…
Nelumbo nucifera	Tetrahydrocannabinolic acid synthase-like	STOX	>XP_010276872.1	MGTSACVVLLLLSFLLFSIPMATSNPINETFLQCLSSNSDPSIPISKLVYSPNNSSYLAIYNSSIQNLRFLSSDTPKPQFIITPSDASHVKAAVICSRVHGLQIRVRSGGHDYEGLSYVSKIPFIIIDVSNLRAISINISDNSAWVQAGATIGEVYYRIAEKSRIHGFPAGLCLTLGVGGHFSGGGYGTLMRKYGLAADNIIDAVLVDVNGRILNRESMGEDLFWAIRGGGGASFGVILSWKIRLVPVPPTVTVFRLVRTLEEGAIDLVHRWQEIASNLHEDLFVRVILGFDKNKTMNPLFISLFLGGADKLLPLMNESFPELGLERKDCMEMSWIESMLYFGGQENKSLEVLLDRNIQDRRIYKAKSDYVKEPIPKSVLESVLMKSFYEVEQPVMILS…
Papaver nudicaule	Tyrosine decarboxylase	TYDC	>MCL7041797.1	MGSLNTENVLENSSAFGVTNPLDPEEFRRQGHMIIDFLADYYRDVEKYPVRSQVEPGYLSKRLPETAPYNPESLETILQDVTTEIIPGLTHWQSPNYYAYFPSSGSVAGFLGEMLSTGFNVVGFNWMSSPAATELESIVMDWFGKMLNLPKSFLFSGTGGGVLQGTTCEAILCTLTAARDRKLNKIGREHIGRLVVYGSDQTHCALQKAAQIAGINPKNFRAVKTFKANSFGLAAATLREVILEDIEAGLIPLFVCPTVGTTSSTAVDPIGPICEVAKEFGMWVHVDAAYAGSACICPEFRHFIDGVEEADSFSLNAHKWFFTTLDCCCLWVRDPSALVTALSTNPEYLRNKATESRQVVDYKDWQIALSRRFRSMKLWMVLRSYGVTNLRNFLRSHVK…
Papaver nudicaule	Tyrosine decarboxylase	TYDC	>MCL7036626.1	MGSLNTENVLENSSAFGGVTNPLDPEEFRRQGHMIIDFLADYYRDVEKYPVRSQVEPGYLRKRLPETAPYNPESIETILQDVTTEIIPGLTHWQSPNYYAYFPSSGSVAGFLGEMLSTGFNVVGFNWMSSPAATELESIVMDWFGKMLNLPKSFLFSGSGGGVLQGTTCEAILCTLTAARDRKLNKIGREHIGRLVVYGSDQTHCALQKAAQIAGINPKNFRAVKTFKANSFGLAASTLREVILEDIEAGLIPLFVCPTVGTTSSTAVDPIGPICEVAKEFEMWVHVDAAYAGSACICPEFRHFIDGVEEADSFSLNAHKWFFTTLDCCCLWVKDPSALVTALSTNPEYLRNKATESRQVVDYKDWQIALSRRFRSMKLWMVLRSYGVTNLRNFLRSHV…
Papaver nudicaule	Tyrosine decarboxylase	TYDC	>MCL7043590.1	MGSLPTNNLESMSLCSQNPLDPDEFRRQGHMIIDFLADYYKNVEKYPVRSQVEPGYLKKRLPESAPYNPESIETILEDVTNDIIPGLTHWQSPNYFAYFPSSGSIAGFLGEMLSTGFNVVGFNWMSSPAATELESIVMNWLGQMLTLPKSFLFSSDGSSGGGGVLQGTTCEAILCTLTAARDKMLNKIGRENINKLVVYASDQTHCALQKAAQIAGINPKNFRAIATSKATNFGLSPNSLQSTILADIESGLVPLFLCATVGTTSSTAVDPIGLLCGVAKKYGIWVHIDAAYAGSACICPEFRHFIDGVEDADSFSLNAHKWFFTTLDCCCLWVKDSDSLVKALSTSPEYLKNKATDSKQVIDYKDWQIALSRRFRSMKLWLVLRSYGVANLRTFLRSH…
Papaver nudicaule	Tyrosine decarboxylase	TYDC	>MCL7024230.1	MGSLPTGNLESMPMCSQNPLDPDEFRRQGHMIIDFLADYYKNVESYPVRSQVEPGYLRKRLPETAPNNSESIETILQDVTNDIIPGLTHWQSPNYFAYFPSSGSIAGFLGEMLSTGFNVVGFNWMSSPAATELESIVMNWLGQMLTLPKSFLFSSDGSSGGGGVLQGTTCEAILCTLTAARDKMLNKIGRENINKLVVYASDQTHCAMQKAAQIAGINPKNFRAIATSKATNFGLSPSSLQSTILADIKSGLVPLFLCATVGTTSSTAVDPIGPLCEVAKMYGIWVHVDAAYAGSACICPEFRHFIDGVEDADSFSLNAHKWFFTTLDCCCLWVKDSSSLVKALSTNPEYLKNKATESKQVIDYKDWQVALSRRFRSMKLWLVLRSYGIANLRTFLRSH…
Papaver nudicaule	Tyrosine decarboxylase	TYDC	>MCL7039890.1	MGSLPTNSLESMSLFSQNPLDPDEFRRQGHMIIDFLADYYKNVEKYPVRSQVEPGYLKKRLPESAPYNSESIETILEDVTNDIIPGLTHWQSPNYFAYFPSSGSIAGFLGEMLSTGFNVVGFNWMSSPAATELESIVMNWLGQMLTLPKSFLFSSDGSSGGGGVLQGTTCEAILCTLTAARDKMLNKIGRENINKLVVYASDQTHCALQKAAQIAGINPKNFRAIATSKATNFRLSPNSLQSTILADIESGLVPLFLCATVGTTSSTAVDPIGPLCGVAKKYGIWVHIDAAYAGSACICPEFRHFIDGVEDADSFSLNAHKWFFTTLDCCCLWVKDSDSLVKALSTSPEYLKNKATDSKQVIDYKDWQIALSRRFRSMKLWLVLRSYGVANLRTFLRSH…
Papaver nudicaule	Tyrosine decarboxylase	TYDC	>MCL7043589.1	MGSLSTNNLESMSLCSQNPLDPDEFRRQGHMIIDFLADYYKNVETYPVRSQVEPGYLKKRLPESAPYNSESIETILEDVTTDIIPGLTHWQSPNYFAYFPSSGSIAGFLGEMLSTGFNVVGFNWMSSPAATELESIVMNWLGQMLTLPKSFLFSSDGSSGGGGVMQGTTCEAILCTLTAARDKMLNKIGRENINKLVVYASDQTHCALQKAAQIAGINPKNFRAIATSKATNFGLSPSSLQSTILADIESGLVPLFLCATVGTTSSTAVDPIGPLCGVAKKYGIWVHIDAAYAGSACICPEFRHFIDGVEDADSFSLNAHKWFFTTLDCCCLWVKDSDSLVKALSTSPEYLKNKATDSKQVIDYKDWQIALSRRFRSMKLWLVLRSYGVANLRTFLRSH…
Papaver nudicaule	Tyrosine decarboxylase	TYDC	>MCL7027053.1	MGSLPTDNLESLSMCSQNPLDPDEFRRQALRTFNIDFLADYYKNVESYPVRSQVEPGYLRKRLPETTPNNSESIETILQDVTNDIIPGLTHWQSPNYFAYFPSSGSIAGFLGEMLSTGFNVVGFNWMSSPAATELESIVMNWLGQMLTLPKSFLFSSDGSSGGGGVLQGTTCEAILCTLTAARDKMLNKIGRENINQLVVYASDQTHCAMQKAAQIAGINPKNFRAIATSKSTNFSLFPSSLQSTILADIESGLVPLFLCATVGTTSSTAVDPIGPLCEVAKMHGIWVHVDAAYAGCACICPEFRHFIDGVEEADSFSLNAHKWFFTTLDCCCLWVKDSSSLVKARSTNPEYLKNKASESKQVIDYKDWQVALSRRFRSMKLWLVLRSYGIANLRTFLR…
Papaver nudicaule	Tyrosine decarboxylase	TYDC	>MCL7035689.1	MGSLPSDNLENMSVCSQXXXXETAPNHSESIETILQDVQNDIIPGITHWQSPNYFAYFPSSGSVAGFLGEMLSTGFNVVGFNWMSSPAATELESIVMNWLGQMLNLPKSFLFSSDDNASSGGGVLQGTTCEAILCTLTASRDKMLNKIGRENINKLVVYASDQTHCALQKAAQIAGINPKNFRAIATSKATDFGLSPQSLLSTILADIESGLVPLFLCATVGTTSSTAVDPIGPLCEVAKQFGIWVHVDAAYAGSACICPEFRHFIDGVEEADSFSLNAHKWFFTTLDCCCLWVKDSNALVKALSTNPEYLKNKATDSKQVIDYKDWQIALSRRFRSMKLWLVLRSYGVANLRSFLRSHVKMAKHFDGLVAMDKRFEIVVPRTFAMVCFRLKPAAIFNG…
Papaver nudicaule	Tyrosine decarboxylase	TYDC	>MCL7035565.1	MVSLPTESHESMSISSQNPIAPDEFRRQGHMMIDFLADYYKNVGSYPVRIQVEPGYLRERLPETAPNNSESIETILQDVTNDIIPGLTQWQSPNNFADFPSSGSIAGFLGEMLSTGFNAVGFNSMSSPAATELESIVVNWLGQMLALPKSFLLSTDGSSGGGGGVLQGTTEAILCTLTAARDKMLNKIGRESIEKLVVYASDQAHCALEKAAQIAGINPKNFRAIATSKATNFGLSPGSLQSAILADIESGLVPLFLCATVGTTSSMAVDPIGPLCEVAKTYGIWVHVDAAYAGSACICPEFRHFIDGVEEADSFSLNAHKWFFTTLDCCCLWVKDSNSLVKALSTIPEYPKNKATESKQTTLSRRFQSMKLWLVLRSYGIANLRTFLRSHIKMARHFQ…
Papaver nudicaule	Tyrosine decarboxylase	TYDC	>MCL7026466.1	MVSLPTESHESMSISSQNPMEPDEFRRQGHMMIDFLADYYKNLGSYPVRRQVEPGYLRERLPETAPNNSESIETILQDVTNDIIPGLTQWQSPNNFADFPSSGSIAGFLGEMLSTGFNAVGFNSMSSPAATELESIVVNWLGQMLALPKSFLLSTDGSSGGGGGVLQGTTEAILCTLTAARDKMLNKIGRESIGKLVVYASDQAHCALEKAAQIAGINPKNIRAVATSKATNFGLSPGSLQSAILADIESGLVPLFLCATIGTTSSMAVDPIGPLCEVAKMYGIWVHVDAAYAGSACICPEFRHFIDGVEEADSFSVNAHKWFFTTLDCCCLWVKDSISLVKVLSTIPEYMKNKATESKQTTLSRRFQSMKLWLVLRSYGIANLRTFLRSHVKMARHFQ…
Papaver nudicaule	Tyrosine decarboxylase	TYDC	>MCL7043014.1	MQIMLRSKQIGPLTQCARSFLLGGTRNNGAEGSPCLYPEDETYAPRKQLRNNGVLLPHKGSTLGARDGAILSGDAVGATGFKIESGGKPAATHVVSVPGPSLKLDSGRSVGNDVCGIHNDHIPSTAHVSDQFVKAGIAAVGLLSDLVNYKLPVADGKEVLHKSTNCMLDPSRPISSLRPSNIKQVKRESFVTVGRKATDVEIGHGKTSNVRCDAQAEKFAPVKTTCTNHRSRNGVQDNSVNNHNVPSGTRYRQRQPVQQKSKLTSYRVVSNSKSGQASEIKAAGSTSERIRSDTDYVQNPSTYARTPTGFIPLARHNMNTGHAVERVFNILQQRKWGPSAEEALEKLNCSLDPYQANQVLKQLQDHSIALGFFNWLRRRPGFKHDGHTYTTMVGILGRA…
Papaver nudicaule	Tyrosine aminotransferase	TyrAT	>MCL7040791.1	MEKNCNGNGVHKKWGFSANNEIDSASGITIRGVLNNLMNSRNPEDERPTIPLGHGDPSAFPCFRTTQIAEDAIVDSVRSAKFNGYSPTVGILPARRSIADYLSRDLPYKLSPDDVFLTIGCTQAIEIAMMVFARPGANILLPRPGFPYYEACAGFRNLEYRHFDLLPEKGWEVDLEAVEALADENTVGMVIINPGNPCGSVYTYEHLKKIAETAKKLGILVIADEVYGHLTFASNPFVPMGVFGSIVPVLTLGSISKRWIVPGWRLGWLATSDPNGILKETKVVESIISCLNISGDPATFIQAAIPQIIEKTTDDFFNKVITILRKSAEIIYDQLKDIHCITCPHKPEGSMFVMVKFNSALMEDIKDDMEFCFKLAKEESLIILPGTAVGMKNWLRITF…
Papaver nudicaule	Tyrosine aminotransferase	TyrAT	>MCL7022954.1	MEKNCNGNGVHKKWGFSANNEIDSASGITIRGVLNNLMNSRNPEDERPTIPLGHGDPSAFPCFRTTQIAEDAIVDSVRSAKFNGYSPTVGILPARRSIADYLSRDLPYKLSPDDVFLTIGCTQAIEIAMMVFARPGANILLPRPGFPYYEACAGFRNLEYRHFDLLPEKGWEVDLEAVEALADENTVGMVIINPGNPCGSVYTYEHLKKIAETAKKLGILVIADEVYGHLTFASNPFVPMGVFGSIVPVLTLGSISKRWIVPGWRLGWLATSDPNGILKETKVVESIISCLNISGDPATFIQAAIPQIIEKTTDDFFNKVITILRKSAEIIYDQLKDIHCITCPHKPEGSMFVMVKFNSALMEDIKDDMEFCFKLAKEESLIILPGTAVGMKNWLRITF…
Papaver nudicaule	Tyrosine aminotransferase	TyrAT	>MCL7035945.1	MENGNGKKWGFRADNDIDSAGITIRGILNDLMNSRNQEDERPTIPLGHGDPSAFPCFRTSQIAEDAIVDSLRSAKFNGYSPTVGMLPARRSIADYLSRGLPYKLSPDDVFLTVGCTQAIEIAMMVFARSGANILLPRPGFPYYEACAGFRNLEYRHFDLLPDKGWEVDLEAVEALADENTVGMVIINPGNPCGSVYTYEHLKKIAGTAKKLGILVIADEVYGHLTFASKPFVPMGVFGSIVPVLTLGSMSKRWIVPGWRLGWLATSDPNGILKETKVVESIISCINISGDPVTFIQAAIPQIIEKTADDFFNKVISILRESAEIMYDQLKDIDCVTCPHKPEGSMFVMVKLNSTLMEDINDDMEFCFKLATEESLIILPGTVLGMKNWLRITFAIDPTS…
Papaver nudicaule	Tyrosine hydroxylase	3OHase	>MCL7032882.1	MGSLDDAKFTETSIVNNFNPLDPEEFRKQAYQTIDFIVDYYKNIETYPVLSQVEPGYLRNSLPTTPPFKPEPFEKILKDVRTQIIPGMTNWLSPNFFAYFPATVSTAGFIGEMLSTCFNSVGFNWLASPAATELEMVVMDWFADMLKLPRTFKFSGSGGGVIQGTTSEAILCTLVAARDRALDRIGGNNIGKLIVYGSDQTHSTFVKACKIAGILPGNVRSLPTTIDMDFSLSPYVVRAAVETDVANGFVPIYLCLTVGTTSSNAVDPIDQFSELASDYGTIWLHVDAAYAGSACICPEFRHYLNGIERVDSLSLSPHKWFLTYLDCCCLWVKNPSLLIRALSTNPEYLKNKPSELNLVVDYKDWQVGTGRKFRSLKLWLVLRSYGVENLQSHIRSDVR…
Papaver nudicaule	Tyrosine hydroxylase	3OHase	>MCL7042105.1	MESLGDAKFTETSILNEFKPLDPEEFRKQAYQTIDFIVDYYKNIETHPVLSQVKPGYFQSTLPSTPPYKPEPFEKILKDVQTQIIPGMTNWLSPNFFAYFPATVSTAAFMGEMLSTCFNSVGFNWLASPAATELEMVVMDWFADMLKLPSTFKFSGSGGGVIQGTTSEAILCTLVAARDRALDRIGSNNIGKLIVYGSDQTHSTFVKACKIAGILACNIRSLPTTIDLDFSLCPSLVCAAVEADVANGFVPIYLCLTVGTTSSNAVDPIDQFSDVATDYGIWLHVDAAYAGSACICPEFRHYLNGIERVDSLSLSPHKWFLTYLDCCCLWVKNPSLLIRALSTNPEYLKNKPSESNLVVDYKDWQVGTGRKFRSLKLWLVLRSYGVENLQSHIRSDVRM…
Papaver nudicaule	Tyrosine hydroxylase	3OHase	>MCL7052011.1	MLSTCFNSVGFNWLASPAATELEMVVMDWFAEMLKLPSSFKFSGSGGGVIQGTTSEAILCTLIAARDRALDRIGGNNIGKLIVYGSDQTHSTFVKACKIAGVLPCNIRSLPTTTDMDFSLSPSLVRAAVEADVANGFVPIYLCLTVGTTSSNAVDTIDQFSDVASDYGIWVHVDAAYAGSACICPEFRHYLNGIERVDSLSLSPHKWFLTYLDCCCLWVKNPSLLIRALSTNPEYLKNKPSESNLVIDYKDWQVGTGRKFRSLKLWLVLRSYGVENLQSHIRSDVRMAEMFEGFVRNDSQFEIVVPRRFALVCFRWNPDSSLVPAGHNVELMNRKLLDWINASGQVYMTHTIVGGVYMLRFAVGATLTEEPHVIAAWKLIKEGAQTLLVNRSFISC
Papaver nudicaule	Tyrosine hydroxylase	3OHase	>MCL7035819.1	MLSTCFNSVGFNWLASPAATELEMVVMDWFAEMLKLPSSFKFSGSGGGVIQGTTSEAILCTLIAARDRALDRIGGNNIGKLIVYGSDQTHSTFVKACKIAGVLPCNIRSLPTTTDMDFSLSPSLVRAAVEADVANGFVPIYLCLTVGTTSSNAVDTIDQFSDVASDYGIWVHVDAAYAGSACICPEFRHYLNGIERVDSLSLSPHKWFLTYLDCCCLWVKNPSLLIRALSTNPEYLKNKPSESNLVIDYKDWQVGTGRKFRSLKLWLVLRSYGVENLQSHIRSDVRMAEMFEGFVRNDSQFEIVVPRRFALVCFRWNPDSSLVPAGHNVELMNRKLLDWINASGQVYMTHTIVGGVYMLRFAVGATLTEEPHVIAAWKLIKEGAQTLLVNRSFISC
Papaver nudicaule	Tyrosine hydroxylase	3OHase	>MCL7035819.1	MLSTCFNSVGFNCLASPAATELEMVVMDWFADMLKLPSVFKFSGSGGGVIQRTTSEAILCTLVAARDRALDRIGGDNIGKLIVYGSDQTHSTFVKACKIAGVLPCNIRSLPTTIDMDFSLSPAIVSAAVEADVANGFVPIYLCLTVGTTSSNAVDPIDQLSDVASDYGIWVHVDAAYAGSACICPEFRHYLNGIERVDSLSLSPHKWFLTYLDCCCLWVKNPSLLIRALSTNPEYLKNKPSESNLVVDYKDWQVGTGRKFRSLKLWLVLRSYGVENLQSHIRSDVRMAEMFERFVRNDSQFEIVVPRRFALVCFRWNPDSCMVPAGHNVELMNRKLLDWINSTGQVYMTHTIVGGVYMLRFAVGATLTEEPHVIAGS  tryptophan decarbox…
Papaver nudicaule	Hydroxyphenylpyruvate decarboxylase	HPPDC	>MCL7041797.1	MGSLNTENVLENSSAFGVTNPLDPEEFRRQGHMIIDFLADYYRDVEKYPVRSQVEPGYLSKRLPETAPYNPESLETILQDVTTEIIPGLTHWQSPNYYAYFPSSGSVAGFLGEMLSTGFNVVGFNWMSSPAATELESIVMDWFGKMLNLPKSFLFSGTGGGVLQGTTCEAILCTLTAARDRKLNKIGREHIGRLVVYGSDQTHCALQKAAQIAGINPKNFRAVKTFKANSFGLAAATLREVILEDIEAGLIPLFVCPTVGTTSSTAVDPIGPICEVAKEFGMWVHVDAAYAGSACICPEFRHFIDGVEEADSFSLNAHKWFFTTLDCCCLWVRDPSALVTALSTNPEYLRNKATESRQVVDYKDWQIALSRRFRSMKLWMVLRSYGVTNLRNFLRSHVK…
Papaver nudicaule	Hydroxyphenylpyruvate decarboxylase	HPPDC	>MCL7036626.1	MGSLNTENVLENSSAFGGVTNPLDPEEFRRQGHMIIDFLADYYRDVEKYPVRSQVEPGYLRKRLPETAPYNPESIETILQDVTTEIIPGLTHWQSPNYYAYFPSSGSVAGFLGEMLSTGFNVVGFNWMSSPAATELESIVMDWFGKMLNLPKSFLFSGSGGGVLQGTTCEAILCTLTAARDRKLNKIGREHIGRLVVYGSDQTHCALQKAAQIAGINPKNFRAVKTFKANSFGLAASTLREVILEDIEAGLIPLFVCPTVGTTSSTAVDPIGPICEVAKEFEMWVHVDAAYAGSACICPEFRHFIDGVEEADSFSLNAHKWFFTTLDCCCLWVKDPSALVTALSTNPEYLRNKATESRQVVDYKDWQIALSRRFRSMKLWMVLRSYGVTNLRNFLRSHV…
Papaver nudicaule	Hydroxyphenylpyruvate decarboxylase	HPPDC	>MCL7043590.1	MGSLPTNNLESMSLCSQNPLDPDEFRRQGHMIIDFLADYYKNVEKYPVRSQVEPGYLKKRLPESAPYNPESIETILEDVTNDIIPGLTHWQSPNYFAYFPSSGSIAGFLGEMLSTGFNVVGFNWMSSPAATELESIVMNWLGQMLTLPKSFLFSSDGSSGGGGVLQGTTCEAILCTLTAARDKMLNKIGRENINKLVVYASDQTHCALQKAAQIAGINPKNFRAIATSKATNFGLSPNSLQSTILADIESGLVPLFLCATVGTTSSTAVDPIGLLCGVAKKYGIWVHIDAAYAGSACICPEFRHFIDGVEDADSFSLNAHKWFFTTLDCCCLWVKDSDSLVKALSTSPEYLKNKATDSKQVIDYKDWQIALSRRFRSMKLWLVLRSYGVANLRTFLRSH…
Papaver nudicaule	Hydroxyphenylpyruvate decarboxylase	HPPDC	>MCL7024230.1	MGSLPTGNLESMPMCSQNPLDPDEFRRQGHMIIDFLADYYKNVESYPVRSQVEPGYLRKRLPETAPNNSESIETILQDVTNDIIPGLTHWQSPNYFAYFPSSGSIAGFLGEMLSTGFNVVGFNWMSSPAATELESIVMNWLGQMLTLPKSFLFSSDGSSGGGGVLQGTTCEAILCTLTAARDKMLNKIGRENINKLVVYASDQTHCAMQKAAQIAGINPKNFRAIATSKATNFGLSPSSLQSTILADIKSGLVPLFLCATVGTTSSTAVDPIGPLCEVAKMYGIWVHVDAAYAGSACICPEFRHFIDGVEDADSFSLNAHKWFFTTLDCCCLWVKDSSSLVKALSTNPEYLKNKATESKQVIDYKDWQVALSRRFRSMKLWLVLRSYGIANLRTFLRSH…
Papaver nudicaule	Hydroxyphenylpyruvate decarboxylase	HPPDC	>MCL7039890.1	MGSLPTNSLESMSLFSQNPLDPDEFRRQGHMIIDFLADYYKNVEKYPVRSQVEPGYLKKRLPESAPYNSESIETILEDVTNDIIPGLTHWQSPNYFAYFPSSGSIAGFLGEMLSTGFNVVGFNWMSSPAATELESIVMNWLGQMLTLPKSFLFSSDGSSGGGGVLQGTTCEAILCTLTAARDKMLNKIGRENINKLVVYASDQTHCALQKAAQIAGINPKNFRAIATSKATNFRLSPNSLQSTILADIESGLVPLFLCATVGTTSSTAVDPIGPLCGVAKKYGIWVHIDAAYAGSACICPEFRHFIDGVEDADSFSLNAHKWFFTTLDCCCLWVKDSDSLVKALSTSPEYLKNKATDSKQVIDYKDWQIALSRRFRSMKLWLVLRSYGVANLRTFLRSH…
Papaver nudicaule	Hydroxyphenylpyruvate decarboxylase	HPPDC	>MCL7043589.1	MGSLSTNNLESMSLCSQNPLDPDEFRRQGHMIIDFLADYYKNVETYPVRSQVEPGYLKKRLPESAPYNSESIETILEDVTTDIIPGLTHWQSPNYFAYFPSSGSIAGFLGEMLSTGFNVVGFNWMSSPAATELESIVMNWLGQMLTLPKSFLFSSDGSSGGGGVMQGTTCEAILCTLTAARDKMLNKIGRENINKLVVYASDQTHCALQKAAQIAGINPKNFRAIATSKATNFGLSPSSLQSTILADIESGLVPLFLCATVGTTSSTAVDPIGPLCGVAKKYGIWVHIDAAYAGSACICPEFRHFIDGVEDADSFSLNAHKWFFTTLDCCCLWVKDSDSLVKALSTSPEYLKNKATDSKQVIDYKDWQIALSRRFRSMKLWLVLRSYGVANLRTFLRSH…
Papaver nudicaule	Hydroxyphenylpyruvate decarboxylase	HPPDC	>MCL7027053.1	MGSLPTDNLESLSMCSQNPLDPDEFRRQALRTFNIDFLADYYKNVESYPVRSQVEPGYLRKRLPETTPNNSESIETILQDVTNDIIPGLTHWQSPNYFAYFPSSGSIAGFLGEMLSTGFNVVGFNWMSSPAATELESIVMNWLGQMLTLPKSFLFSSDGSSGGGGVLQGTTCEAILCTLTAARDKMLNKIGRENINQLVVYASDQTHCAMQKAAQIAGINPKNFRAIATSKSTNFSLFPSSLQSTILADIESGLVPLFLCATVGTTSSTAVDPIGPLCEVAKMHGIWVHVDAAYAGCACICPEFRHFIDGVEEADSFSLNAHKWFFTTLDCCCLWVKDSSSLVKARSTNPEYLKNKASESKQVIDYKDWQVALSRRFRSMKLWLVLRSYGIANLRTFLR…
Papaver nudicaule	Hydroxyphenylpyruvate decarboxylase	HPPDC	>MCL7035689.1	MGSLPSDNLENMSVCSQXXXXETAPNHSESIETILQDVQNDIIPGITHWQSPNYFAYFPSSGSVAGFLGEMLSTGFNVVGFNWMSSPAATELESIVMNWLGQMLNLPKSFLFSSDDNASSGGGVLQGTTCEAILCTLTASRDKMLNKIGRENINKLVVYASDQTHCALQKAAQIAGINPKNFRAIATSKATDFGLSPQSLLSTILADIESGLVPLFLCATVGTTSSTAVDPIGPLCEVAKQFGIWVHVDAAYAGSACICPEFRHFIDGVEEADSFSLNAHKWFFTTLDCCCLWVKDSNALVKALSTNPEYLKNKATDSKQVIDYKDWQIALSRRFRSMKLWLVLRSYGVANLRSFLRSHVKMAKHFDGLVAMDKRFEIVVPRTFAMVCFRLKPAAIFNG…
Papaver nudicaule	Hydroxyphenylpyruvate decarboxylase	HPPDC	>MCL7035565.1	MVSLPTESHESMSISSQNPIAPDEFRRQGHMMIDFLADYYKNVGSYPVRIQVEPGYLRERLPETAPNNSESIETILQDVTNDIIPGLTQWQSPNNFADFPSSGSIAGFLGEMLSTGFNAVGFNSMSSPAATELESIVVNWLGQMLALPKSFLLSTDGSSGGGGGVLQGTTEAILCTLTAARDKMLNKIGRESIEKLVVYASDQAHCALEKAAQIAGINPKNFRAIATSKATNFGLSPGSLQSAILADIESGLVPLFLCATVGTTSSMAVDPIGPLCEVAKTYGIWVHVDAAYAGSACICPEFRHFIDGVEEADSFSLNAHKWFFTTLDCCCLWVKDSNSLVKALSTIPEYPKNKATESKQTTLSRRFQSMKLWLVLRSYGIANLRTFLRSHIKMARHFQ…
Papaver nudicaule	Hydroxyphenylpyruvate decarboxylase	HPPDC	>MCL7026466.1	MVSLPTESHESMSISSQNPMEPDEFRRQGHMMIDFLADYYKNLGSYPVRRQVEPGYLRERLPETAPNNSESIETILQDVTNDIIPGLTQWQSPNNFADFPSSGSIAGFLGEMLSTGFNAVGFNSMSSPAATELESIVVNWLGQMLALPKSFLLSTDGSSGGGGGVLQGTTEAILCTLTAARDKMLNKIGRESIGKLVVYASDQAHCALEKAAQIAGINPKNIRAVATSKATNFGLSPGSLQSAILADIESGLVPLFLCATIGTTSSMAVDPIGPLCEVAKMYGIWVHVDAAYAGSACICPEFRHFIDGVEEADSFSVNAHKWFFTTLDCCCLWVKDSISLVKVLSTIPEYMKNKATESKQTTLSRRFQSMKLWLVLRSYGIANLRTFLRSHVKMARHFQ…
Papaver nudicaule	Norcoclaurine synthase	NCS	>MCL7032741.1	MILLGKIARALKMDSDEMEELFSDCSQIMKMNYYPPCPKSKQVLGISPHSDAAALTILLQVNETDGLQIRKDGKWVPVKPIPGALIVNIGDMLEILSNGAYSSIEHRVIVNPTIERLSIATFHSINPDAEFGPAHSLIDPPHKPALFRRETAEKYYQNFFAHKLNGKTTNLDFMRIQNGLRGNHSS
Papaver nudicaule	Norcoclaurine synthase	NCS	>MCL7031135.1	MRMNYYPPCPRPELVIGITSHSDFSGLTILLQLNEVEGLQIKKEERWISIKPLPDAFIVNVGDVLEIMTNGIYRSVDHRAAVNSTKERLSLATFHDPKPESEIGPISSLITPQTPALFKRGGFENLAKEYLSKKLDGKSFLDRMRM
Papaver nudicaule	Norcoclaurine synthase	NCS	>MCL7050506.1	MRVNYYPPCPQPEHVIGLTPHSDGGGLTILLQLNEVDGLQIRKENVWVPTKPLPNAFVVNIGNILEILSNGIYRSVEHRATVNLTKERLSLATFHNPKIGTKVGPIPSMITPETPALFKTIGYEDYKKKFFSRKLDGKSFLNSMRIGESDEDNIPL
Papaver nudicaule	Norcoclaurine synthase	NCS	>MCL7028397.1	MRINYYPPCPQPEHVLGATPHSDITGLTILLQLNEVDGLQISKENMWVPIKPLPNAFVVNIGDLLEIMSNGIYRSVEHRVTVNSTKERLSVATFINPKMKSEIGPIPCMITPETPALFRTVGYEDYLRKYYTRTVLGGKSYLDYMKIGGDKDMQ
Papaver nudicaule	Norcoclaurine synthase	NCS	>MCL7021741.1	MSSFGSSLIVPSVQELVKKEITEIPDRYIRTSCSSIGLDHETTHSDSAAHSIPVVNIERLLSRESILADEELEKLHSACKDWGFFQVVDHGVSFSTIEKIKLEIHNFFELPLEEKKKLWQKPGDHEGFGQLFVVSDEQKLDWSDMFYITMLPTIMRKPHLFAGMSLPL
Papaver nudicaule	Norcoclaurine 6O methyltransferase	6OMT	>MCL7046839.1	MEVVNKIDQENQAKIWKQIYGFAESLVLKCAVQLEIAETLHNNVKPMSLSELASKLPVQPVNEDRLYRIMRYLVHMGLFNKDASTQKYSMAPPSKYLLRGWEKSMVASILCINDKDFLAPWHHLSDGLTGNCDAFEKALGKSIWDYMSENPEKNQLFNSAMACDTRLVTSALLSEGKSIFSHGISTLVDVGGGTGTAVKAISKAFPDIKCTVYDLPHVIADSPDIPNITKISGDMFKSIPSADAIFMKCILHDWNDEECVQILKRCKEALPKEGKVIIVDIILDMDSTHPYAKIRLTLDLDMMLNTGGKERTEEEWKKLIDAAGFASYKITQLSAVQSVIEAYPY
Papaver nudicaule	Norcoclaurine 6O methyltransferase	6OMT	>MCL7038333.1	MEVVNKIDQENQAKIWKQIYGFAEPLVLKCAVQLEIAETLHSNVKPMSLSELASKLPVQPVNEDRLHRIMRYLVHMKLFNKDESTHKYSMAPPSKYLLRGWEKSMVDTILCITDKVFLAPLNHLSDGLAGNCDAFEKAWGKSIWDYMSENPEKNQLFNASMACDTRLVTSALVTEGKSIFNDGVNTLVDVGGGTGTAVKAISKAFPDIKCTIYDLPHVIADSPEIPNITKISGDMFKSVPNADAIFMKCILHDWNDEECIQILKRCKEALPKEGKVIIVDIVLDRDSTHPYAKIRLTYDLEMMLTTGGKERTEEEWKKLIDAAGFASYKITQLSAVQSVIEAYPY
Papaver nudicaule	Norcoclaurine 6O methyltransferase	6OMT	>MCL7035136.1	MEVVNKIDQENQAKIWKQIYGFAEPLVLKCAVQLEIAETLHSNVKPMSLSELASKLPVQPVNEDRLHRIMRYLVHMKLFNKDESTHKYSMAPPSKYLLRGWEKSMVDTILCITDKVFLAPLNHLSDGLAGNCDAFEKAWGKTIWDYMSENPEKNQLFNASMACDTRLVTSALVTEGKSIFSDGINTLVDVGGGTGTAVKAISNAFPDIKCTIYDLPHVIADSPEIPNVTKISGDMFKSVPNADAIFMKCILHDWNDEECIQILKRCKEALPKEGRVIIVDIVLDRDSTHPYAKIRLTYDLEMMLTTGGKERTEEEWKKLIDAAGFASYKITQLSAVQSVIEAYPY
Papaver nudicaule	Coclaurine N methyltransferase	CNMT	>MCL7036210.1	METLIQVPYNATVRVMLSSLERNLLPDVVIRKLTKLLLASRLRLGYKPSSEIQLSDLIQFAHSLEEMPIAIKTDSAKEQHYELPTSFFKLVLGKYMKYSCCYFAGKTTTLEDAEQAMLELYCERAQIKDGQTVLDVGCGWGSFSLYIAQKYKNCNITGICNSKTQKEHIEEQCRELQLQNVEIIVADISTFDMEGSYDRIVSIEMFEHMKNYKELLKKISKWMKEDSLLFVHYFCHKAFAYHFEDTSEDDWITRYFFTGGTMPSANLLLYFQDDVSIVNHWLVNGKHYAQTSEEWLKRMDKNISSIKPIMESTYGKDAAVKWTVYWRTFFISVAELFGYNNGEEWMVAHFLFKKK
Papaver nudicaule	N methylcoclaurine 3 hydroxylase, CYP82B	NMCH/CYP80B3	>MCL7051959.1	MEIVTVALIAIVITTLLYLIFRDSSAKGLPPGPKPWPIVGNLLQLGEKPHSQFAQLAETYGDLFTLRLGTQTVVVANTPLAASEVLKTHDRVLSGRYVFQSFRVKEHVKNSVVWSDCNETWKKLRKVCRTELFTQKMIESQAEVRERTVMEMVEYLKENEGKEVKIVQVVFGTLVNIFGNLIFSQNIFKLGDESSGSVEMKERLWRMLELGNSTNLADYFPFLGNLDLLGQRKDVADCLQGVYDIWGAILKERKIAKQRSSDTKNDFVDVLLDAGLDDQQINSLLM
Papaver nudicaule	N methylcoclaurine 3 hydroxylase, CYP82B	NMCH/CYP80B3	>MCL7041124.1	MEIVTVALIAIVITTLLYLIFRDSSAKGLPPGPKPWPIVGNLLQLGEKPHSQFAQLAETYGDLFTLRLGTQTVVVANTPLAASEVLKTHDRVLSGRYVFQSFRVKEHVKNSVVWSDCNETWKKLRKVCRTELFTQKMIESQAEVRERTVMEMVEYLKENEGKEVKIVQVVFGTLVNIFGNLIFSQNIFKLGDESSGSVEMKERLWRMLELGNSTNLADYFPFLGNLDLLGQRKDVADCLQGVYDIWGAILKERKIAKQRSSDTKNDFVDVLLDAGLDDQQINSLLM
Papaver nudicaule	N methylcoclaurine 3 hydroxylase, CYP82B	NMCH/CYP80B3	>MCL7033810.1	MEIVTVALIAIVITTFLYFIFRDSTPKGLPPGPKPWPIVGNLLQLGEKPHSQFAQLAETYGDLFTLKLGTETVVVASTPLAASEILKAHDRVLSGRYVFQSFRVKNHVENSIVWSECNETWKKLRKVCRTELFTQKMIESQAGVRETKAMEMVEYLKLNEGKEVKIAEVVFGTLVNIFGNLIFSQNIFKLGDESSGSVEMKEHLWRMLELGNSTNPADYFPFLGSWDLFGQRKDVADCLQGIYNVWGAMLKERKIAKQHKKGTKDDFVDILLDSGLDDQQINALLM
Papaver nudicaule	3’‐hydroxy‐N‐methyl‐(S)‐coclaurine-4’-O-methyltransferase	4OMT	>MCL7044450.1	MGSLDMKPAEAQEVGIKDQAQLWNIIYGFADSLVLRCTVEIGIADIIKNNNGSITLAQLASKLPIANVNSDYLYRILRYLVHLNILTCNGGGVDKYSLKPAGTLLLKDAERSMVPMILGMTQKDFMVPWHFMKDGLAAGNTTAFEEGMGMNIWTYLEGNPDQSQLFNEGMAGETRLLTKTLIEDCRDTFEGLDSLVDIGGGNGTTIKAIYEAFPHIKCTLYDLPHVIANSHDHPNIKKVPGDMFKSVPSAQAILLKLILHDWTDEECVSILKKCKEAIPKETGKLIIVDVALEEKSQHELTKTRLILDIDMLVNTGGRERTADDWESLLKRAGFRSHKIRPIRAIQSVIEAFP
Papaver nudicaule	3’‐hydroxy‐N‐methyl‐(S)‐coclaurine-4’-O-methyltransferase	4OMT	>MCL7027687.1	MGSLDAKPAETQELGIKDQAQLWNIIYGFGDSLVLRCAVEIGIADIIKNNNGSITLAQLASQLPIPIVNSDYLYRILRYLVHMNILEQETCNGGVDKVYSLKPVGTLLLRDAERSMVPIILGLTQKDFMVPWQFMKEGLESESTTAFEIGMGMTVWKFLEGHPDQSQLFNEEMAGETRLLTKTLFEDCGDAFQGLDSLVDVGGGNGTLIMAIYEAFPHIKCTLYDLPHVIANSHEYPNIEKVSGDMFKSVPSAQAVLLKMILHDWTDEECVNILKKCKEAIPKETGKVIIVDVALEEDSTHELTKTRLLLDIDMLVTTGGRERTVDDWENLLKRAGFRSHKIRPIRSIQSVIEAFP
Papaver nudicaule	3’‐hydroxy‐N‐methyl‐(S)‐coclaurine-4’-O-methyltransferase	4OMT	>MCL7035707.1	MGSSPAAETQEVGIKDQAHLWNIIYGFADSLVLRCAVEIGIADIIKNNNGSITLAQLSSKLPIPNVNSEHLHRILRYLVHLNILHQETCNGGVDKVYSLKPAGTLLSRDAERSMVPMILGMTQKDFMVPWHFIKEGLENSGKTTAFEIAMGIDIWKYLEDKPDQSQLFNEGMAGETRLLTKTLIEDCRDMFQGLDSLVDIGGGNGTTIMAIYKAFPGIKCTLYDLPHVVANSHEHPNIEKMSGDMFEFVPSAQAILLKMILHDWTDEKCVNILEKCRVAIPKETGKVIIVDVALEERSEHELTKTRLILDIDMLVNTGGRERTADDWGNLLKRAGFRSHKIRPIRAIQSVIEAFP
Papaver nudicaule	3’‐hydroxy‐N‐methyl‐(S)‐coclaurine-4’-O-methyltransferase	4OMT	>MCL7045117.1	MGMNIWTYLEGNPDQSQLFNEGMAGETRLLTKTLIEDCRDTFEGLDSLVDIGGGNGTTIKAIYEALPHIKCTLYDLPHVIANSHDHPNIEKVPGDMFKSVPSAQAILLKLILHDWTDEECVSILKKCKEAIPEETGKVIIVDVALEEKSQHELTKTRLILDIDMLVNTGGRERTADDWENLLKRAGFRSHKIRPIRAIQSVIEAFP
Papaver nudicaule	3’‐hydroxy‐N‐methyl‐(S)‐coclaurine-4’-O-methyltransferase	4OMT	>MCL7044764.1	MGMNIWTYLEGNPDQSQLFNEGMAGETRLLTKTLIEDCRDTFEGLDSLVDIGGGNGTTIKAIYEAFPHIKCTLYDLPHVIASSHDHPNVKKVPGDMFKSVPSAQAMLLKLILHDWTDEECVNILKKCREAIPKETGKLIIVDVALEEKSQHELTKTRLILDIDMLVNTGGRERTADDWETLLKRAGFRSHKIRPIRAIQSVIEAFP
Papaver nudicaule	Berberine bridge enzyme	BBE	>MCL7045933.1	MICRSLISCLFLLFLVQTCILDDDGLLLSCLNSHGVHNFTSRSTGTNSVYFKLLHVSIQNPLFAKSTVPKPSLIVMPGSKEELSSTIHCCTRESWTIRLRSGGHSYEGLSYTADTPFVIVDMMNLNRVSIDVESETAWVESGATLGELYHSIAQLTDTLGFTAGWCPTVGSGGHISGGGFGMMSRKYGLAADNVVDAILVDSSGAILNRETMGEDVFWAIRGGGGGVWGAIYAWKIKLLPVPEKLTVFRVTKNVGIDDASSLLHKWQYVADELDEDFTVSVLGGANENEAWLMFLGLNLGPKDAAKTIIDQKFPELGLTAEELQEMSWGESMGFLAGLETVSALNNRFLKFDDRAFKTKVDFTREAIPLDVFRGALERLSKQPGGFIALNGLGGKMSRI…
Papaver nudicaule	Berberine bridge enzyme	BBE	>MCL7034134.1	MPGSKKELSSTIHCCTRESWTIRLRSGGHSYEGLSYTADTPFVIVDMMNLNRVSVDVESETAWVESGATLGELYHSIAQSTDTLGFTAGWCPTVGSGGHISGGGFGMMSRKYGLAADNVVDAILIDSNGAILDREKMGEDVFWAIRGGGGGVWGAIYAWKIKLLPVPEKLTVFRVTKNVGIEDASSLLHKWQYVADELDEDFTVSVLGGANVNEAWLMFLGLHLGPKGAAKTIIDEKFPELGLTAEEFQEMSWGESMGFLAGLETVSDLNNRFLKFDDRAFKTKVDFTREPIPLDVFRRALEMLSTQPGGFIALNGLGGKMSTISTDFTPFPHRKGTRLMFEYIIAWNKDEETRIGEFSGWLAKFYDYMEPFVSKEPRVGYVNHIDLDLGGIDWRNRSS…
Papaver nudicaule	Berberine bridge enzyme	BBE	>MCL7040729.1	MPGSKEELSSTINCCTKESWTIRLRSGGHSYEGLSYTADTPFVIVDMMNLNRVSIDVESESAWVESGATLGELYYSIAQSTDTLGFTAGWCPTVGSGGHISGGGFGMMSRKYGLAADNVVDAILIDSNGAILDREKMGEDVFWAIRGGGGGVWGAIYAWKIKLLPVPEKLTVFRVTKNVGIEDASSLLHKWQYVADELDEDFTVSVLGGAQENEAWLMFLGLHLGPKGAAKAIIDEKFPELGLTAEEFQEMSWGESMGFLAGLETVSDLNNRFLKFDDRAFKTKVDFTREPIPLGVFRRSLEMLSTQPGGFIALNGLGGKMSTISTDYTPFPHRNGTRLMFEYIIAWNKDEETRIGEFSEWLAEFYDYMEPFVSKEPRVGYVNHIDLDLGGIDWRNRSS…
Papaver nudicaule	Canadine synthase	CAS/CYP719A2	>MCL7037398.1	MEETIFSNSWILTTSSLVVVTIITMLMVFKRKKSSTMVWPKGPKTLPIIGNMHILGGTALQVVLHNLAKIHGNVMTIWIGSWRPVIVVSDIDRAWEVLVNKSSDYSARDMPEITKIISADWKTISTSDSGPAWSTLRKGLQNVALSPHNLAAQSQFQEKDIAKMIQSLKKEAASNNGIVKPIDHLKKATLRLISRLIFGQDFDNDKYVDDMHHAIEELIRVSGYAQLAEAFYYAKYLPSHKKAVRDVEEANQRVKKLVRPFLSLNPPTNTYLHFLNSQNYDEEVIIFAIFEAYLLGVDSTSLTTAWALAFLIREPVVQDKLYQELKSFAVKNDREIVKVEDLNKLGYLQAVLKETMRMKPIAPLAIPHKACRDTSLKGNKIDKGTRVMVNIYALHHNEK…
Papaver nudicaule	Canadine synthase	CAS/CYP719A2	>MCL7025340.1	MTIWIGSWRPVIVVSDIDRAWEVLVNKSSDYSARDMPEITKIISADWKTISTSDSGPAWSNLRKGLQNVALSPHNLAAQSQFQEKDITKMIQSLKEEAASNNGIVKPIDHLKKATLRLISQLIFGQDFDNDKYVDDMHHAIEELIRVSGYAQLAEAFYYAKYLPSHKKAVRDVEEANQRVKKLVRPFLSLNPPPNTYLHFLNSQNYDEEVIIFAIFEAYLLGVDSTSLTTAWALAFLIREPVVQDKLYQELKNFAVKNDREIVKVEDLNKLKYLQAVLKETMRMKPIAPLAIPHKACRDTSLKGNKIDKGTKVMVNIYALHHNEKVWKEPYKFMPERFLQAQDVVNGKAMEQSLLPFSAGMRICAGMELGKLQFSFSLANLVNAFEWSCVSDGVLPDMS…
